# Supplementary material for: Direct oxidative amidation of aldehydes with amines catalyzed by heteropolyanion-based ionic liquids under solvent-free conditions via a dual-catalysis process
Source: Royal Society of Chemistry journal article supplement (doi:10.1039/c5ob02376a), 2016-01-01

**Electronic Supplementary Information (ESI)**

**Direct oxidative amidation of aldehydes with amines catalyzed by  
heteropolyanion-based ionic liquids under solvent-free conditions via  
a dual-catalysis process**

Renzhong Fu, Yang Yang,\* Jin Zhang, Jintao Shao, Xuming Xia, Yunsheng Ma, and  
Rongxin Yuan\*

*Jiangsu Laboratory of Advanced Functional Material, School of Chemistry and Materials Engineering,  
Changshu Institute of Technology, Changshu 215500, PR China*

# NMR spectra of ILs and amides

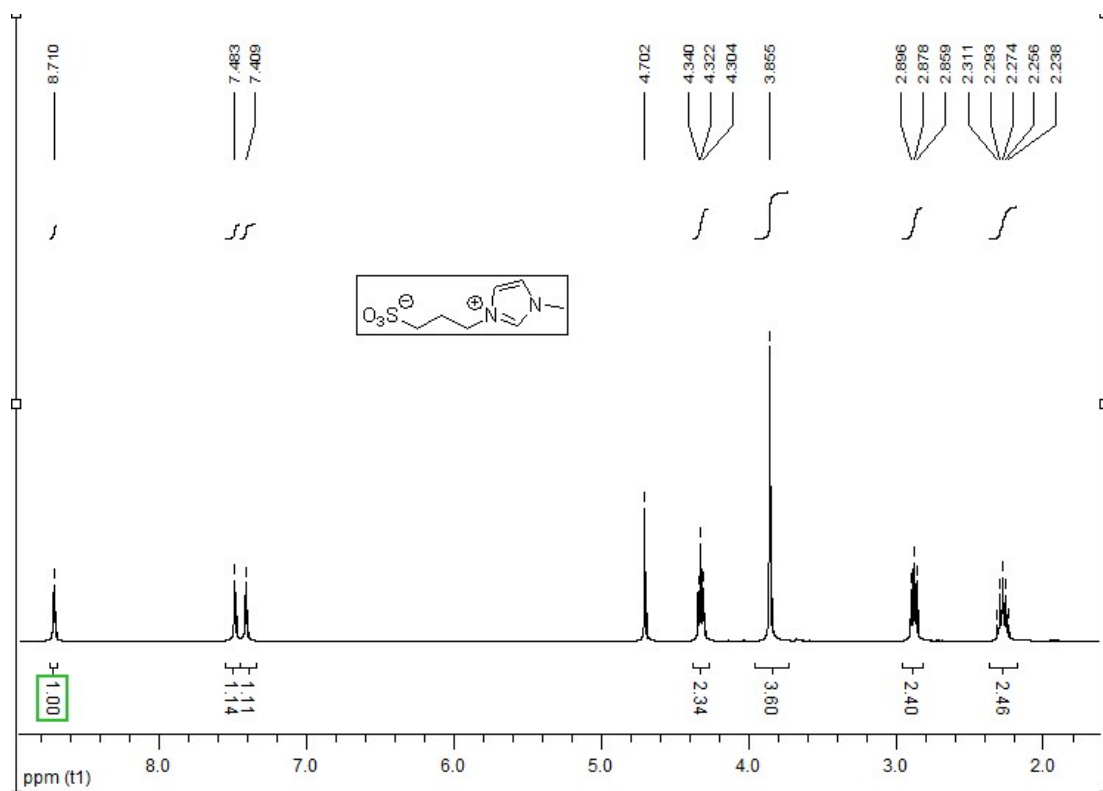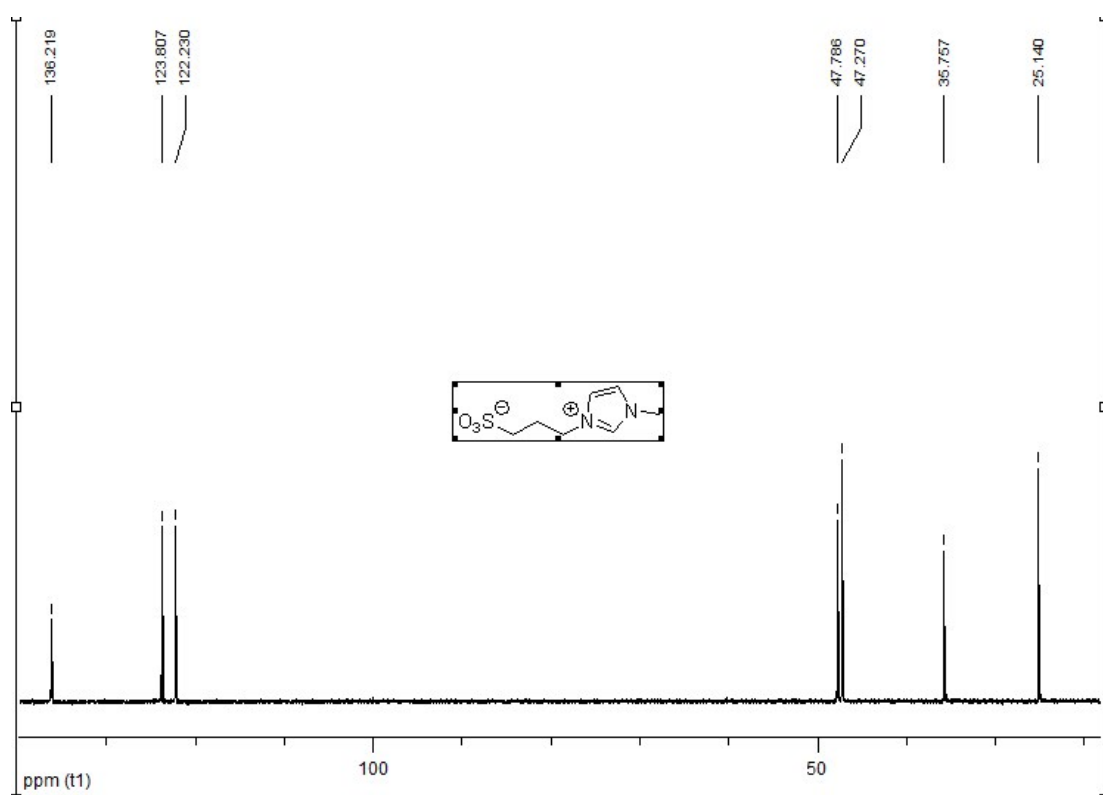

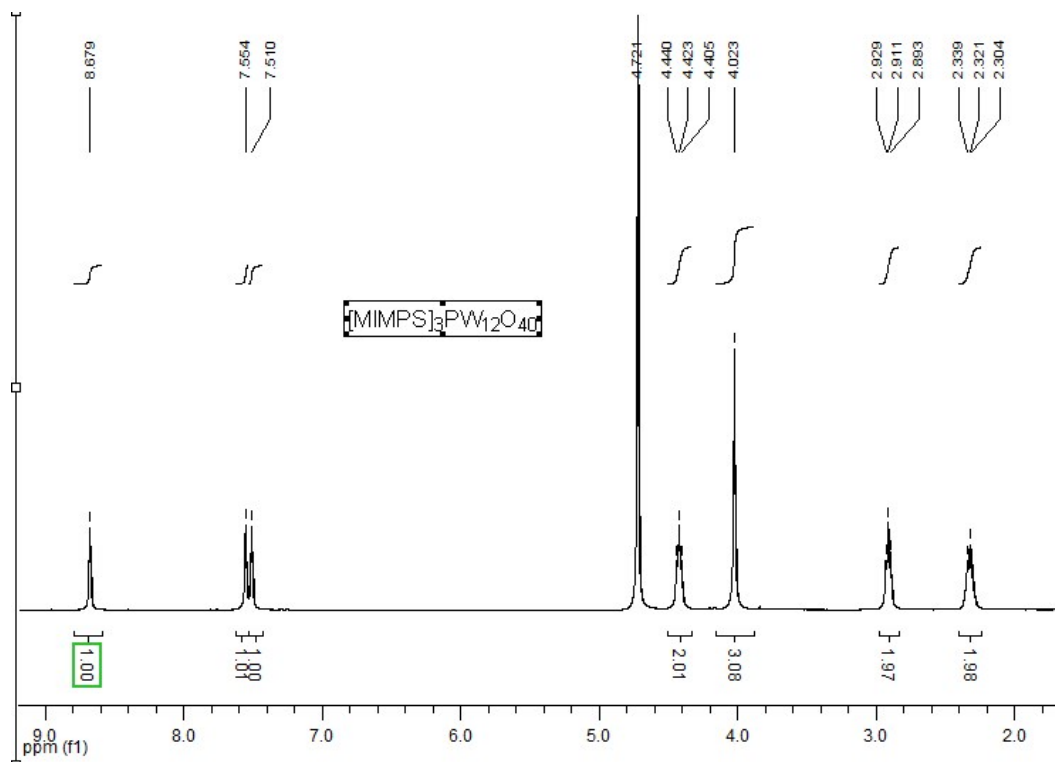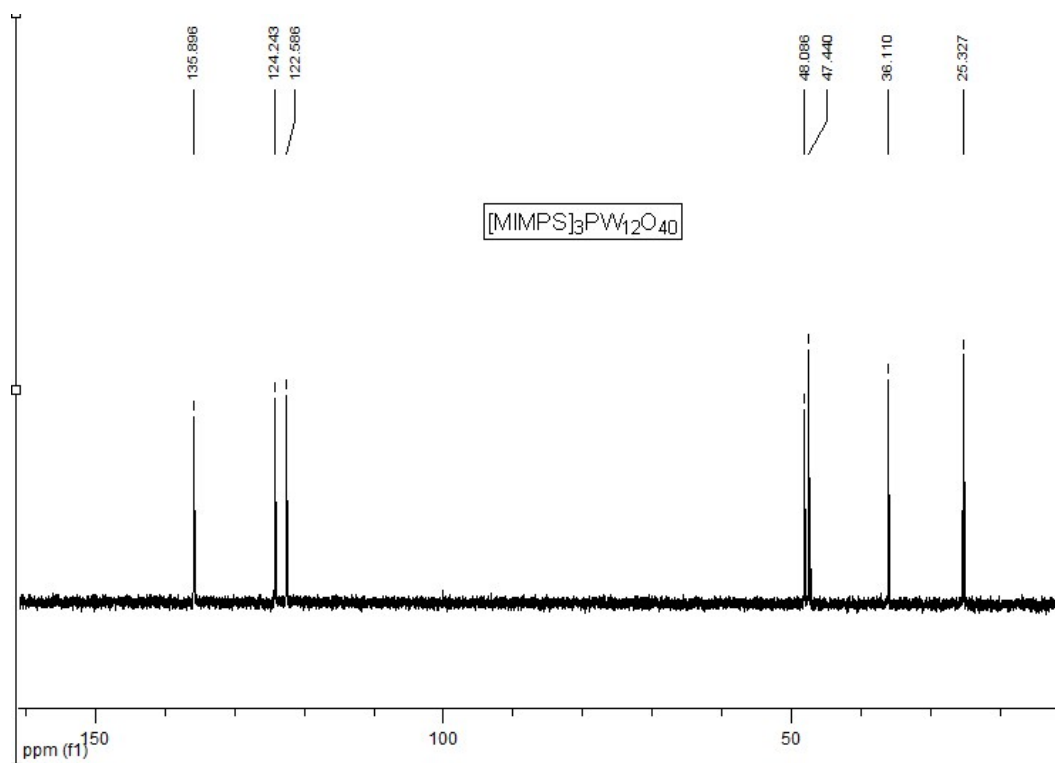

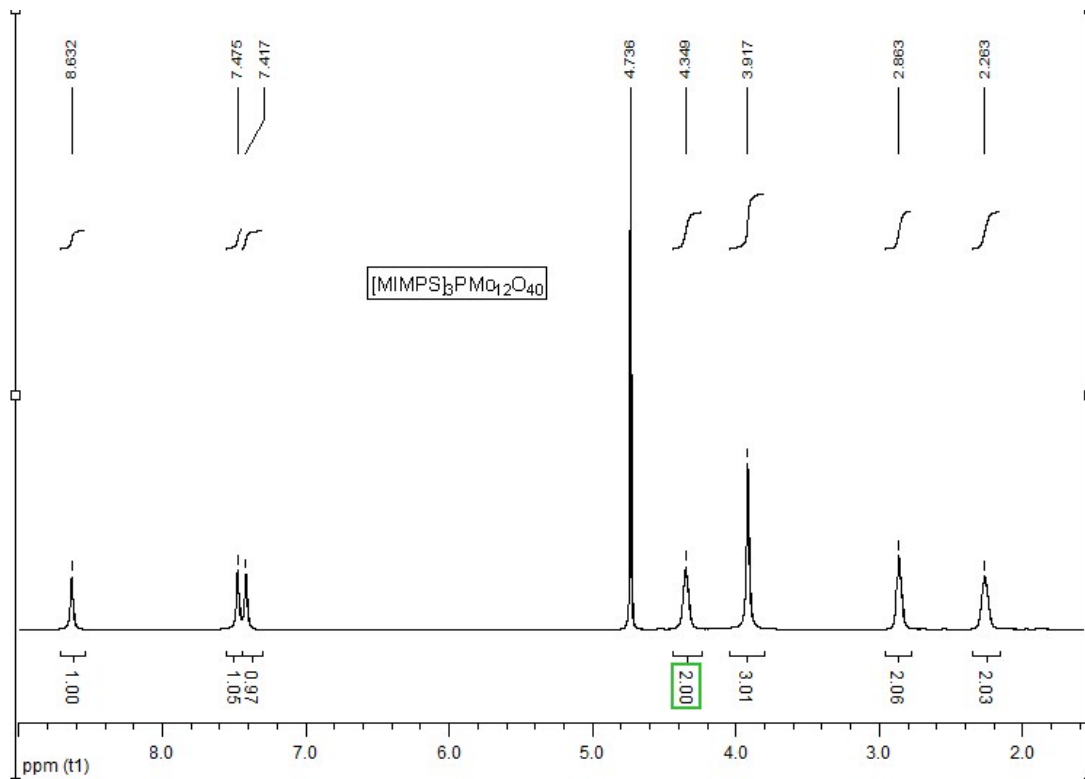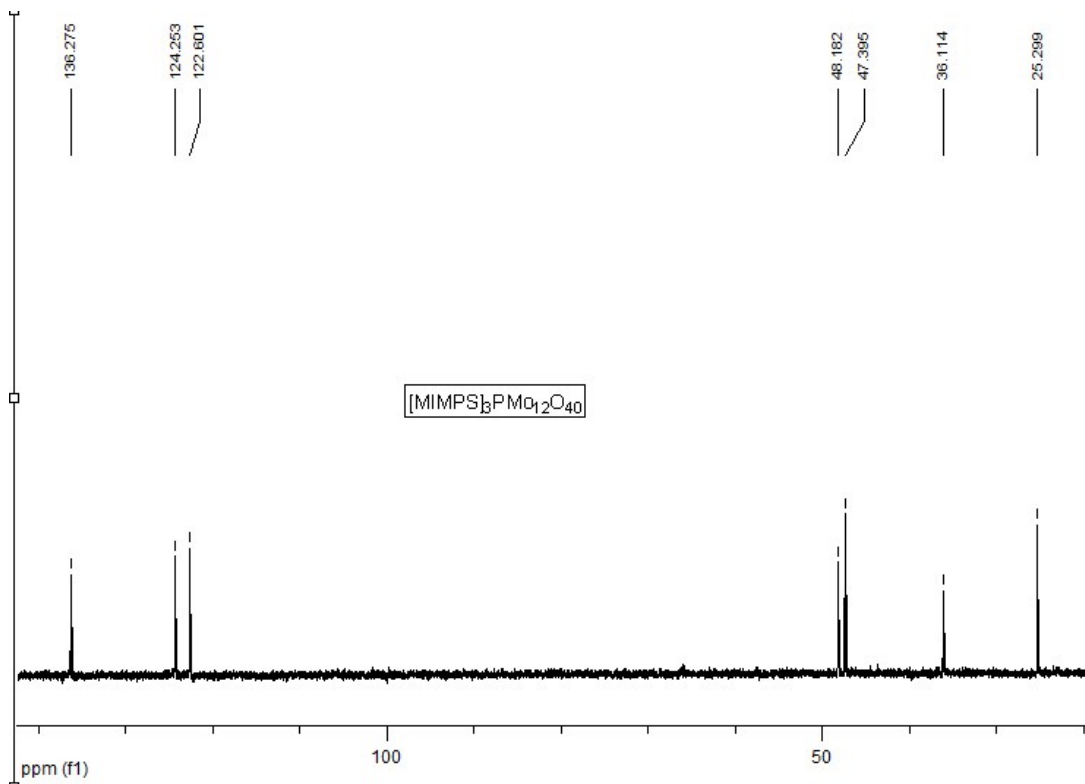

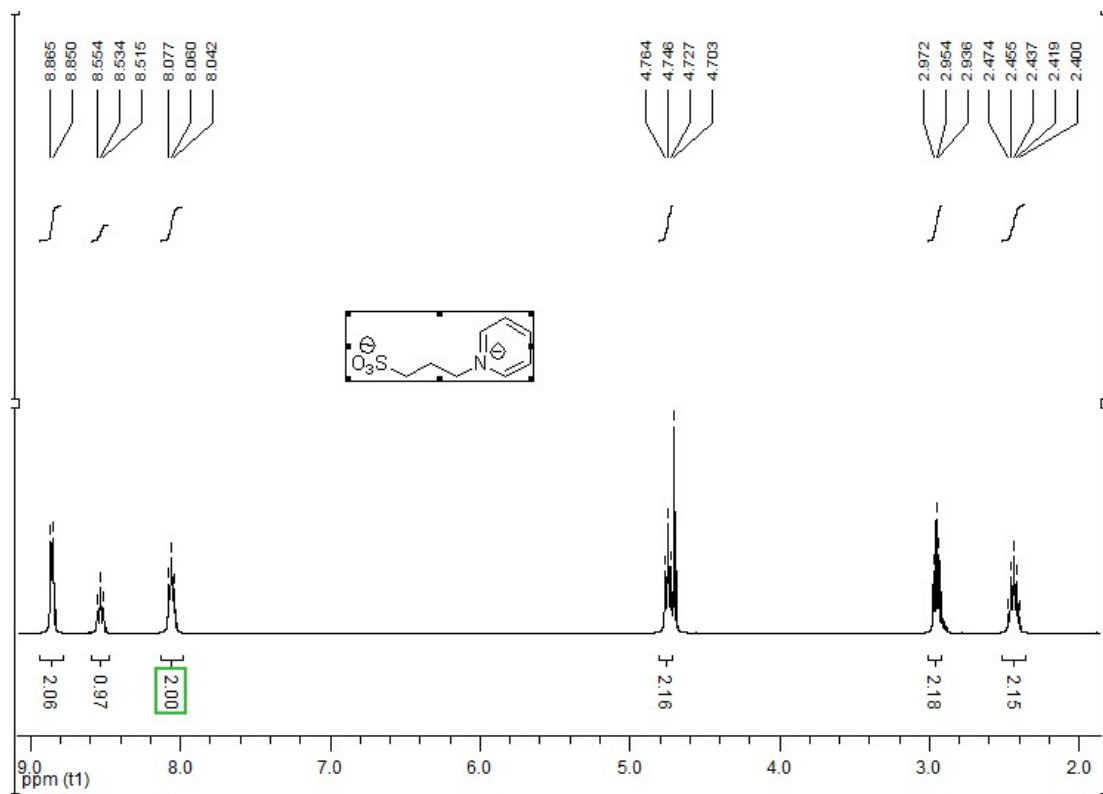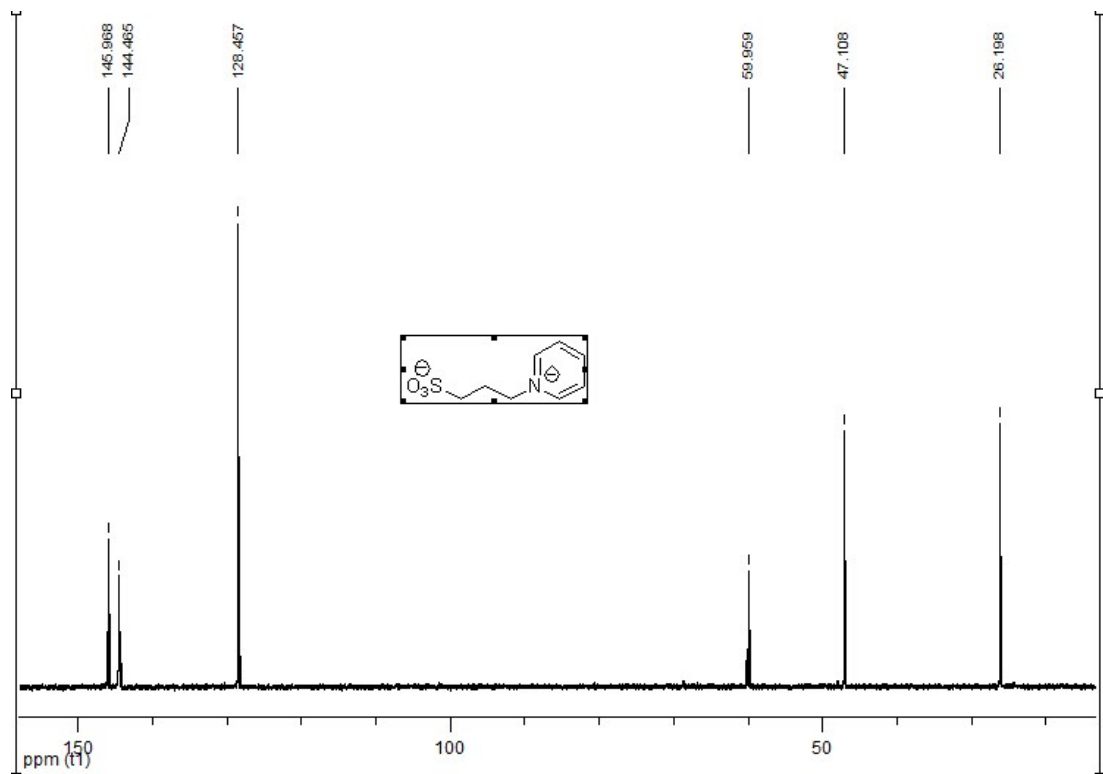

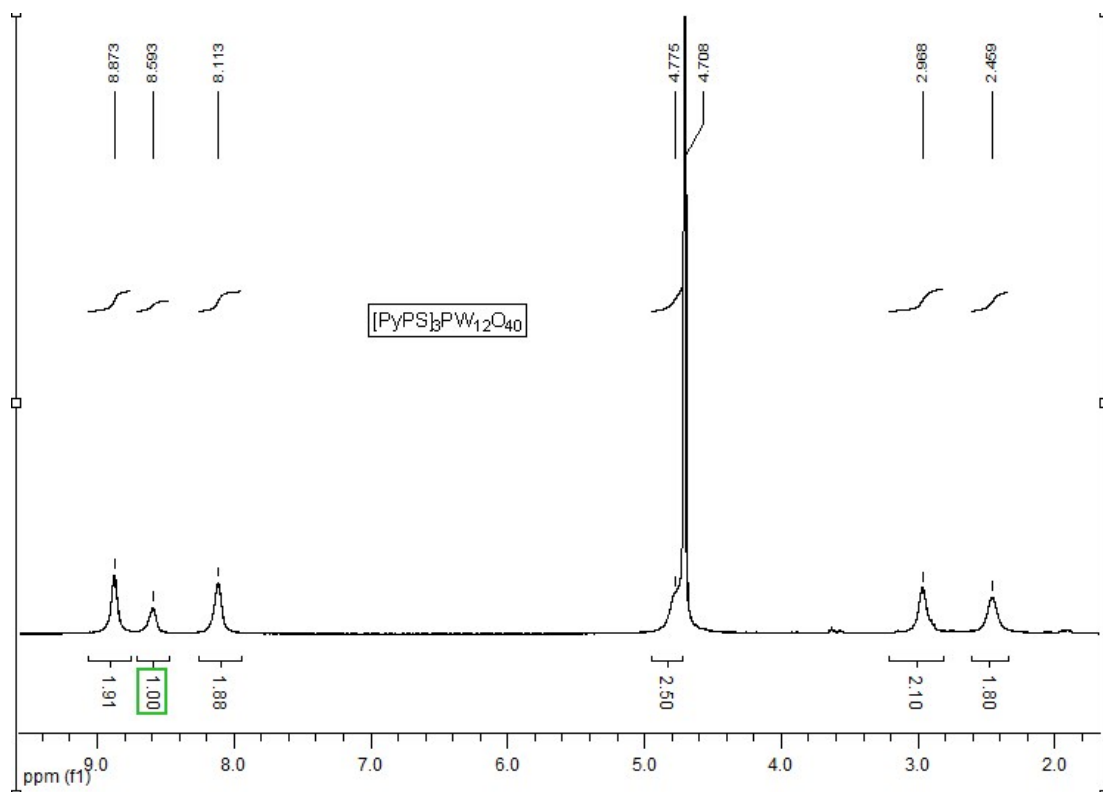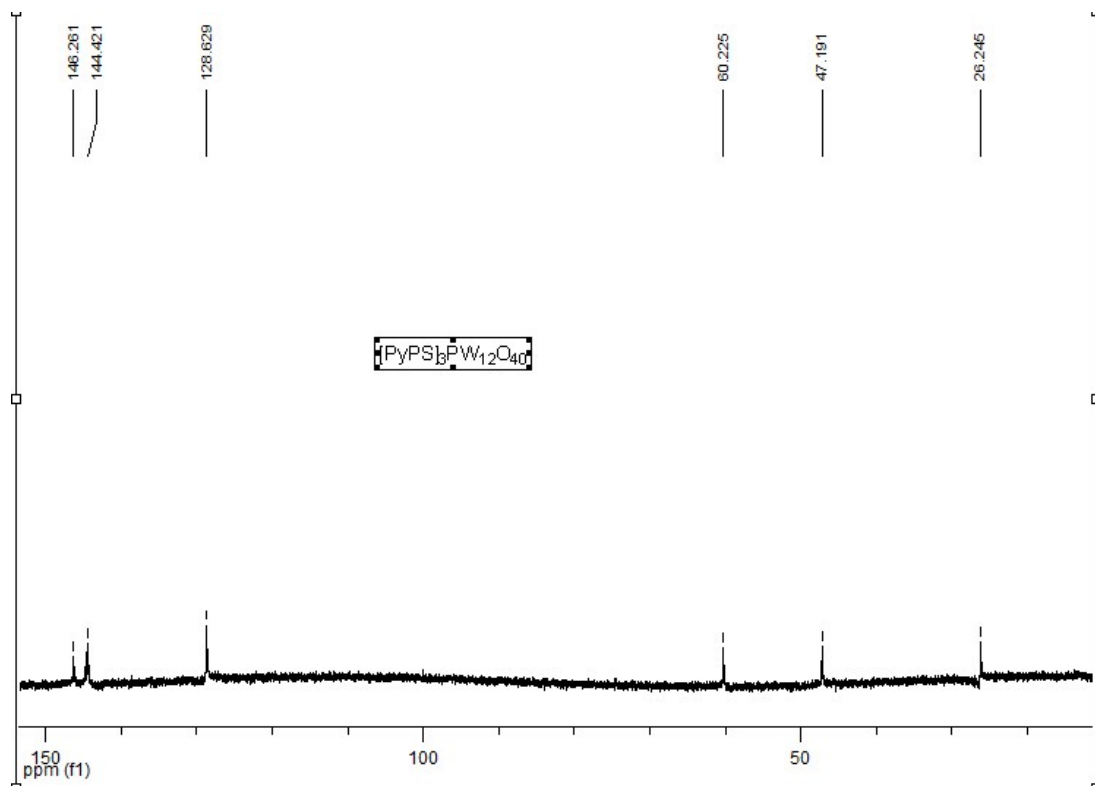

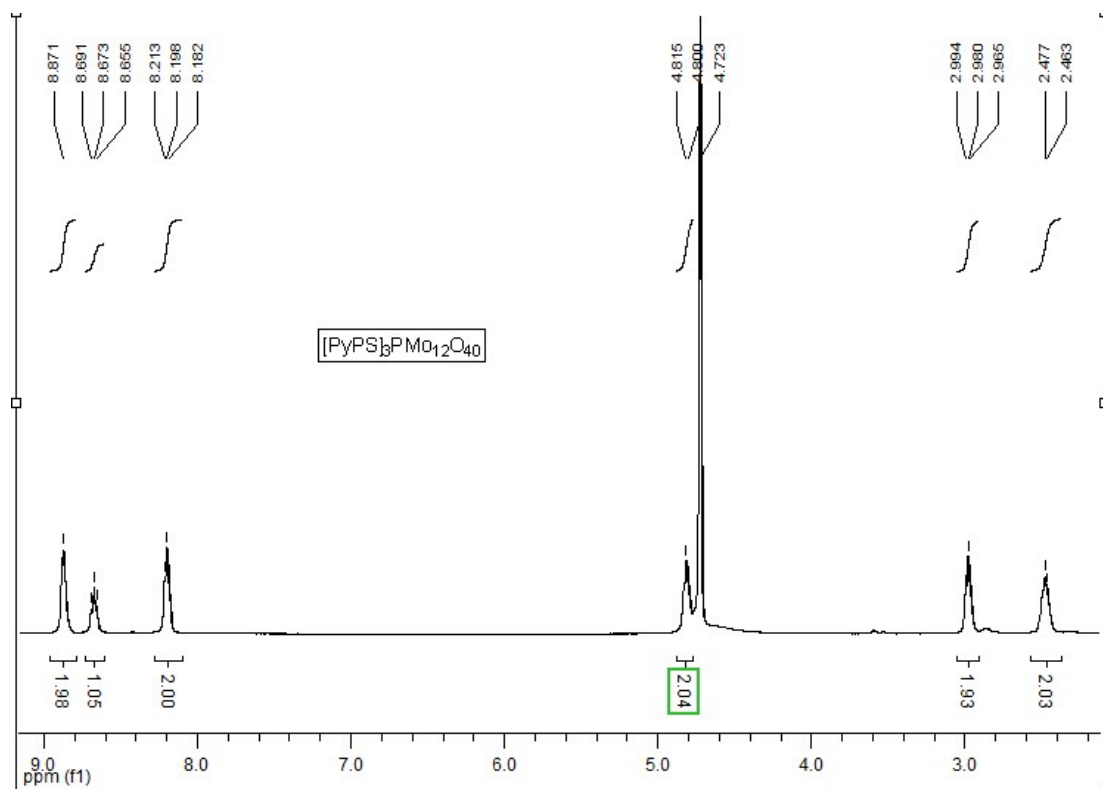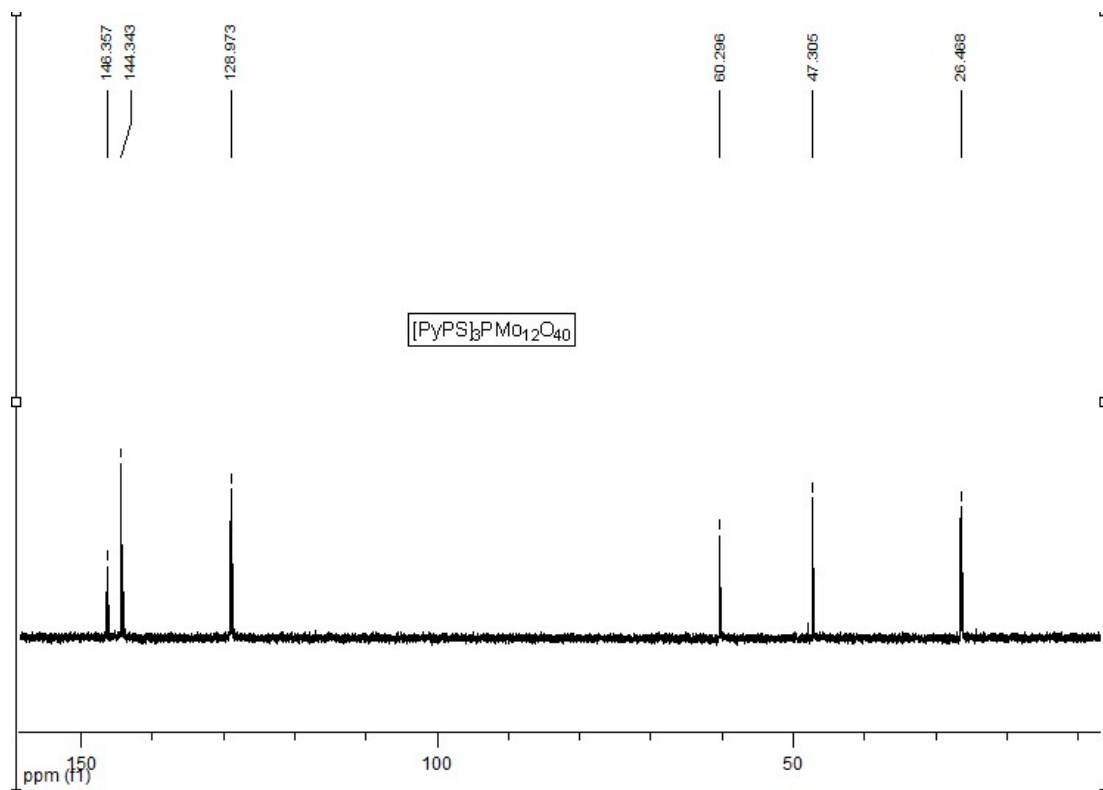

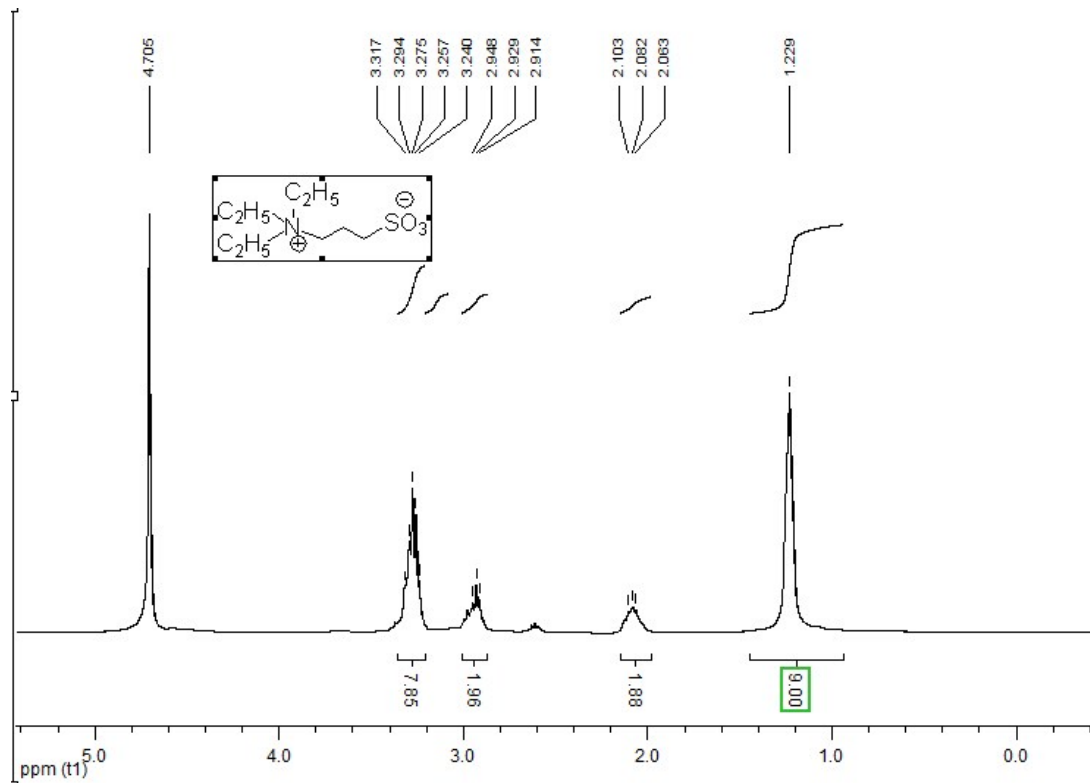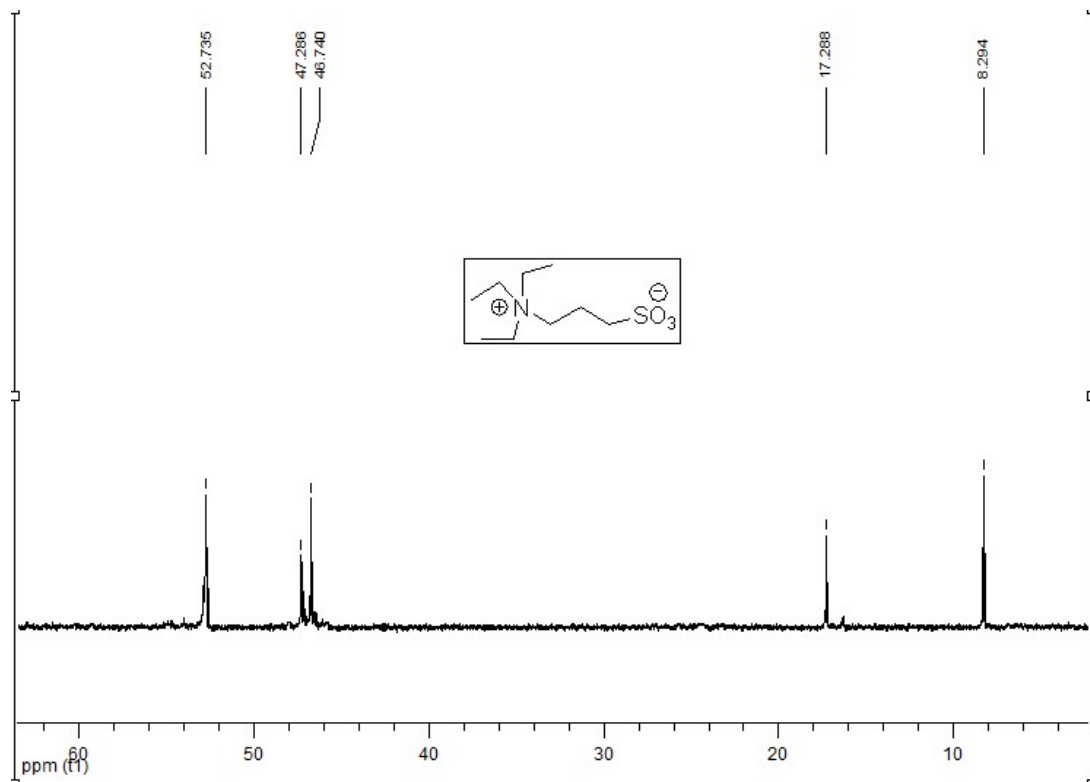



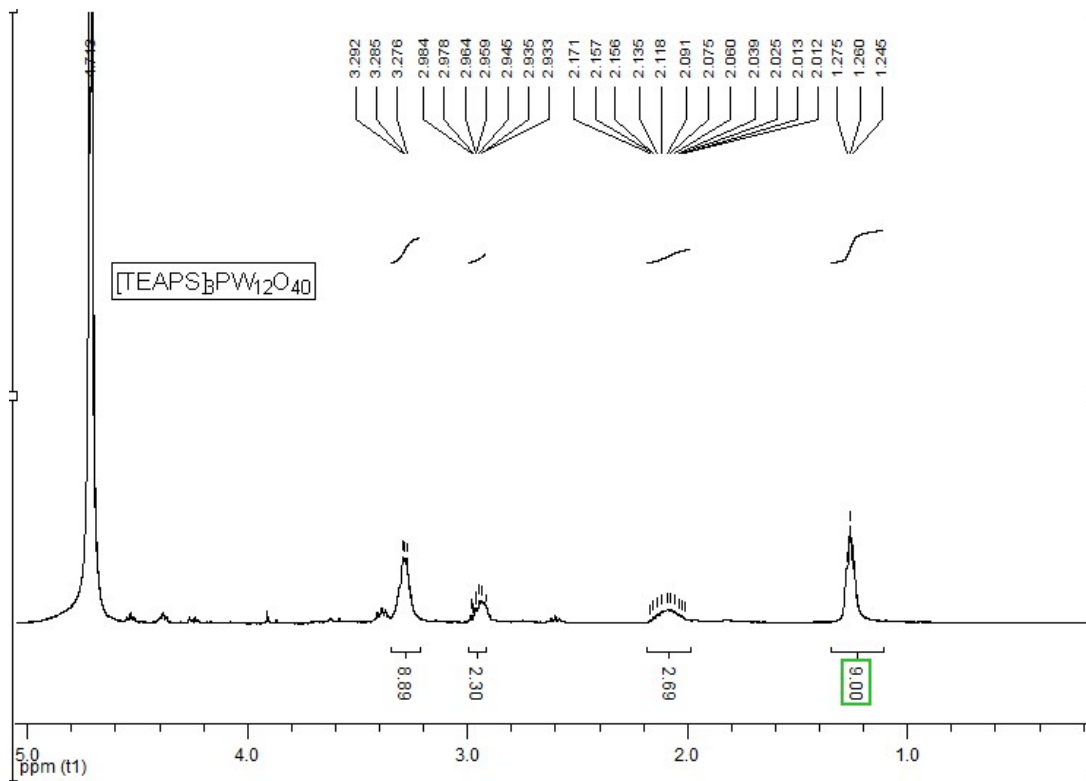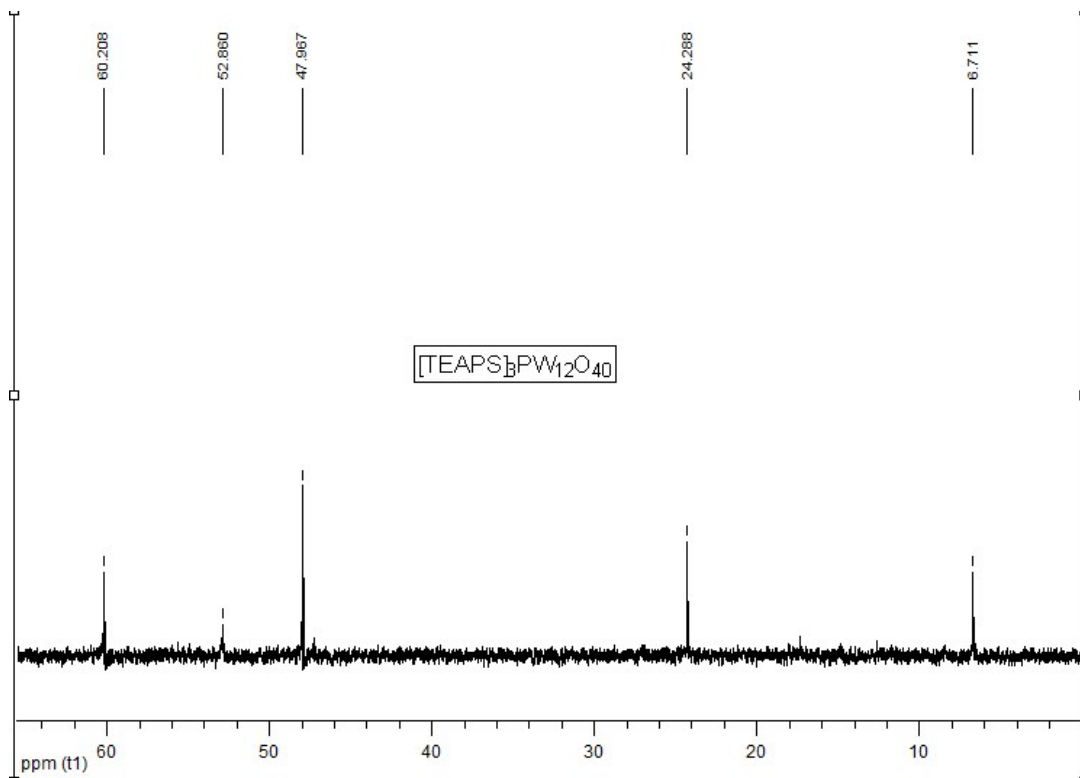

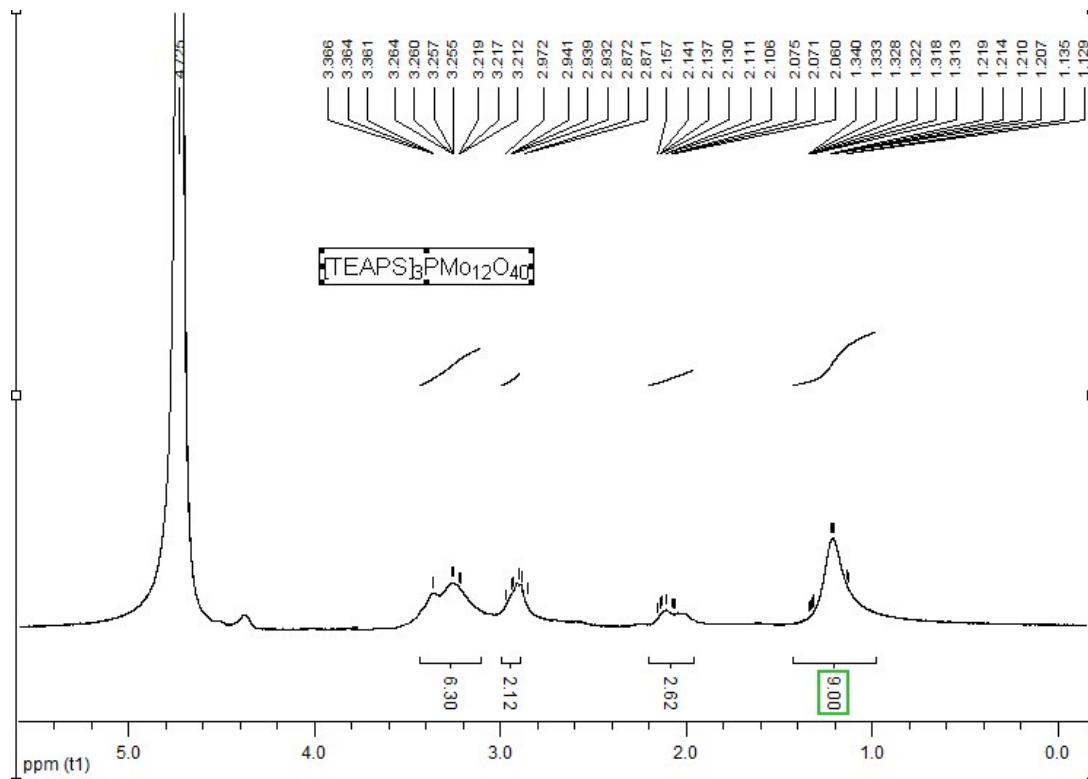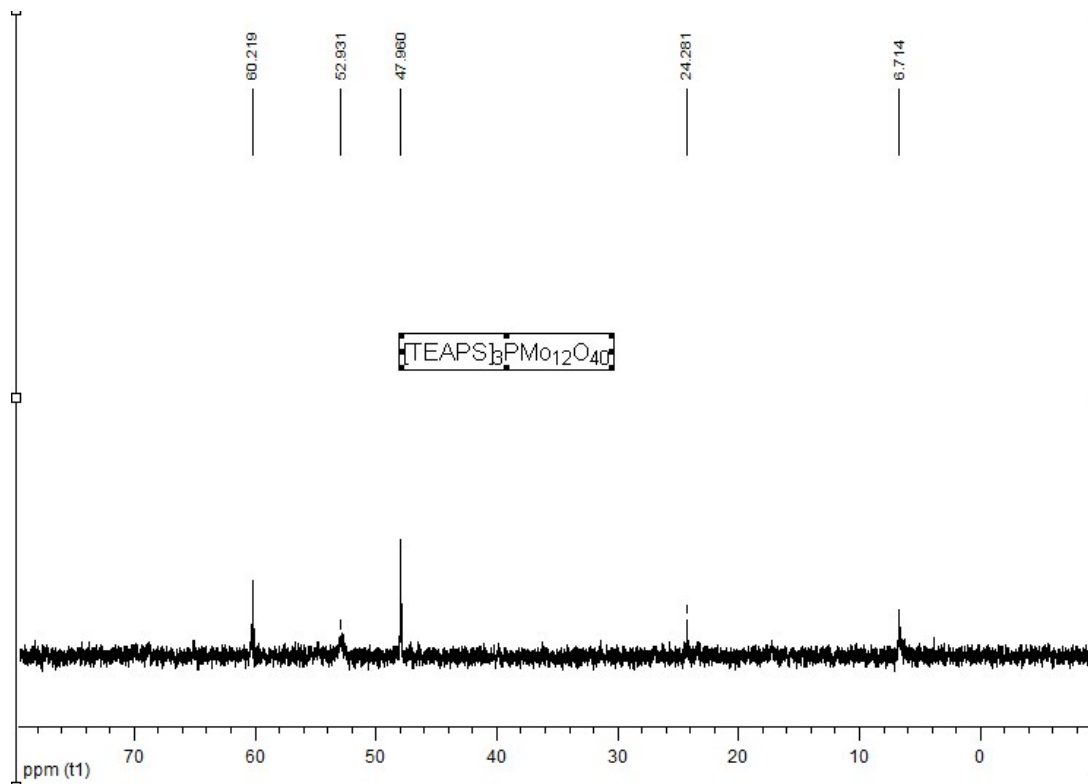

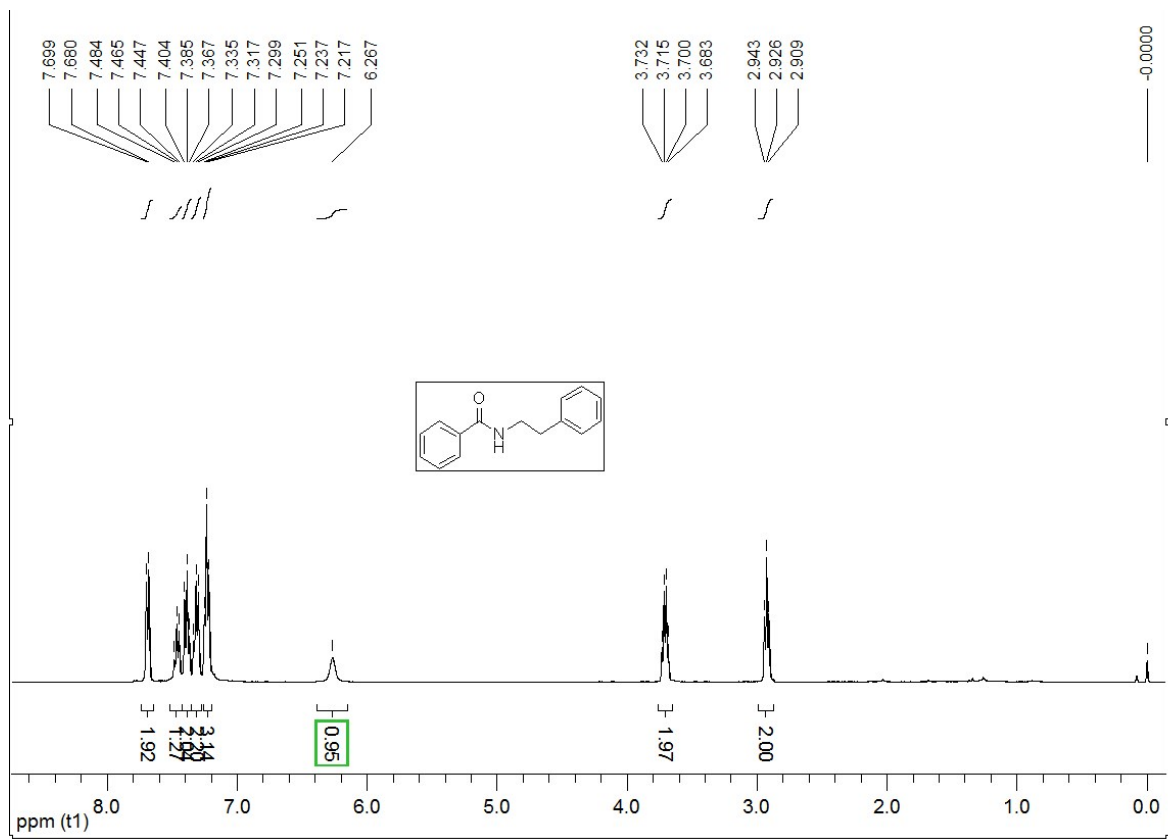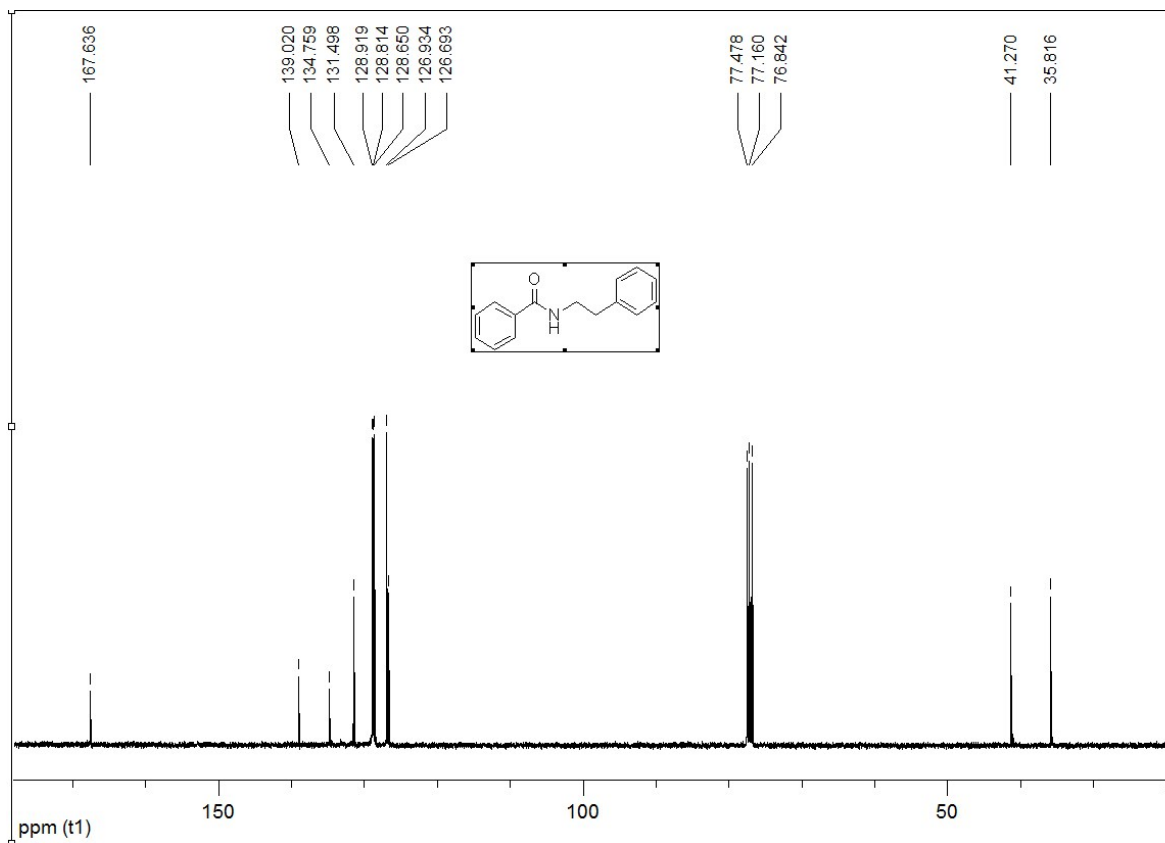

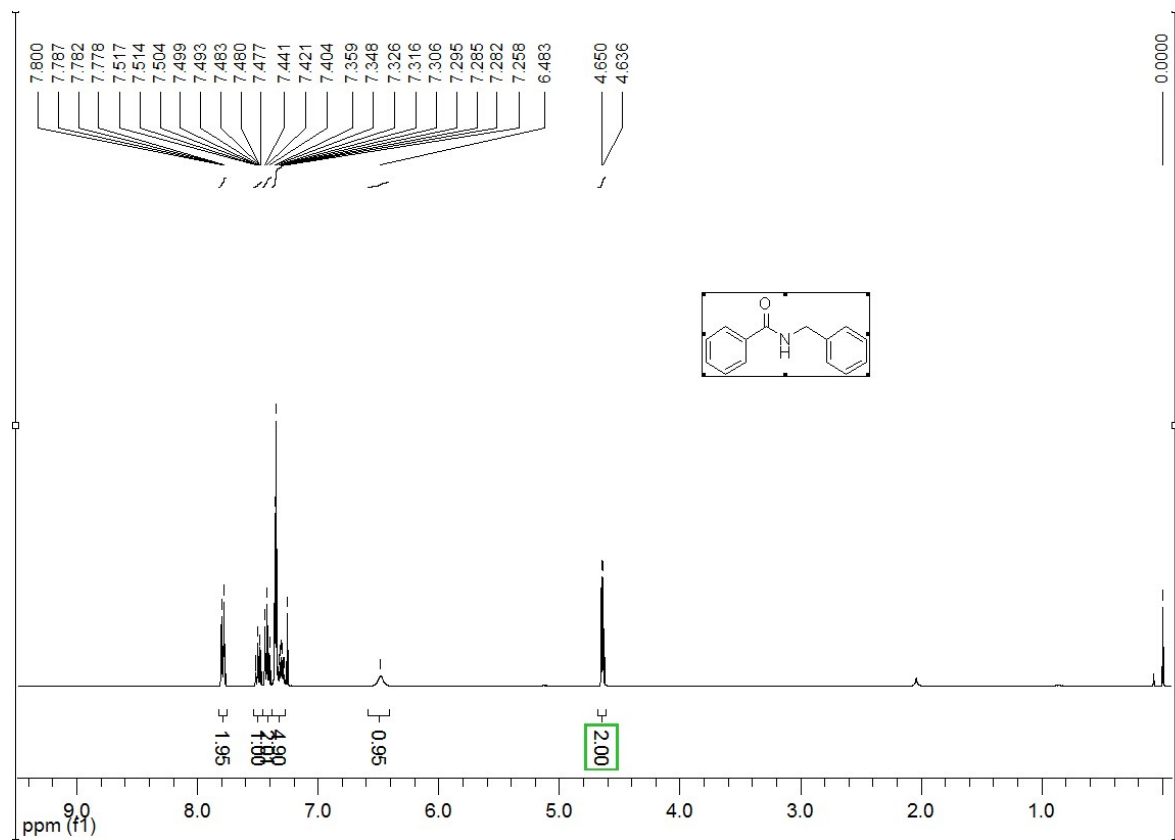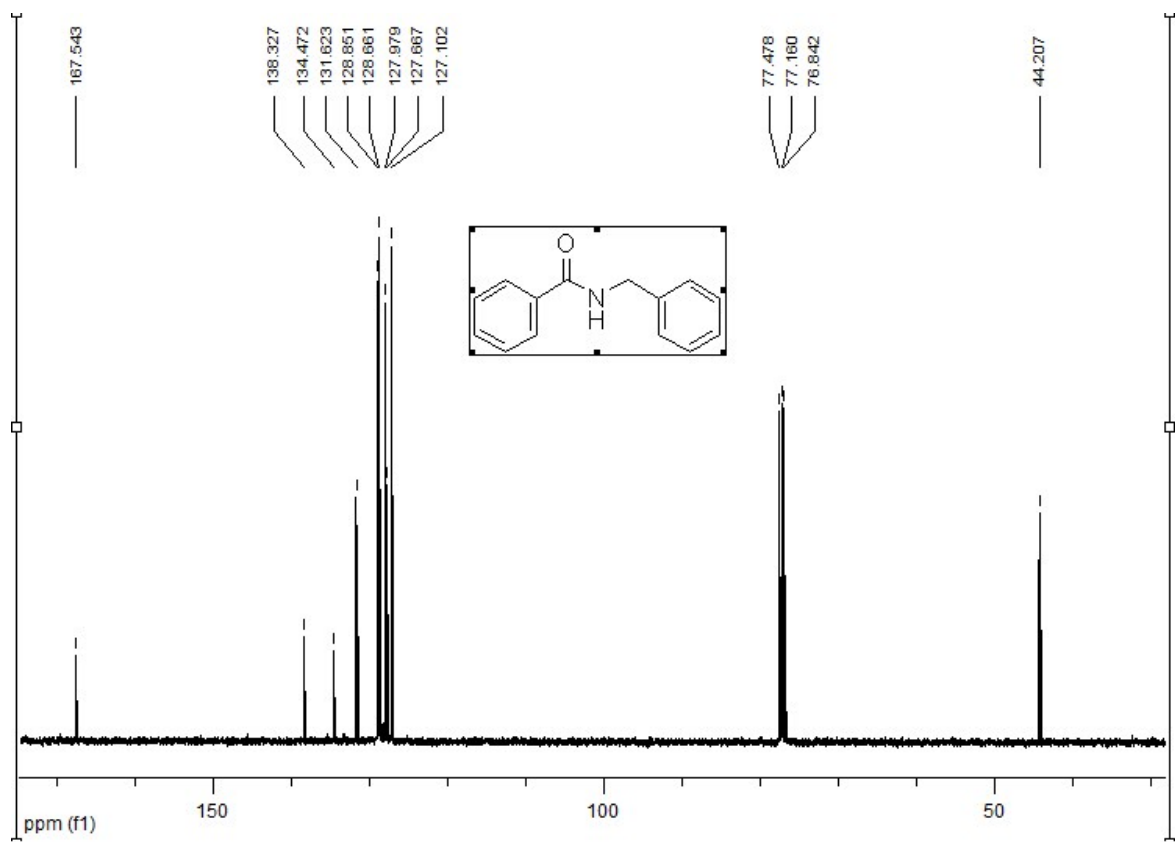

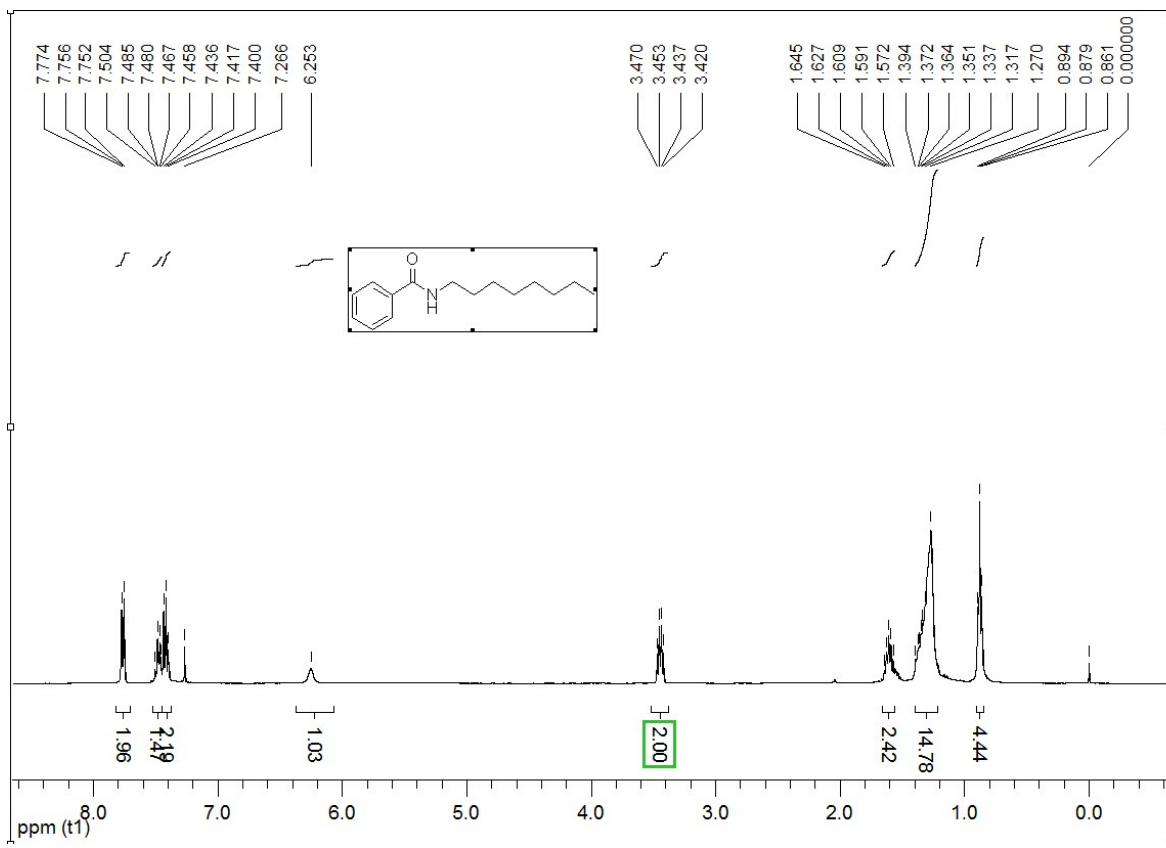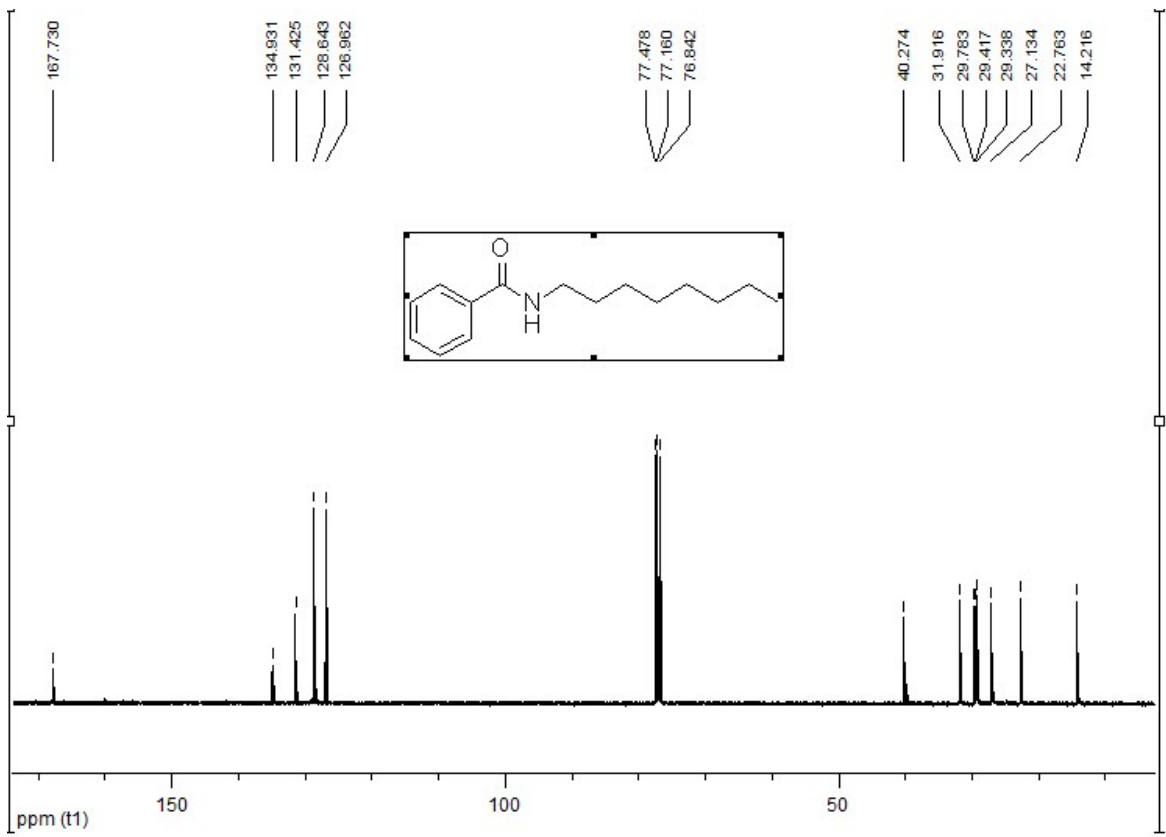

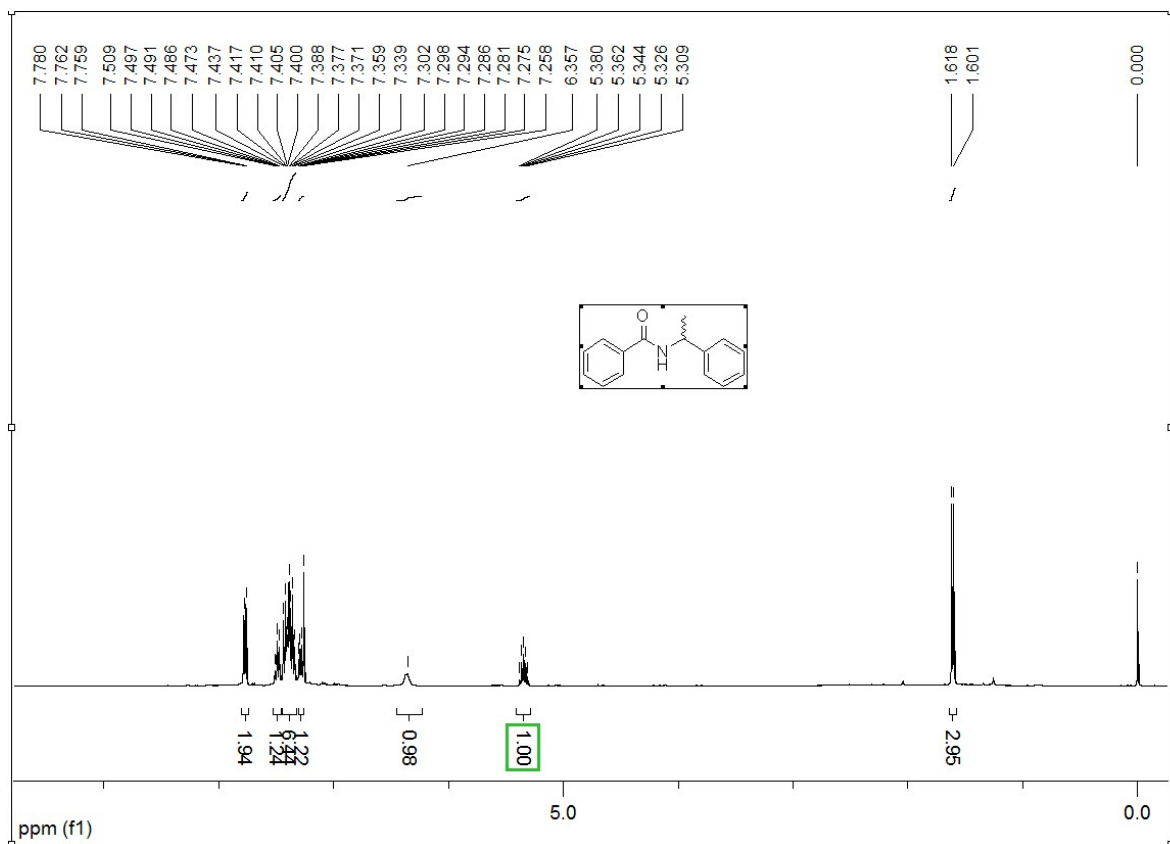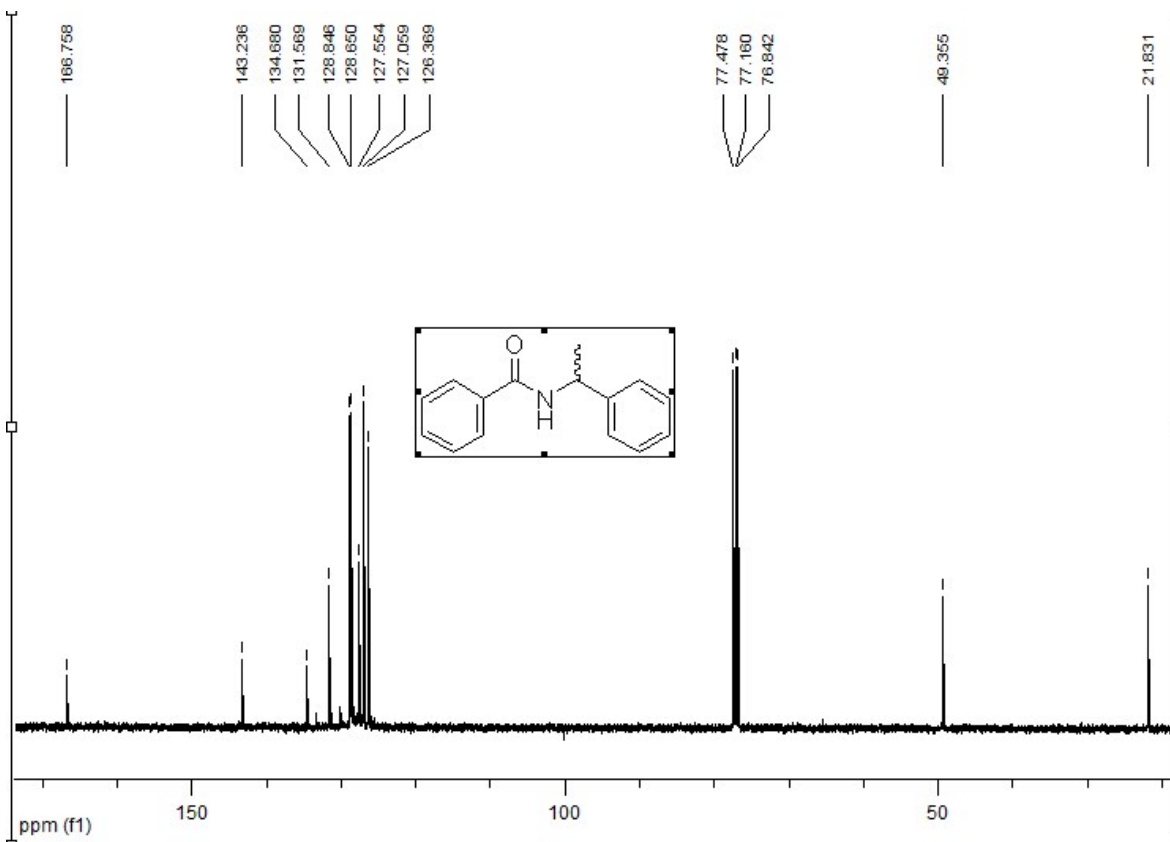

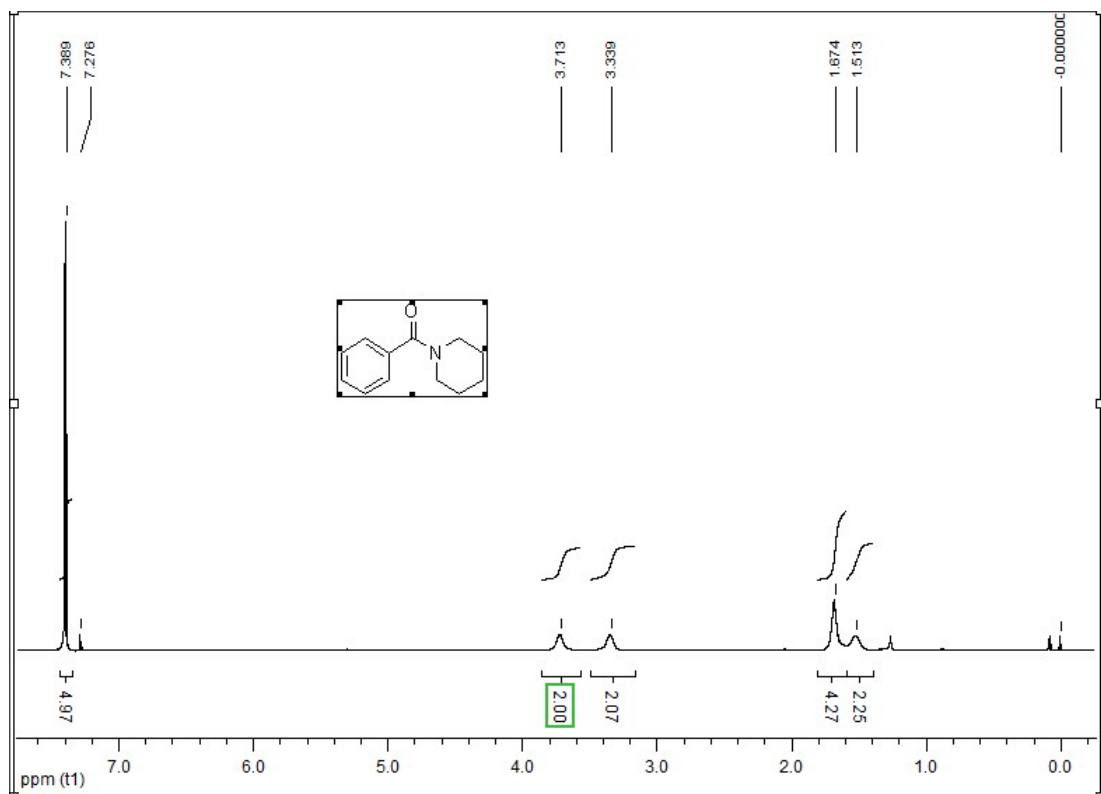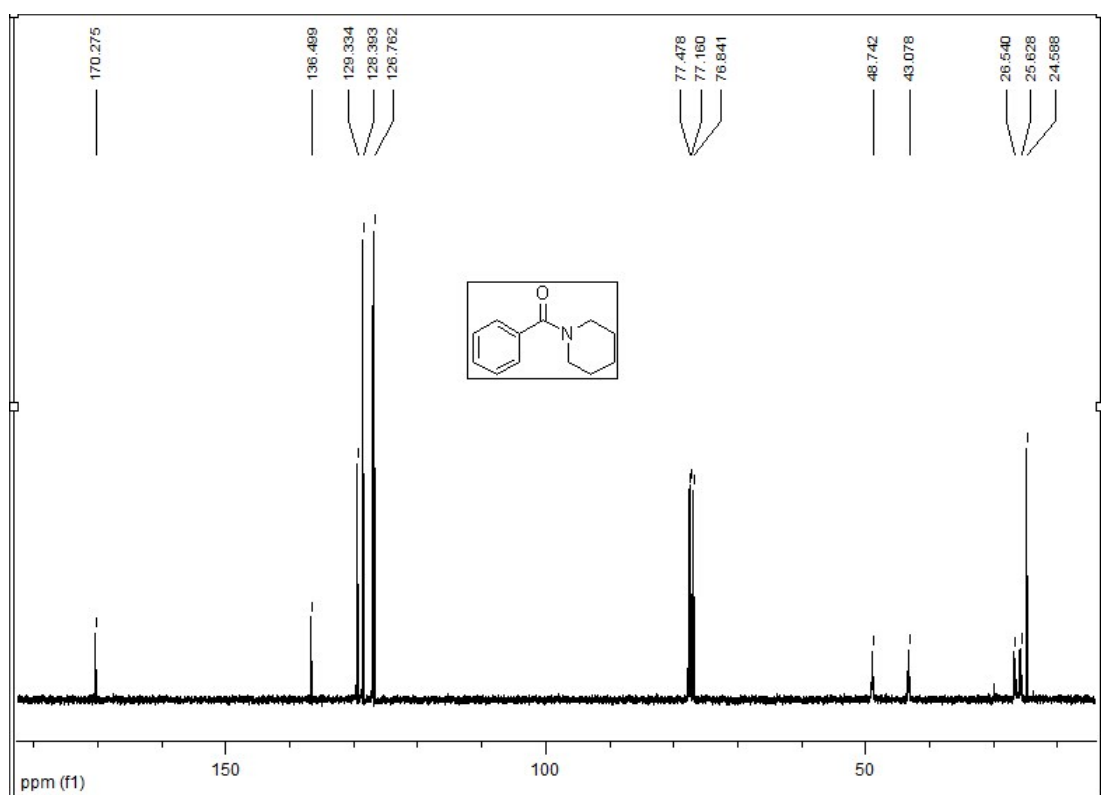





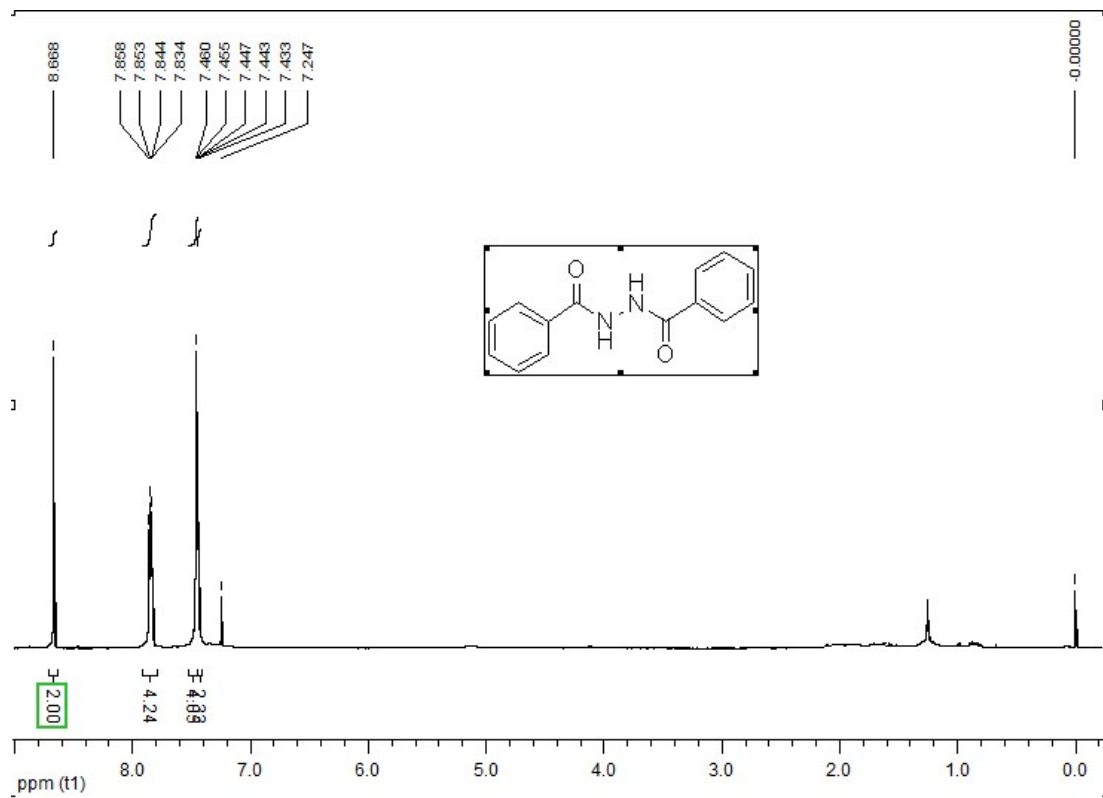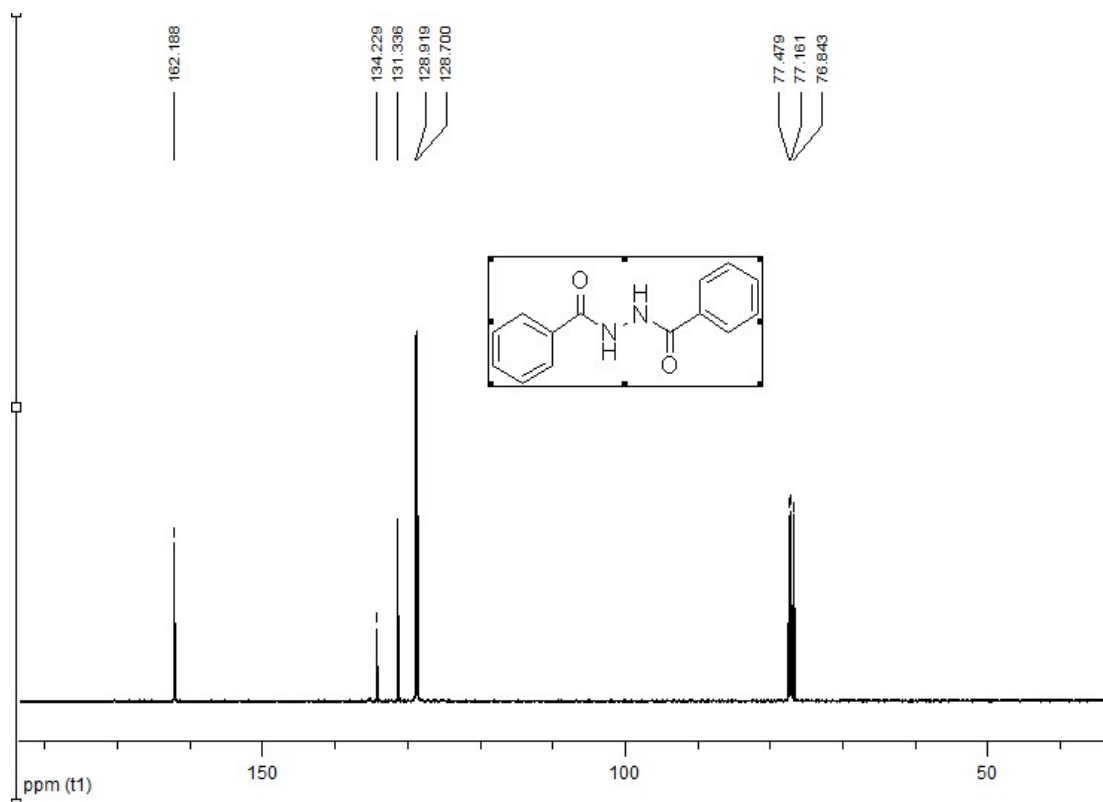

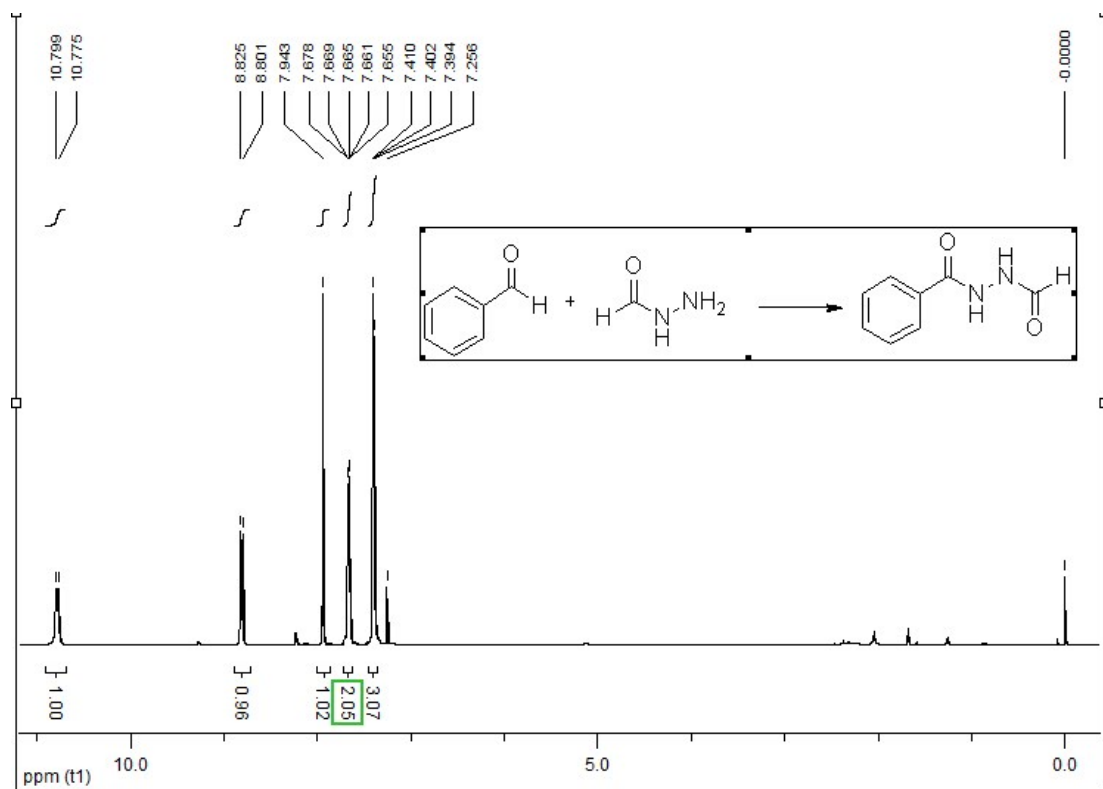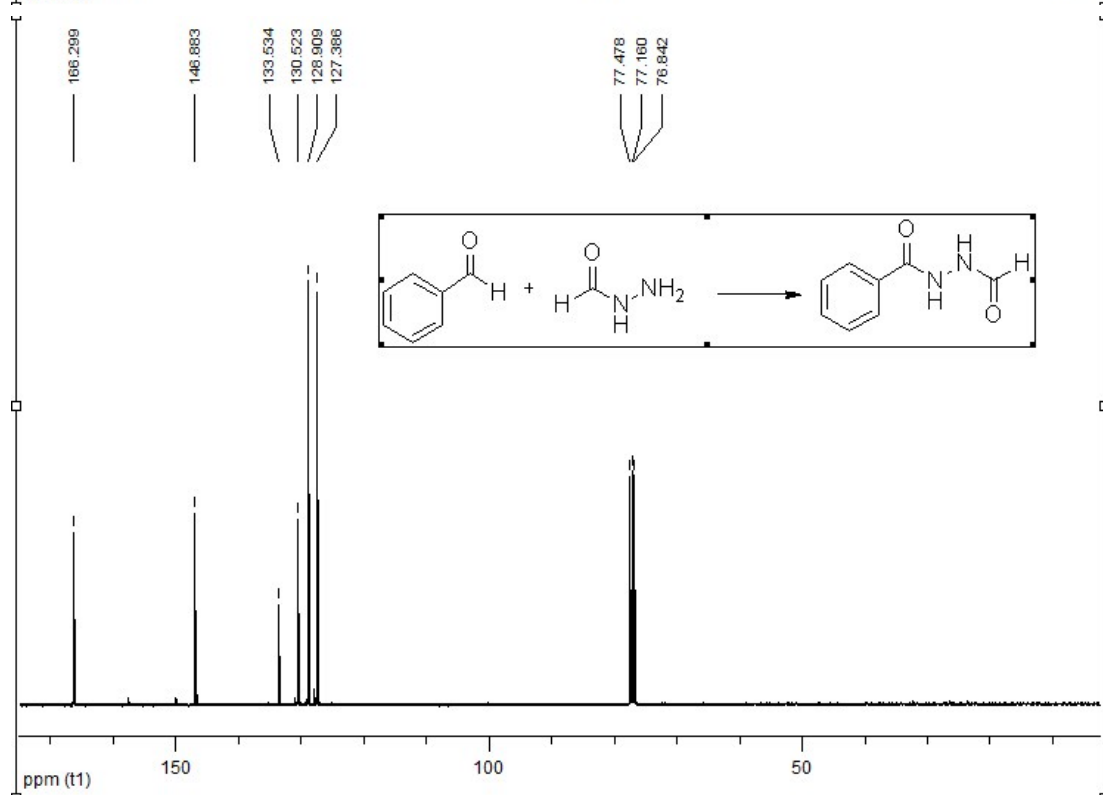

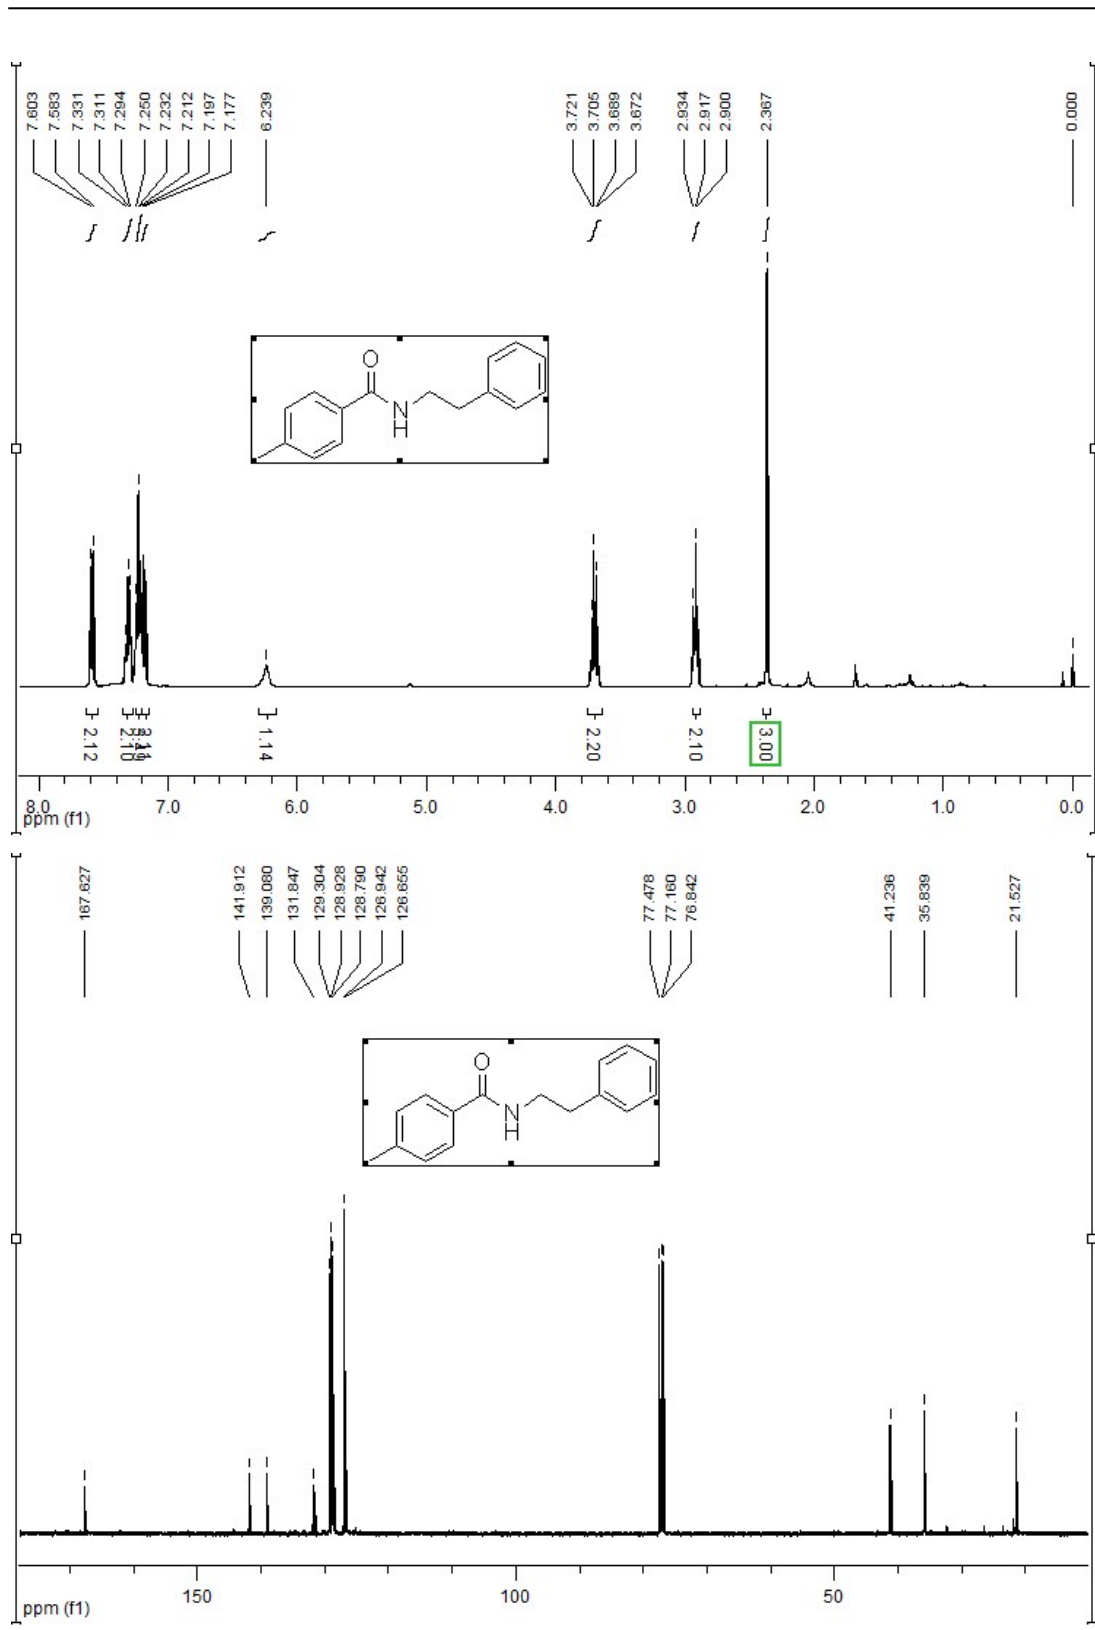

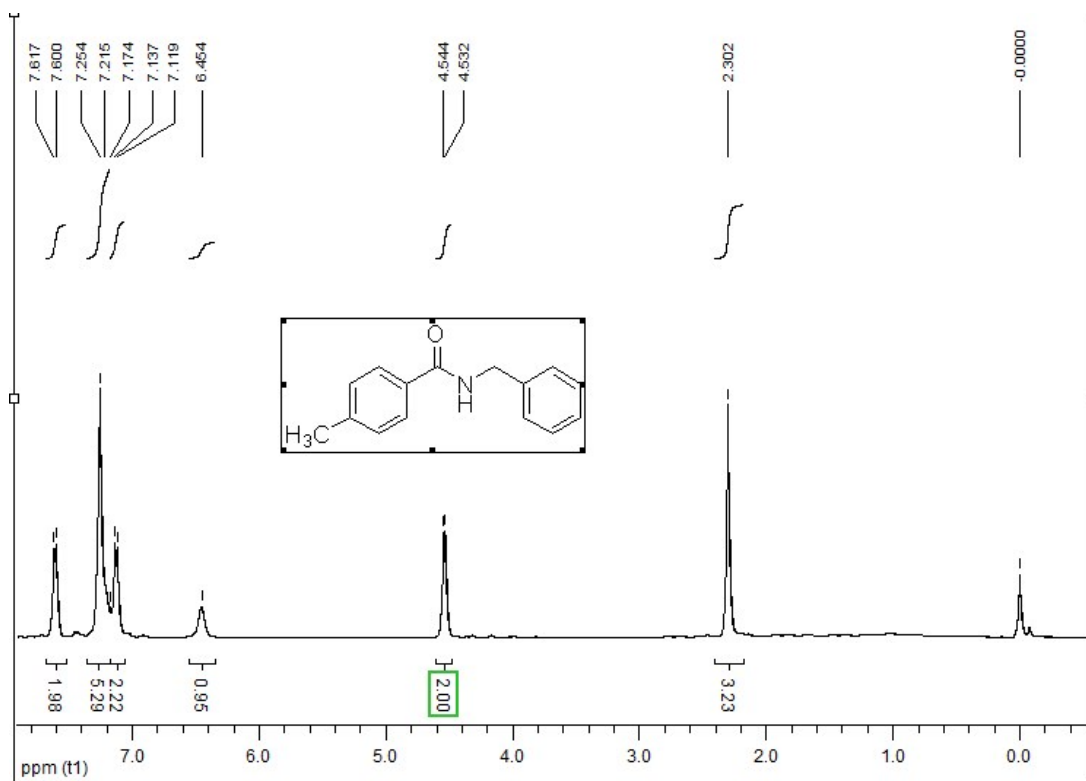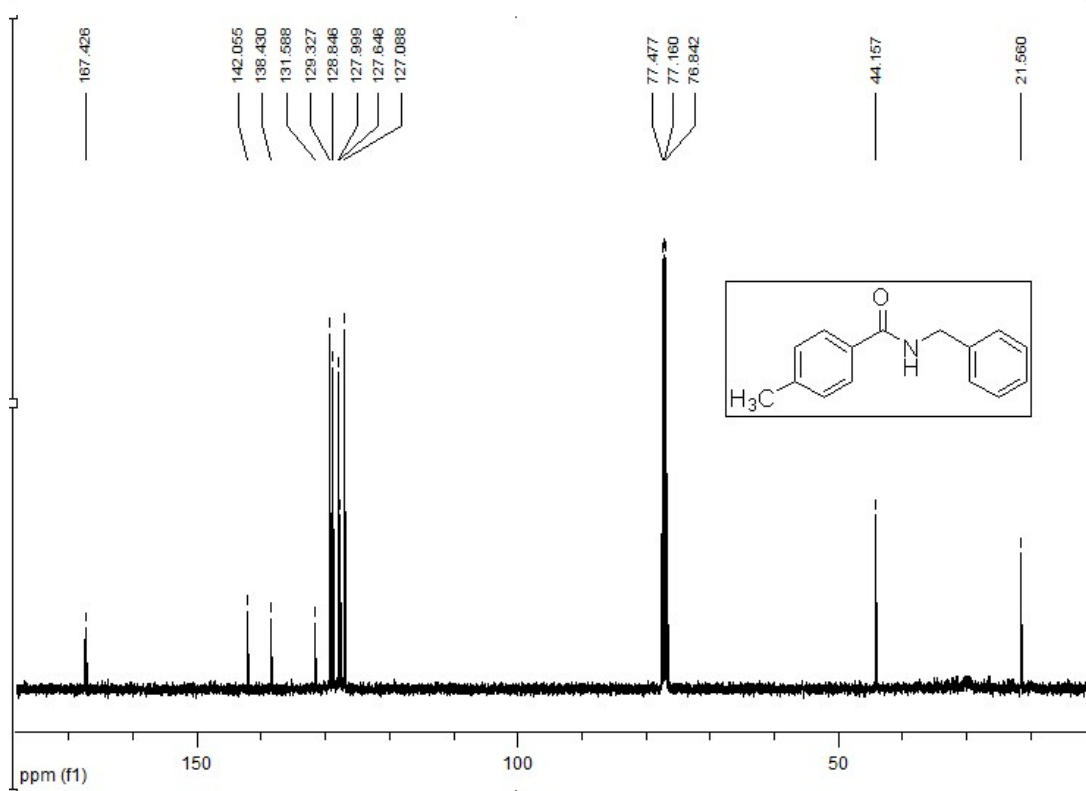

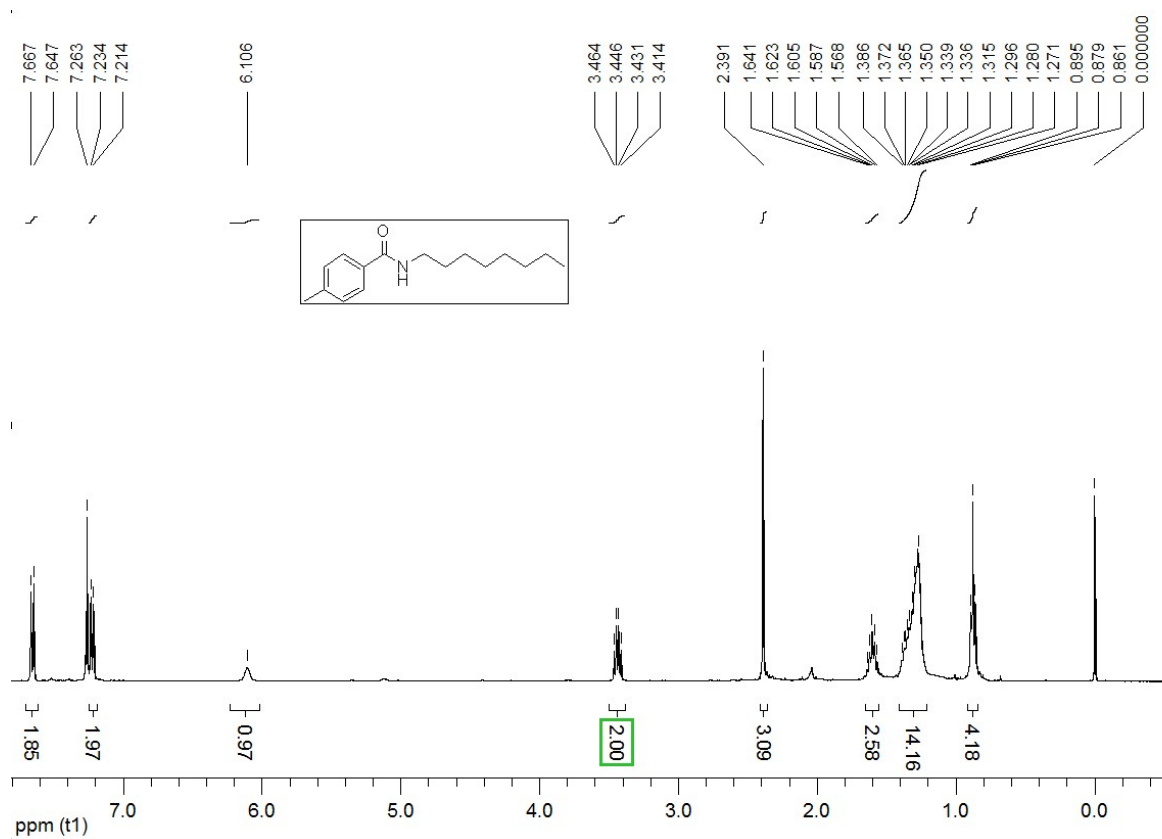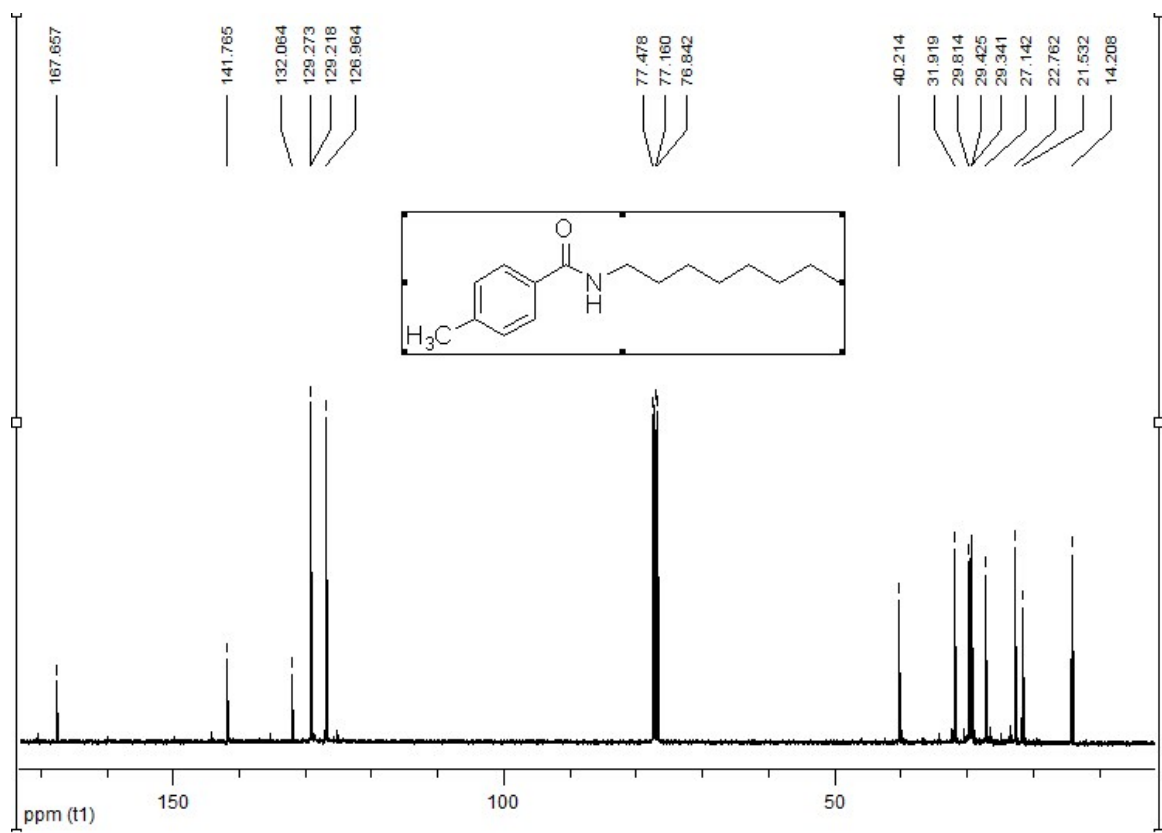

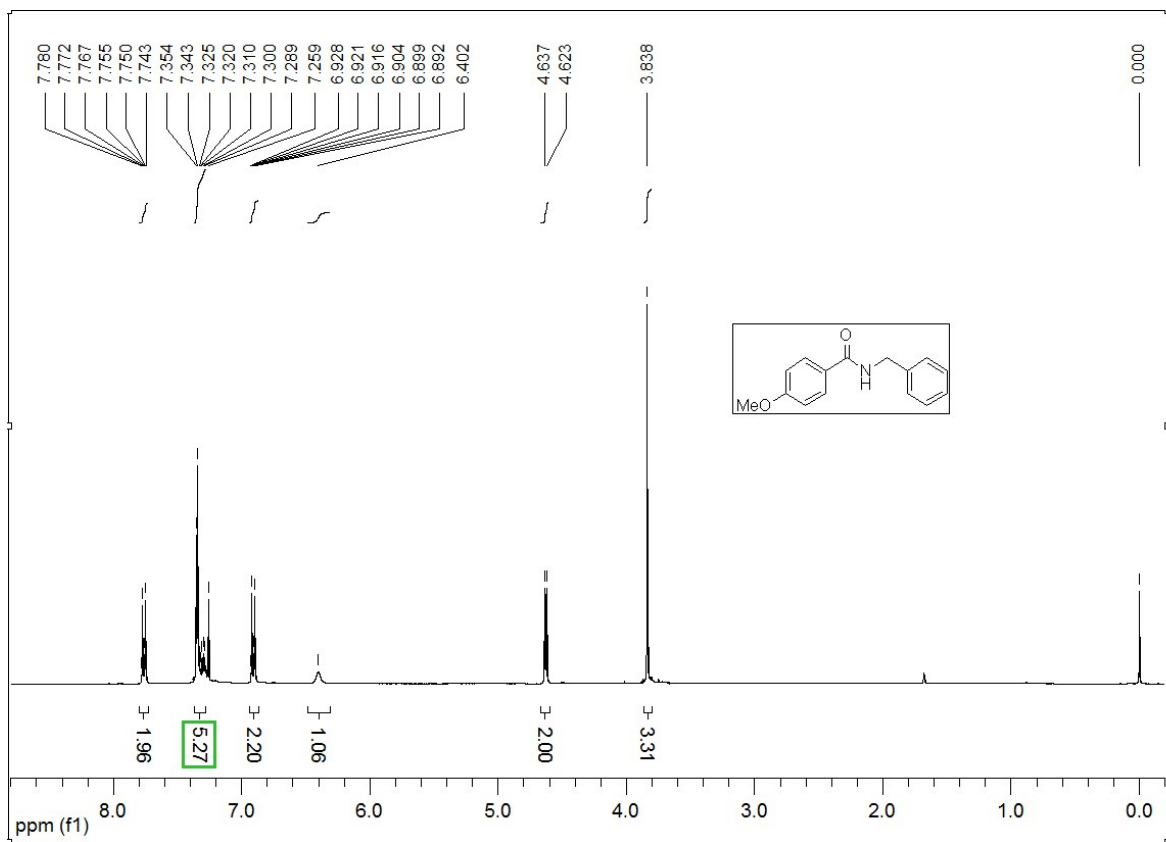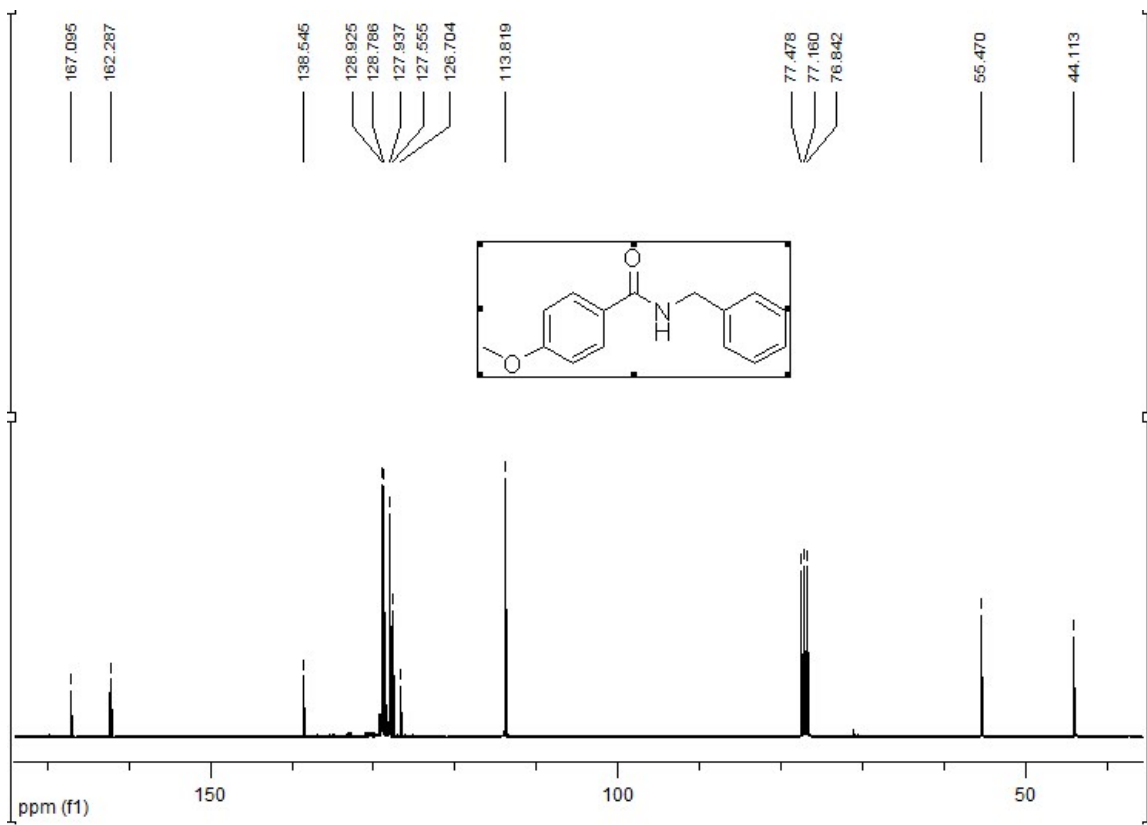

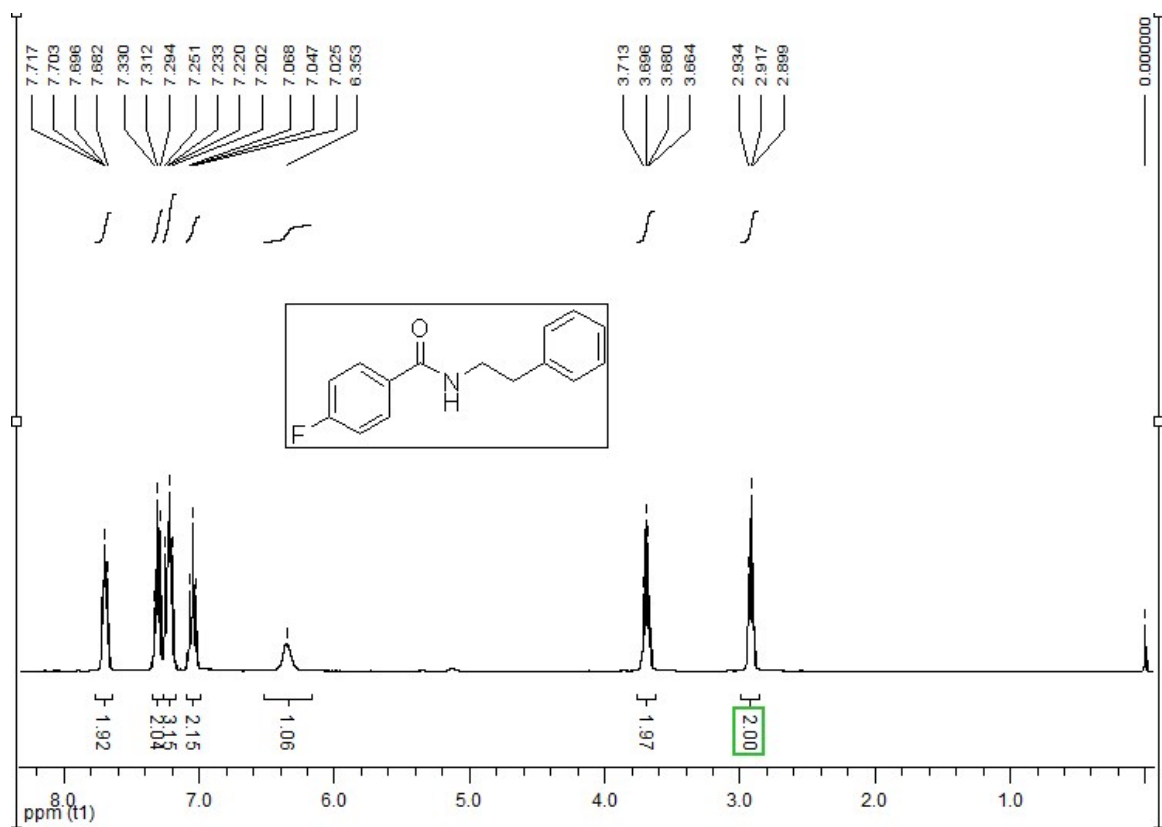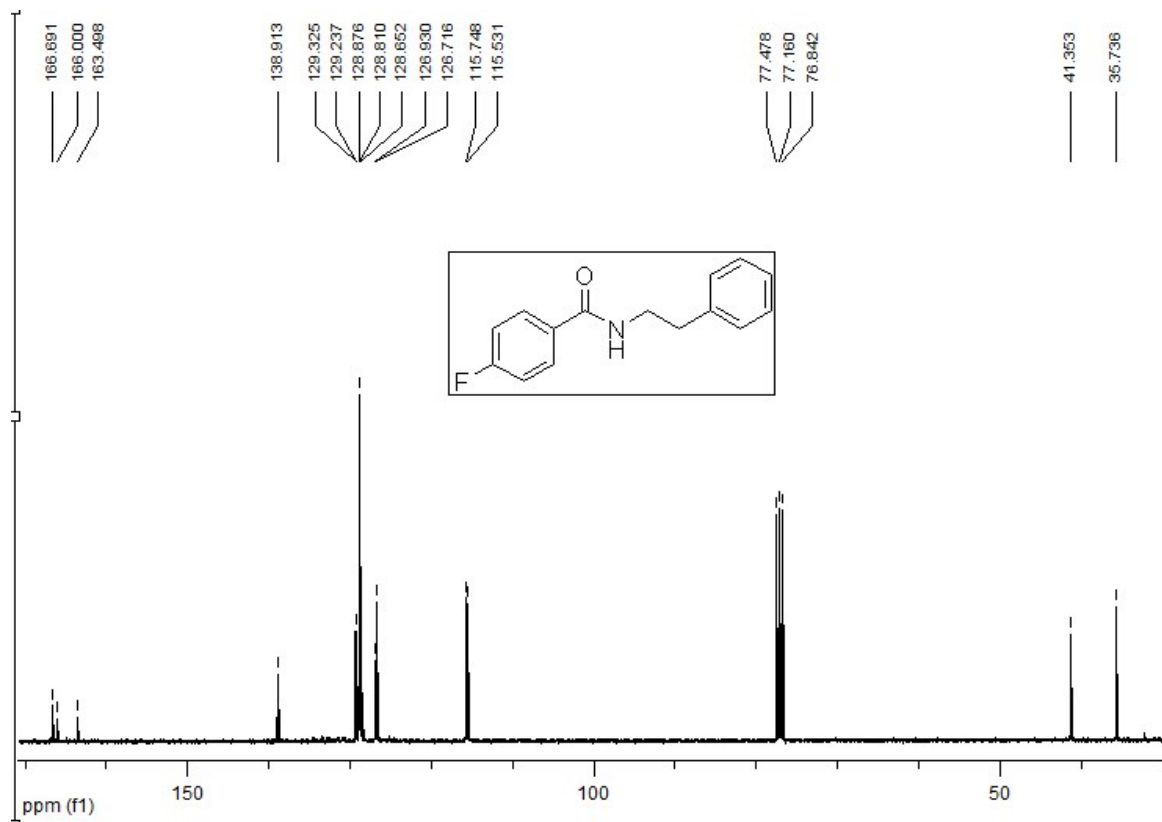

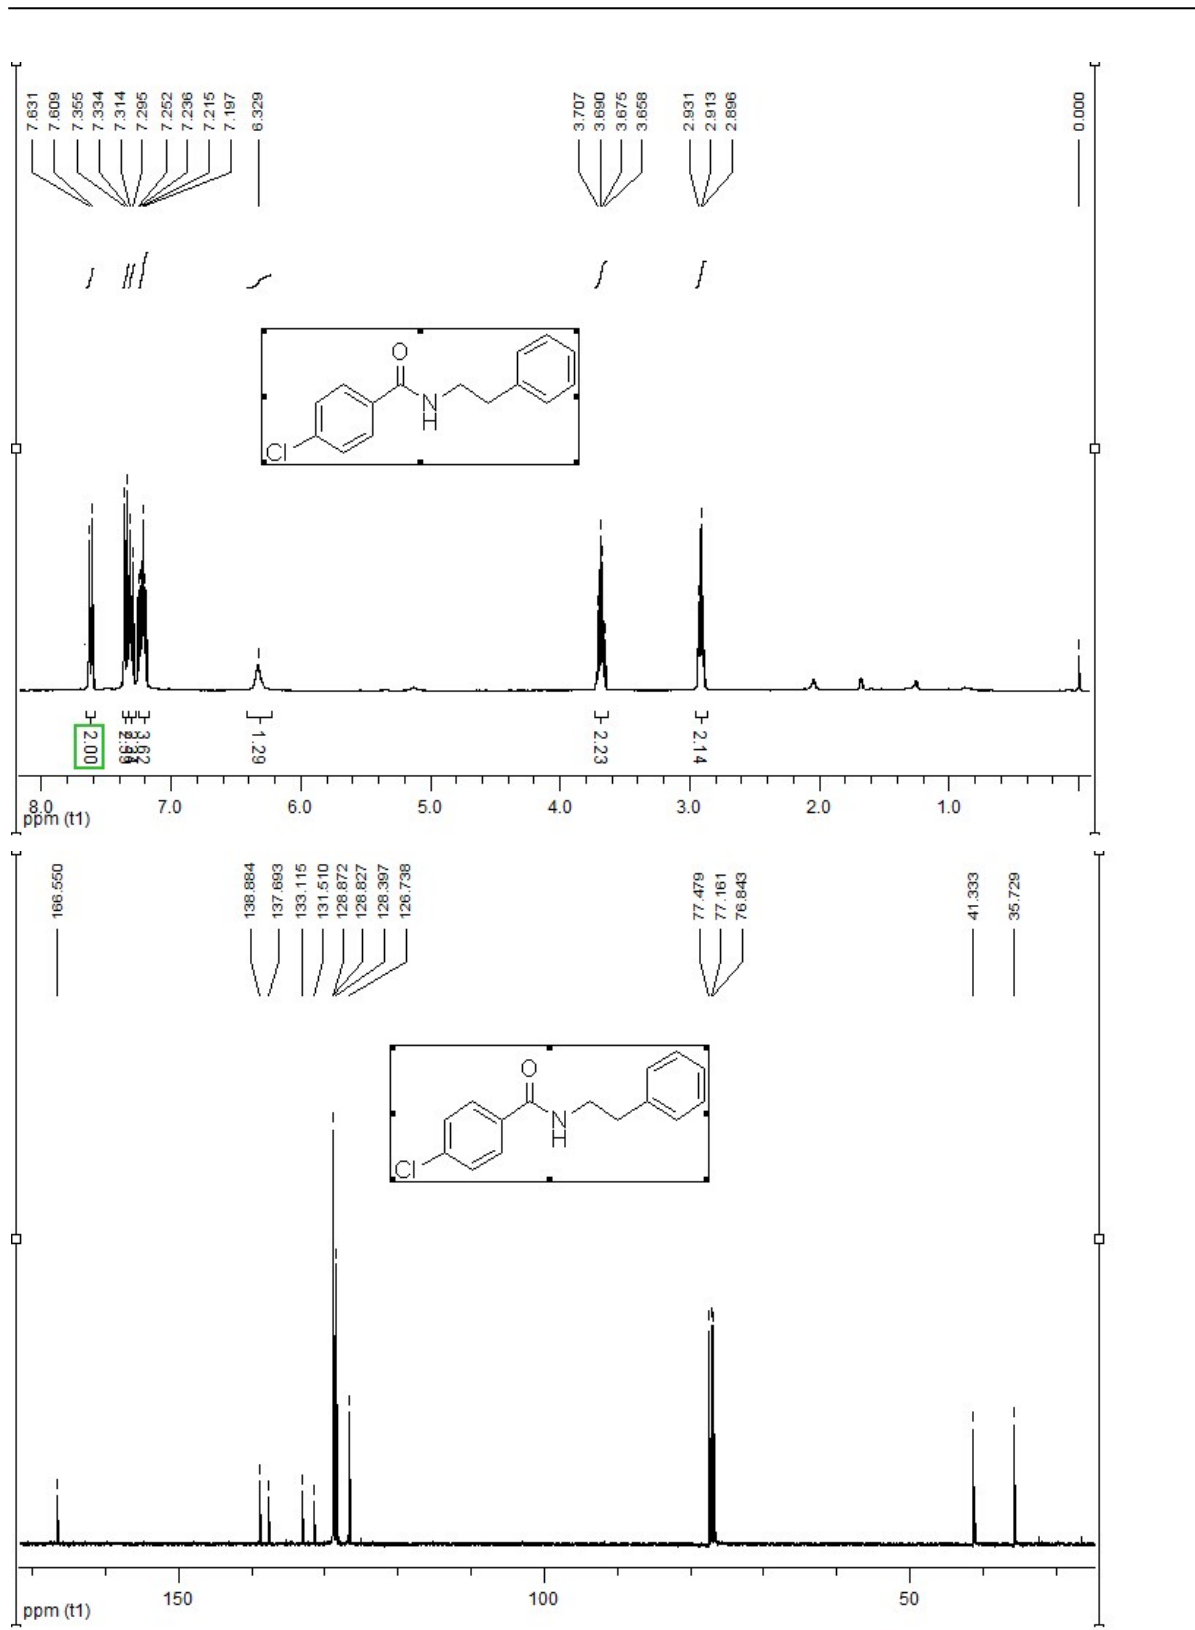



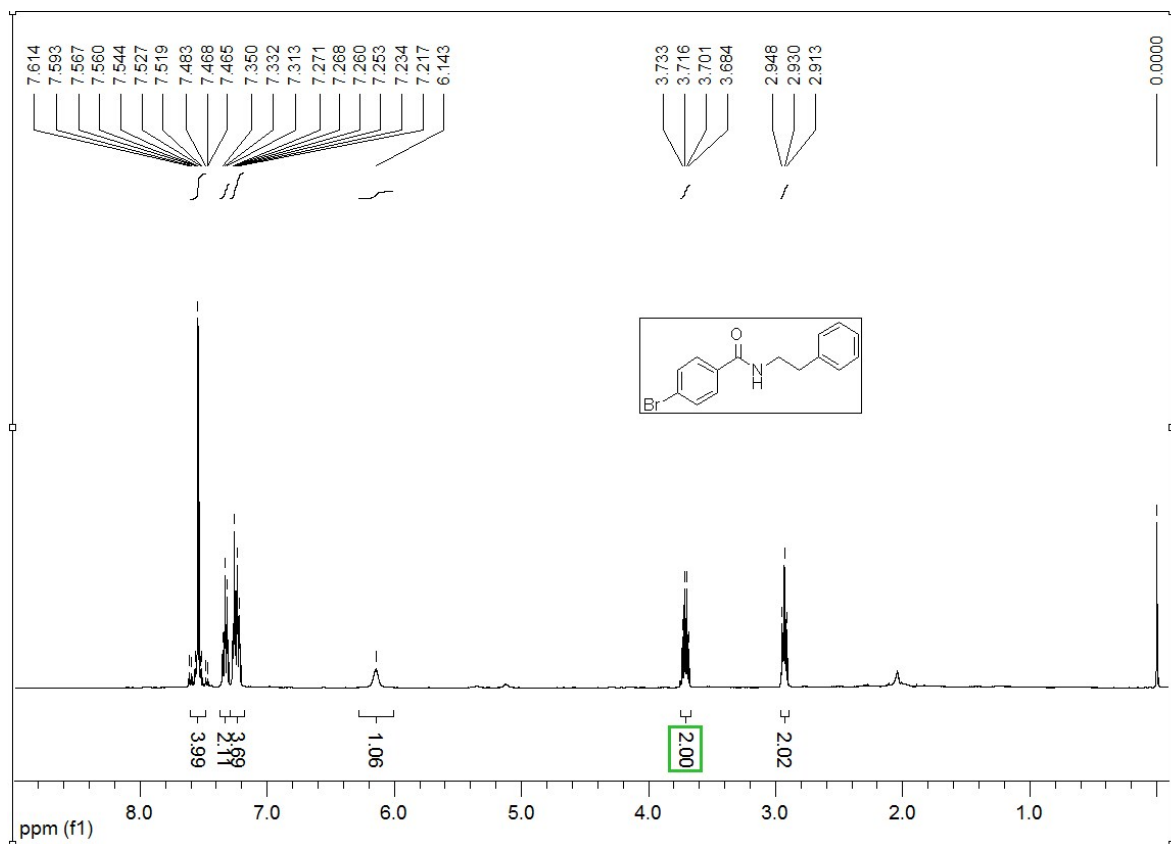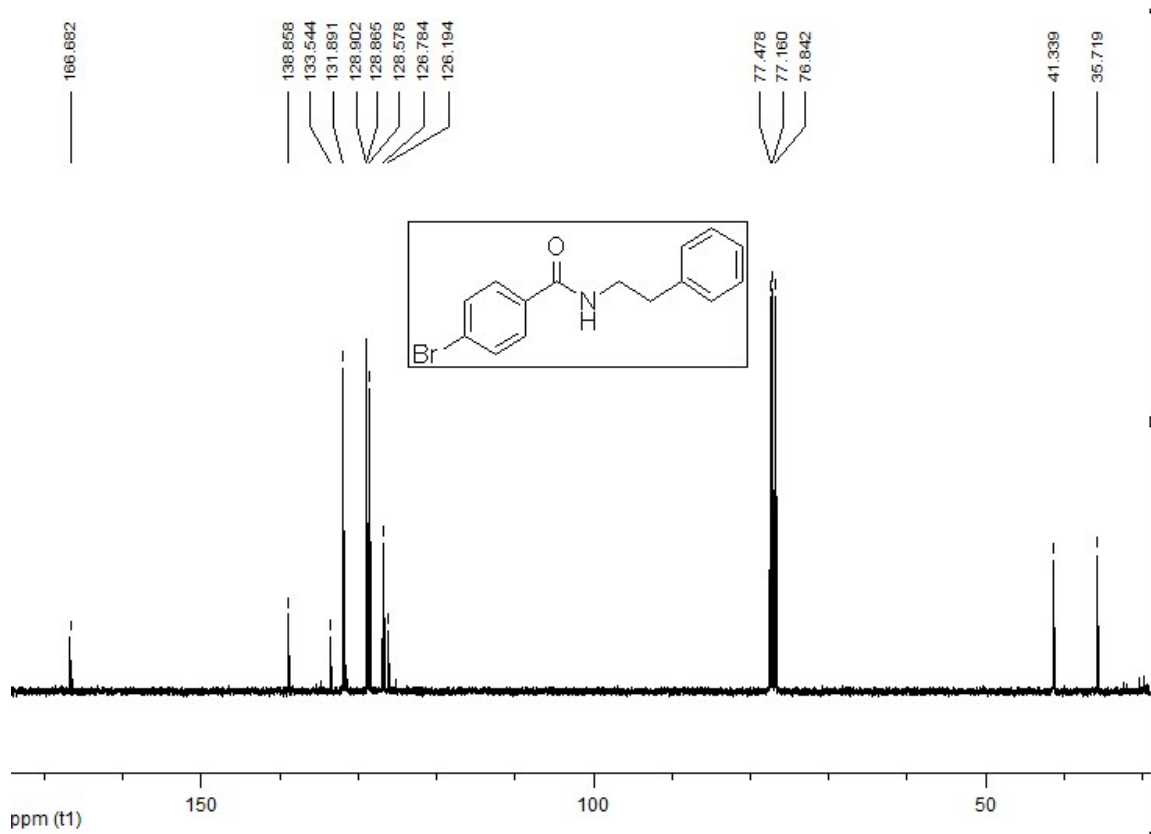

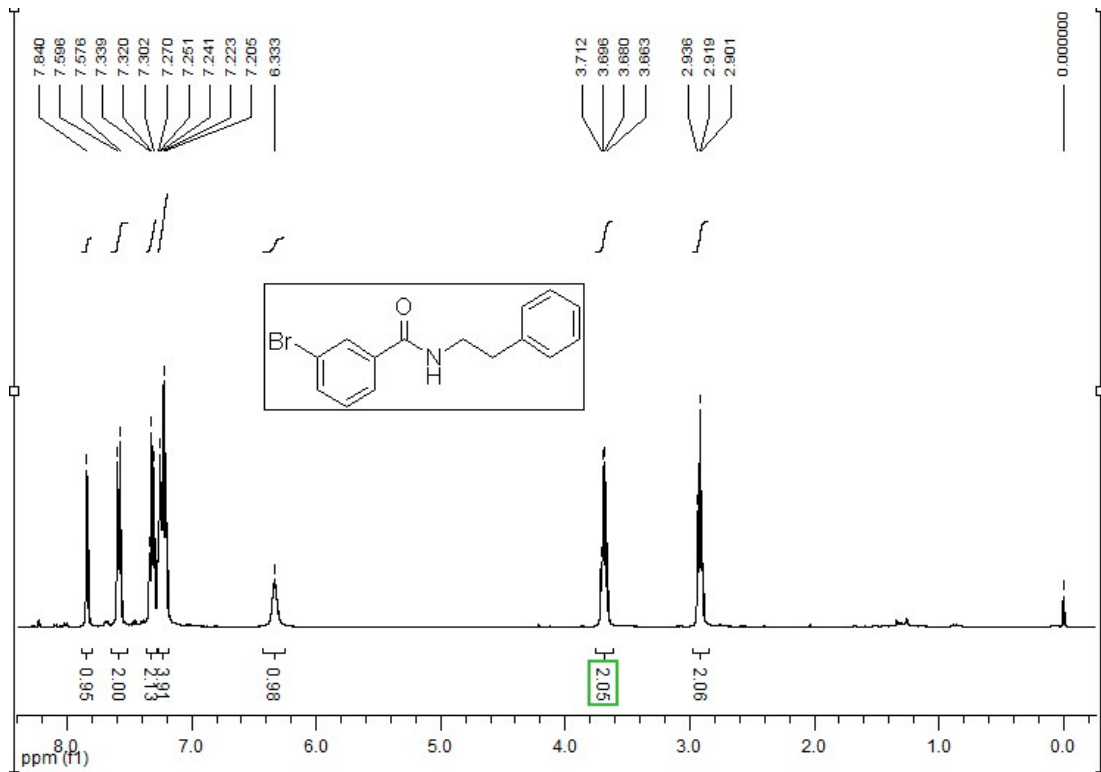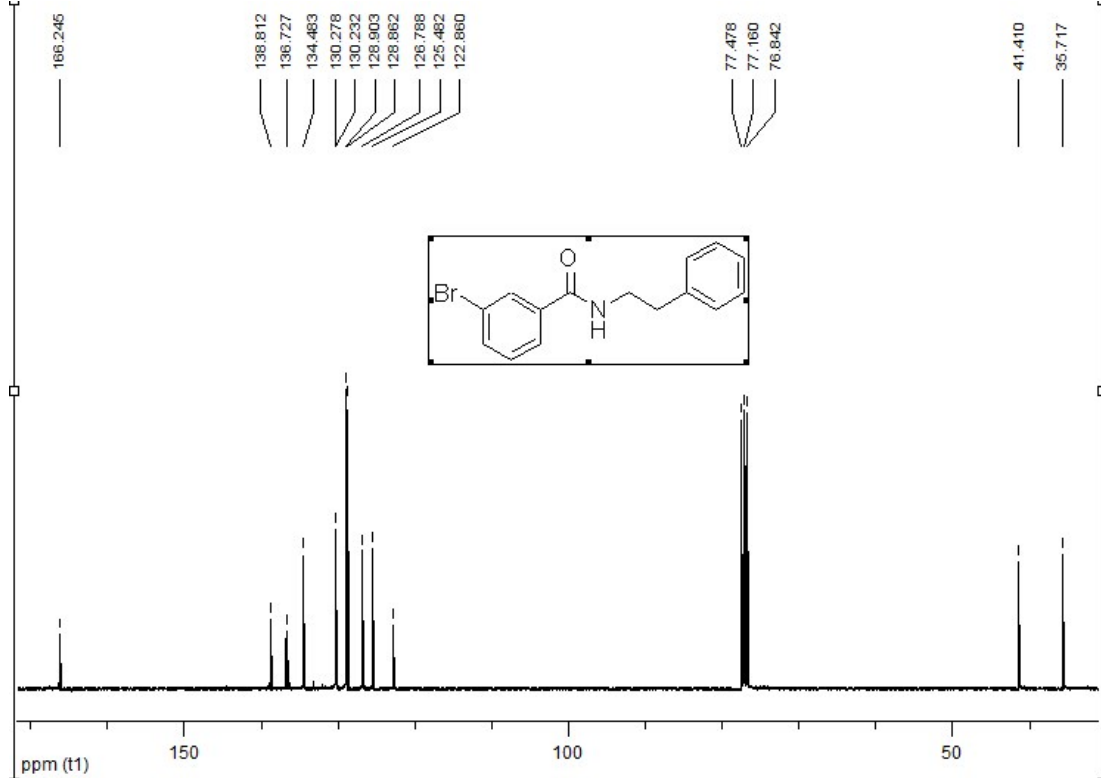

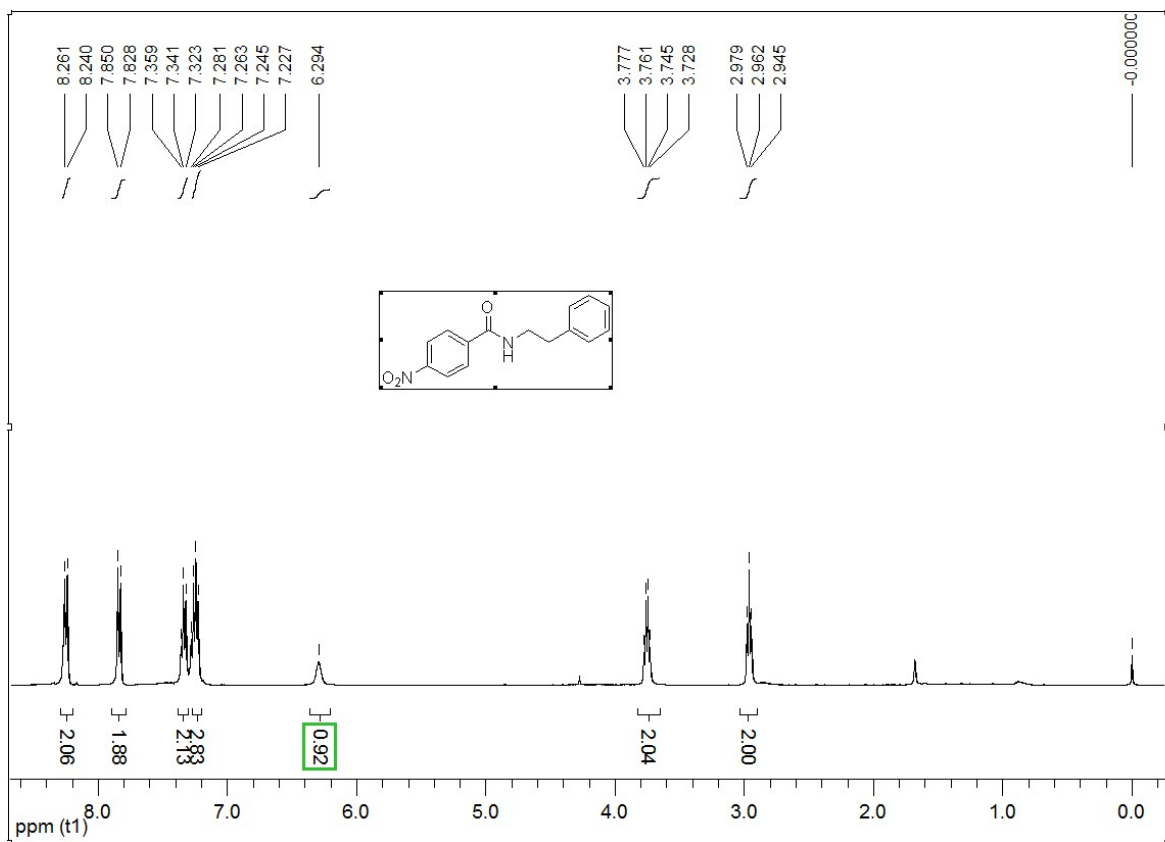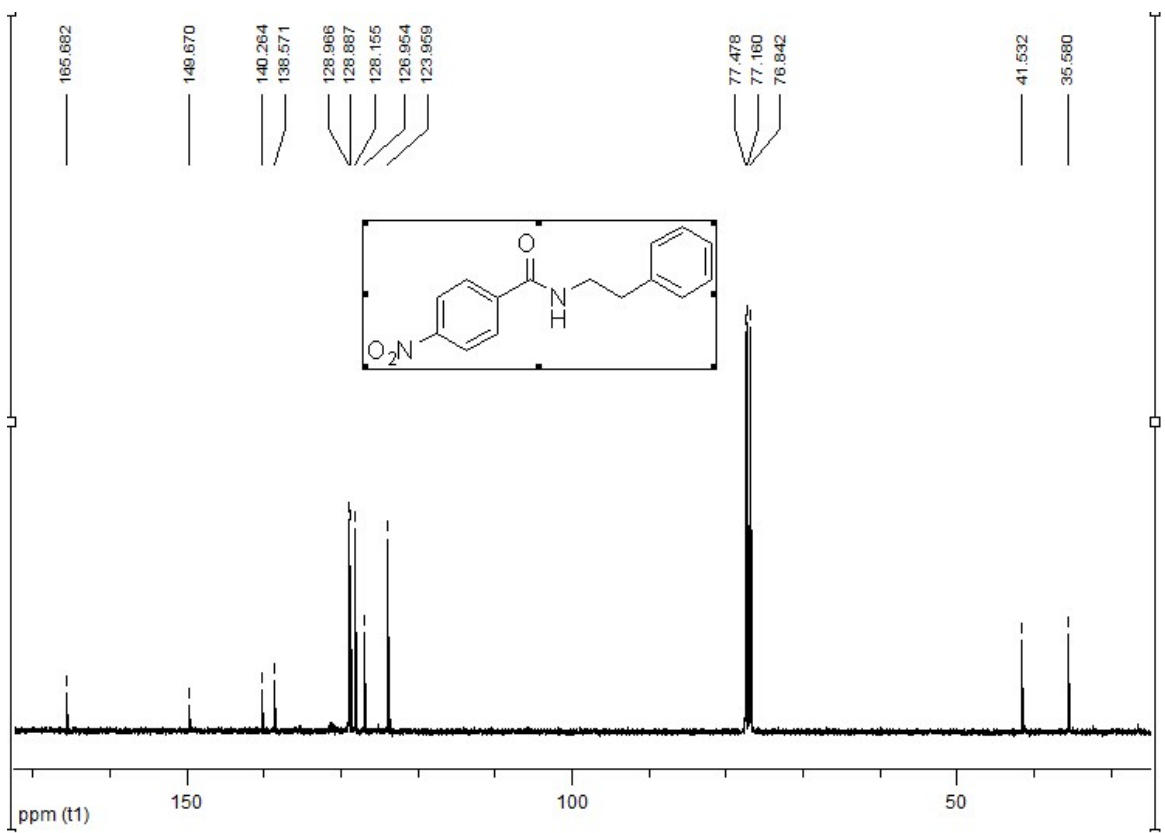

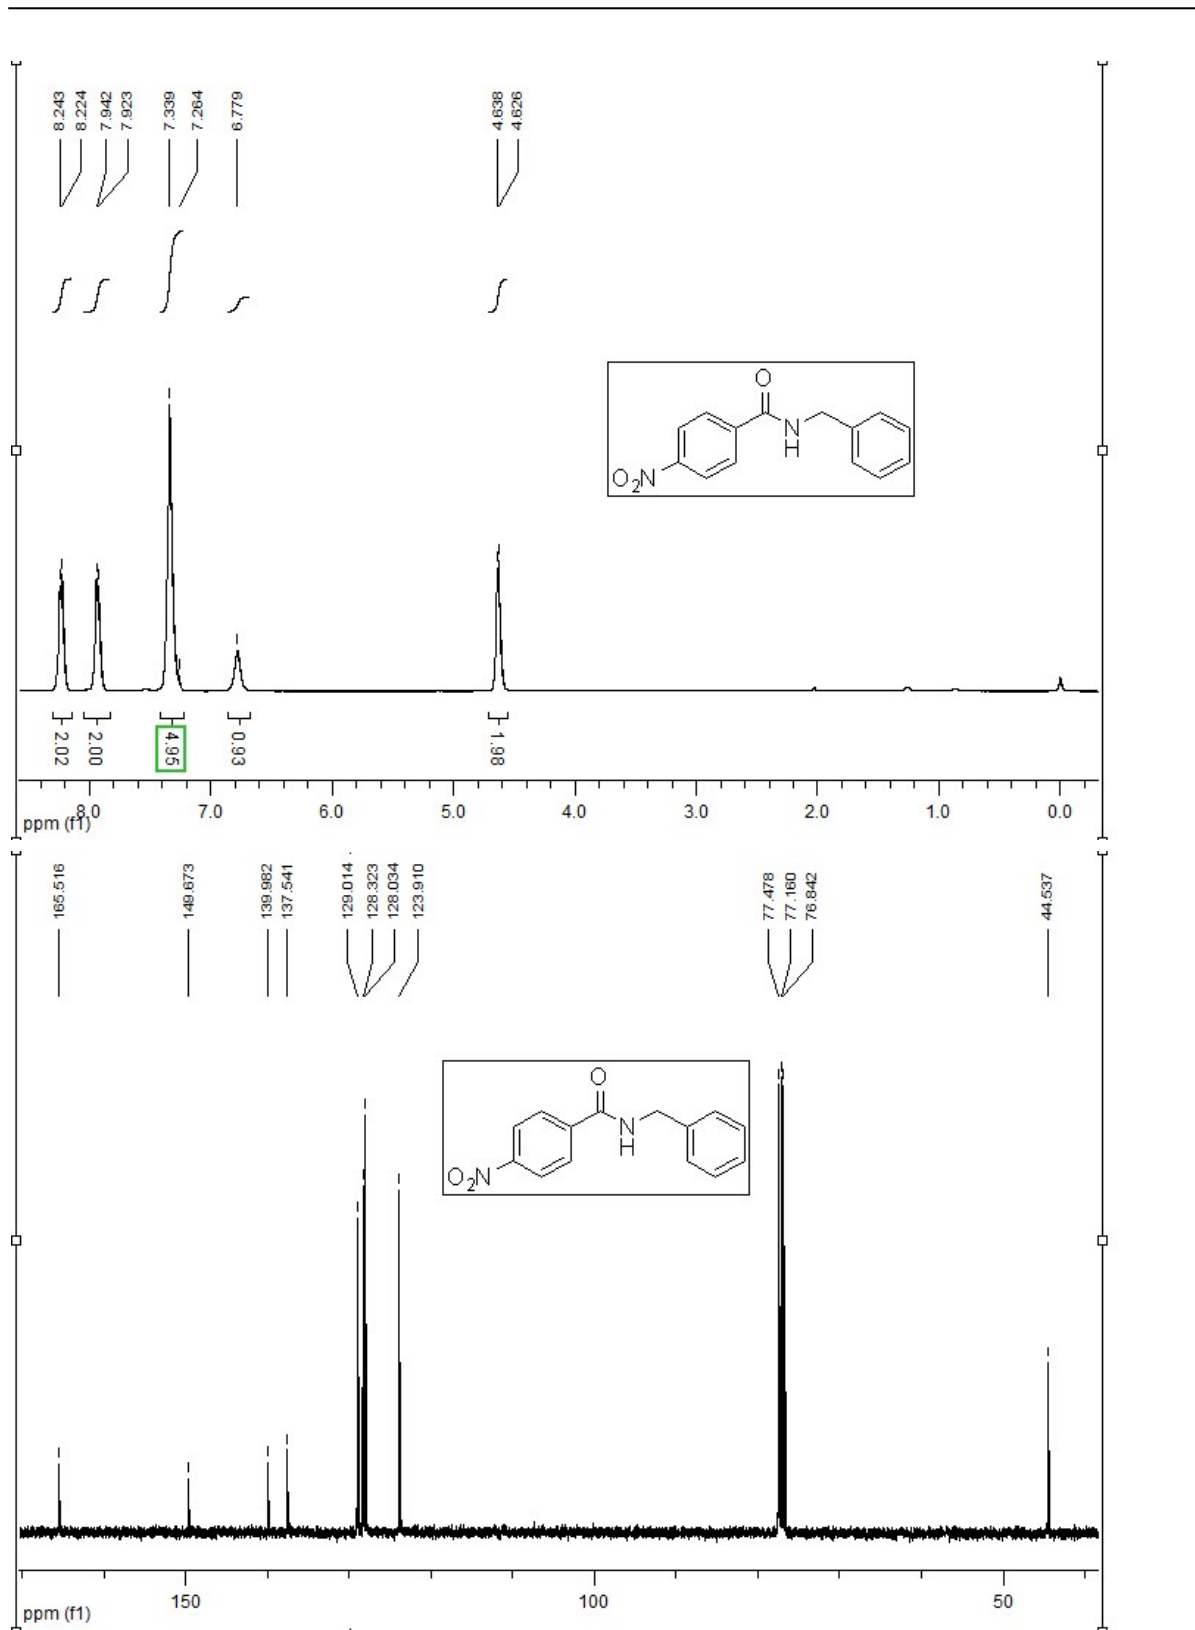

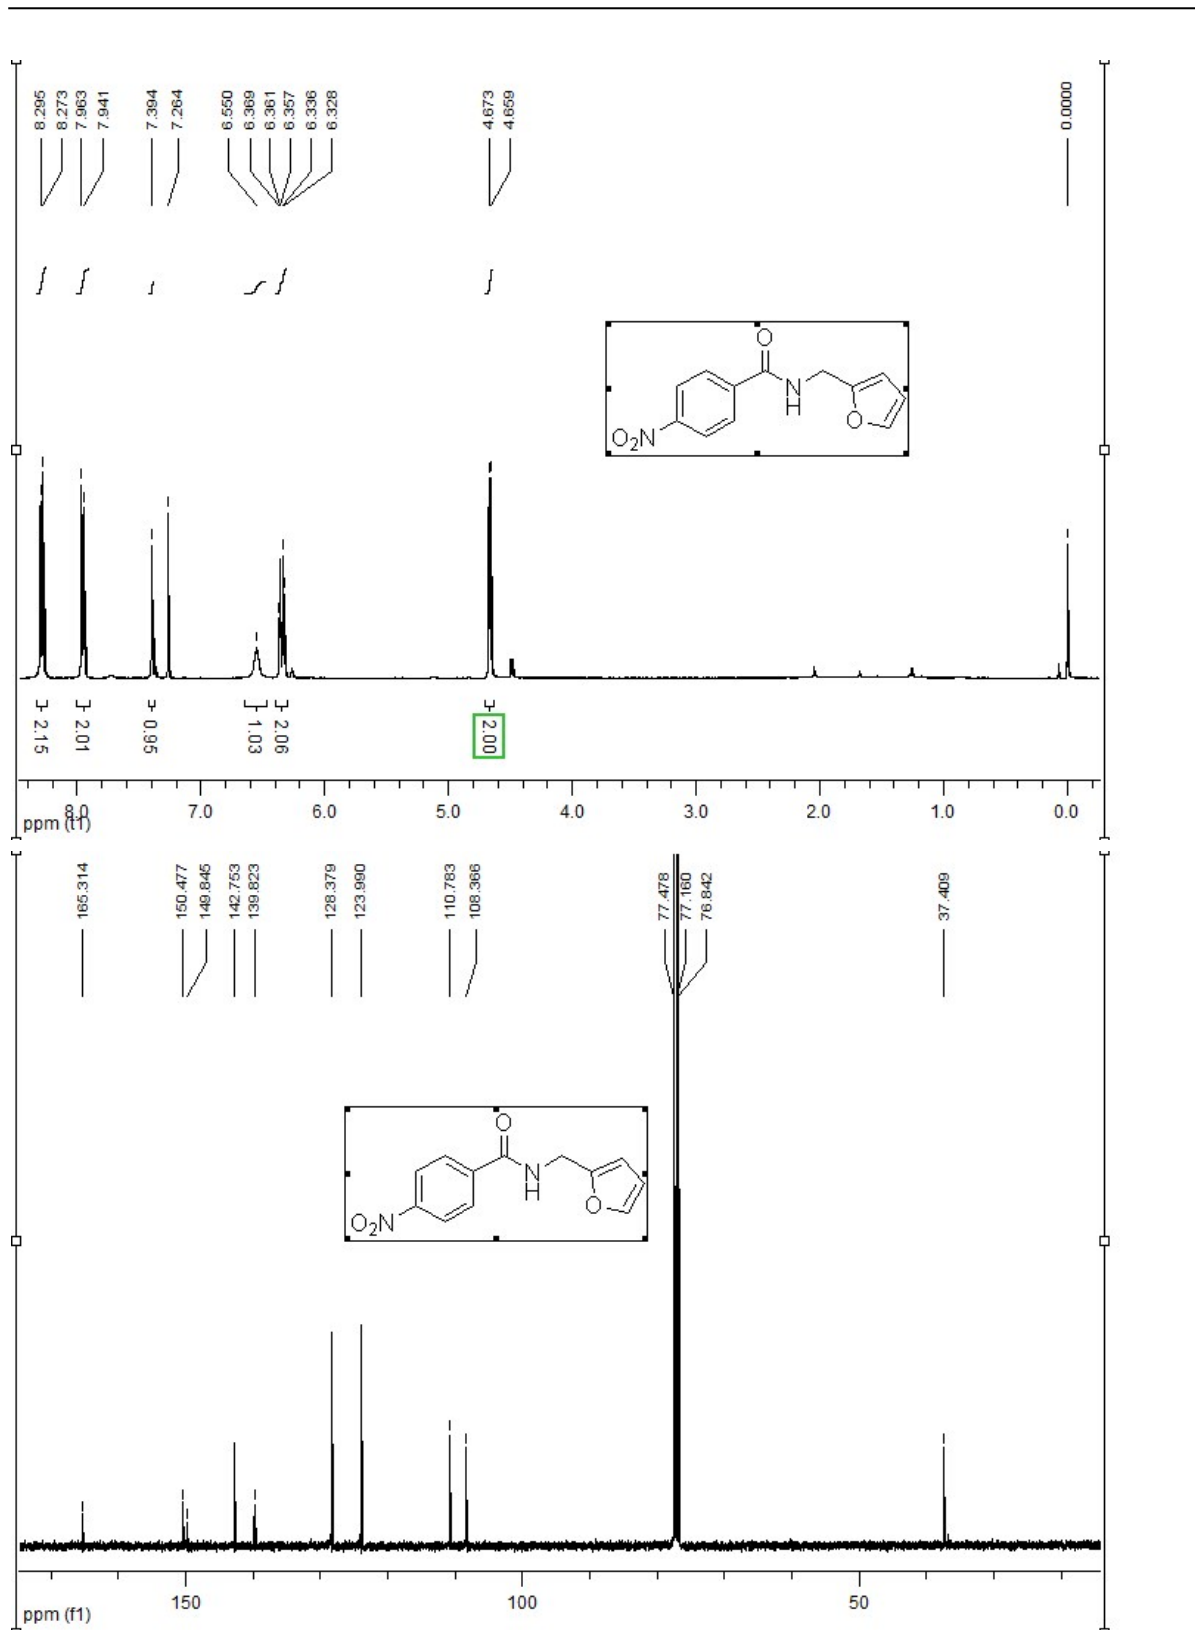



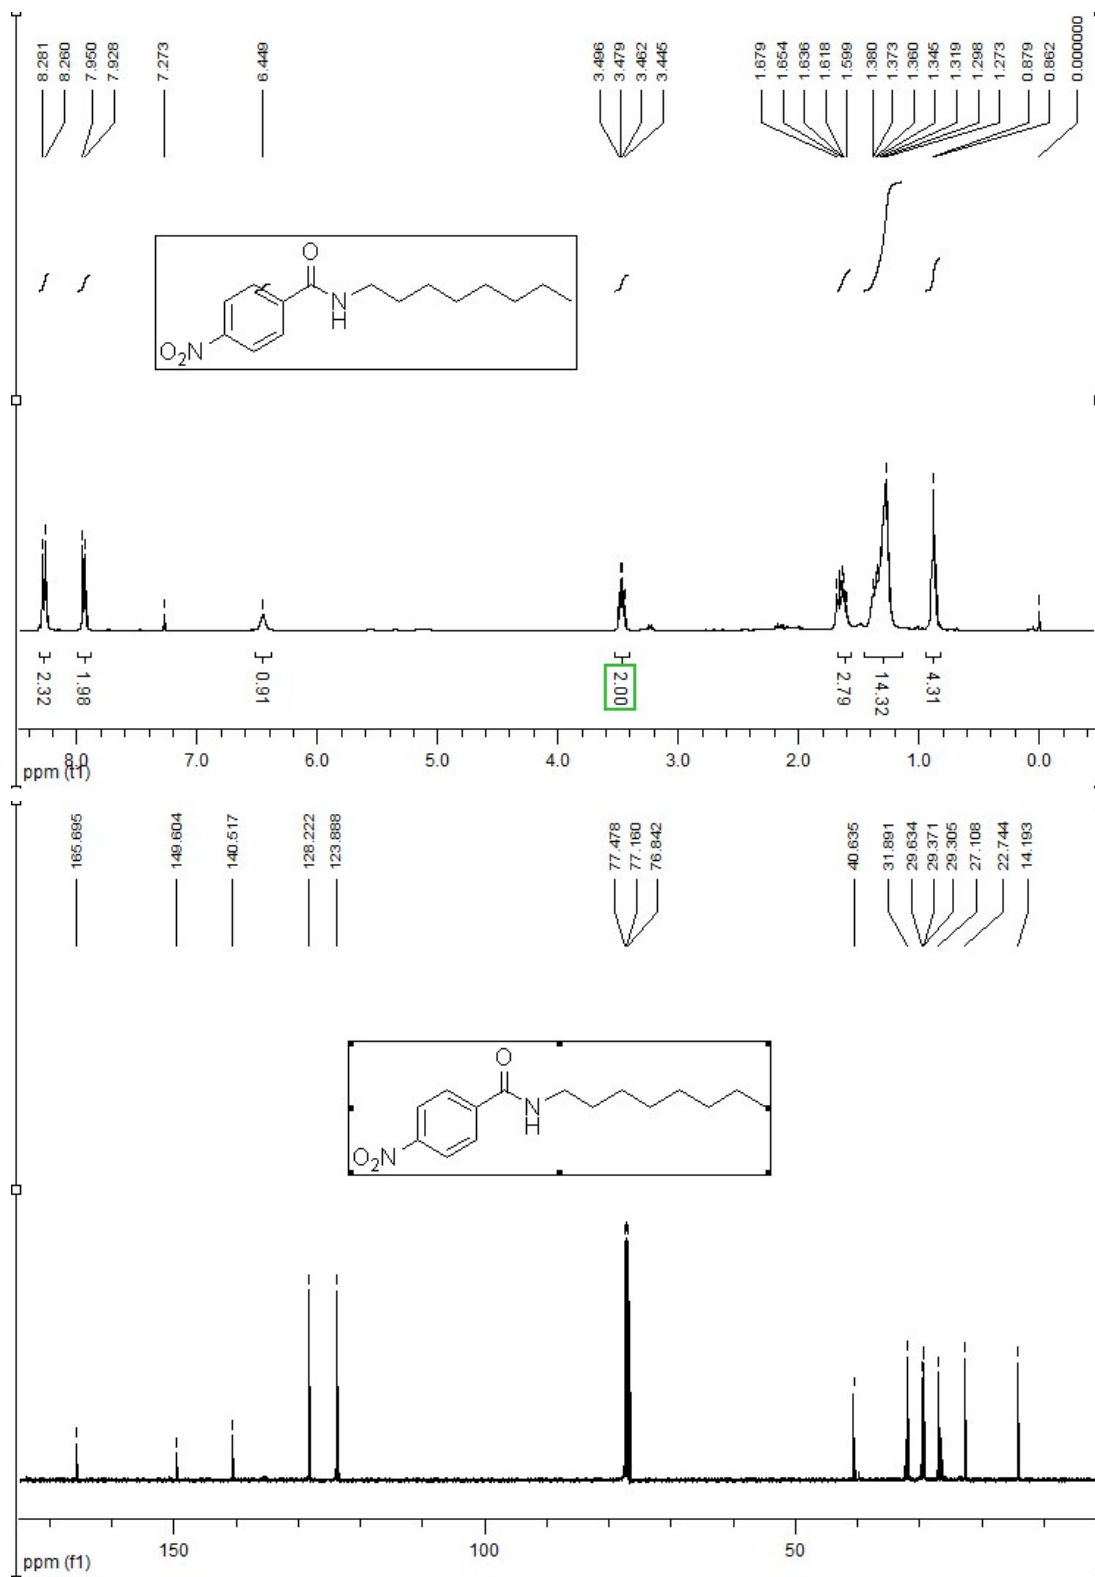

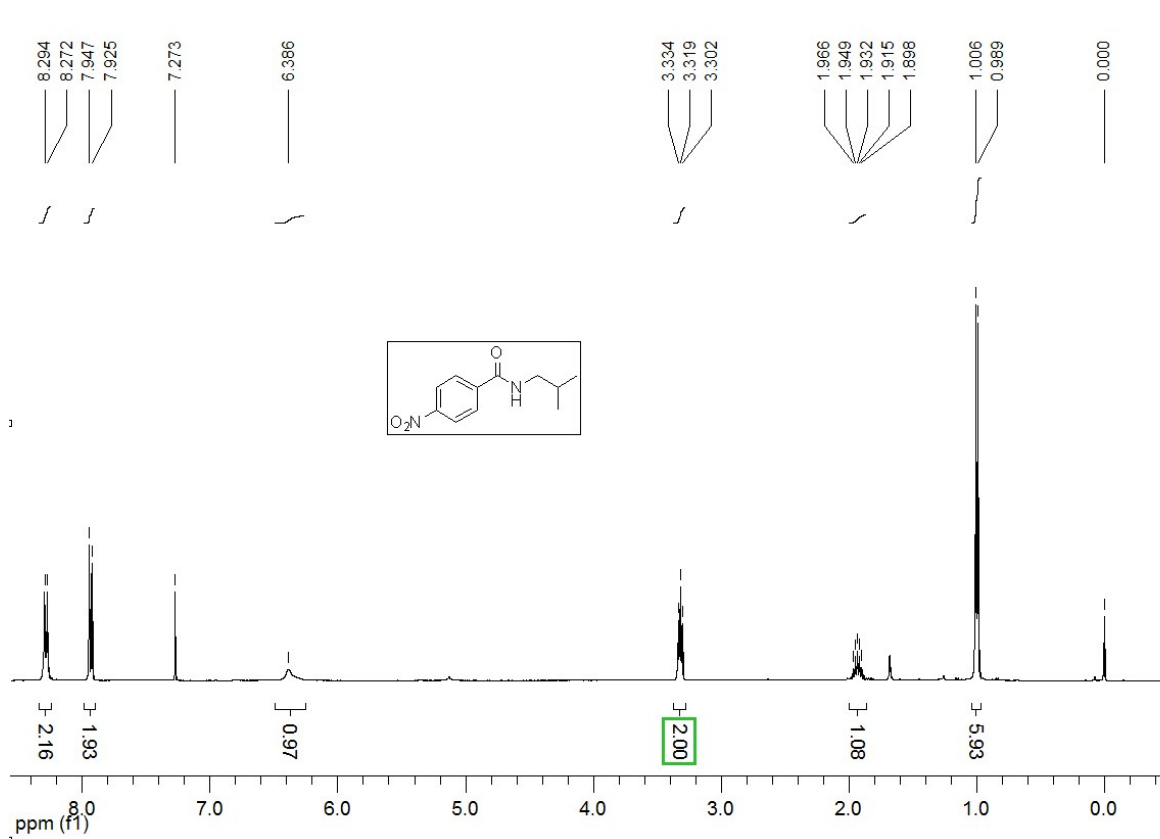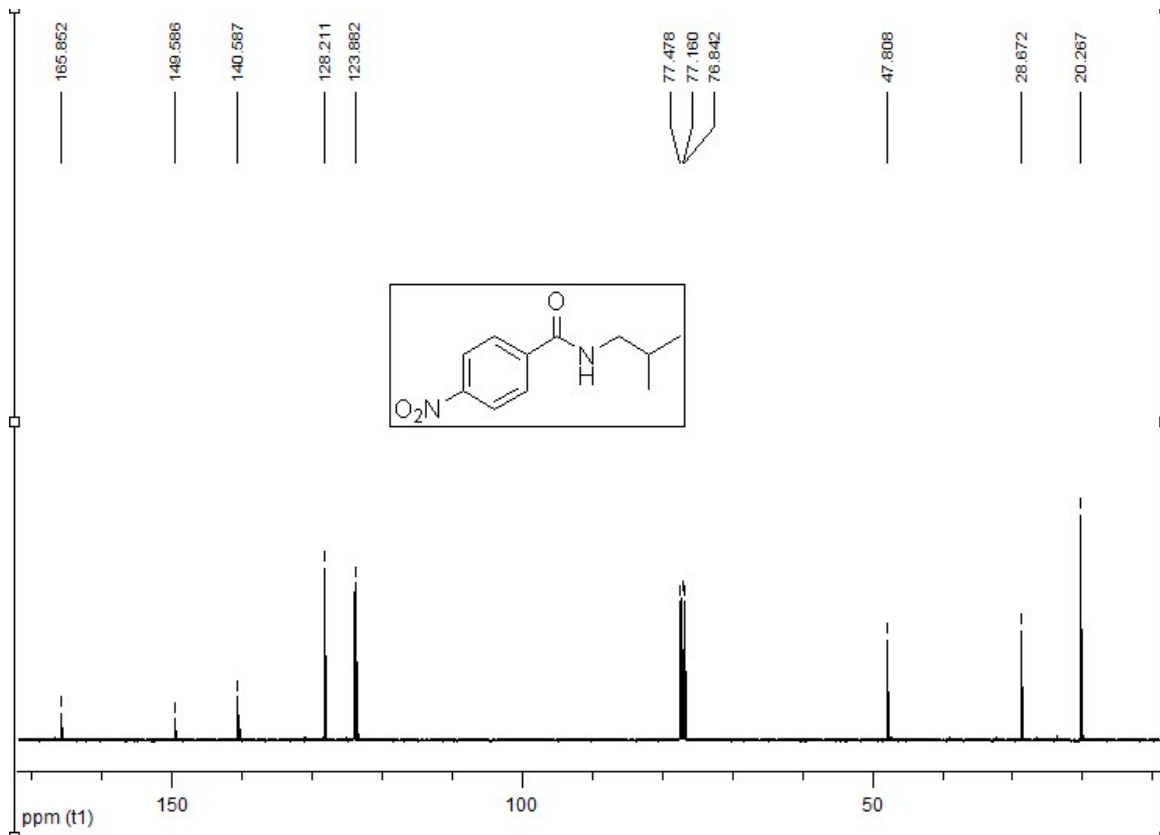



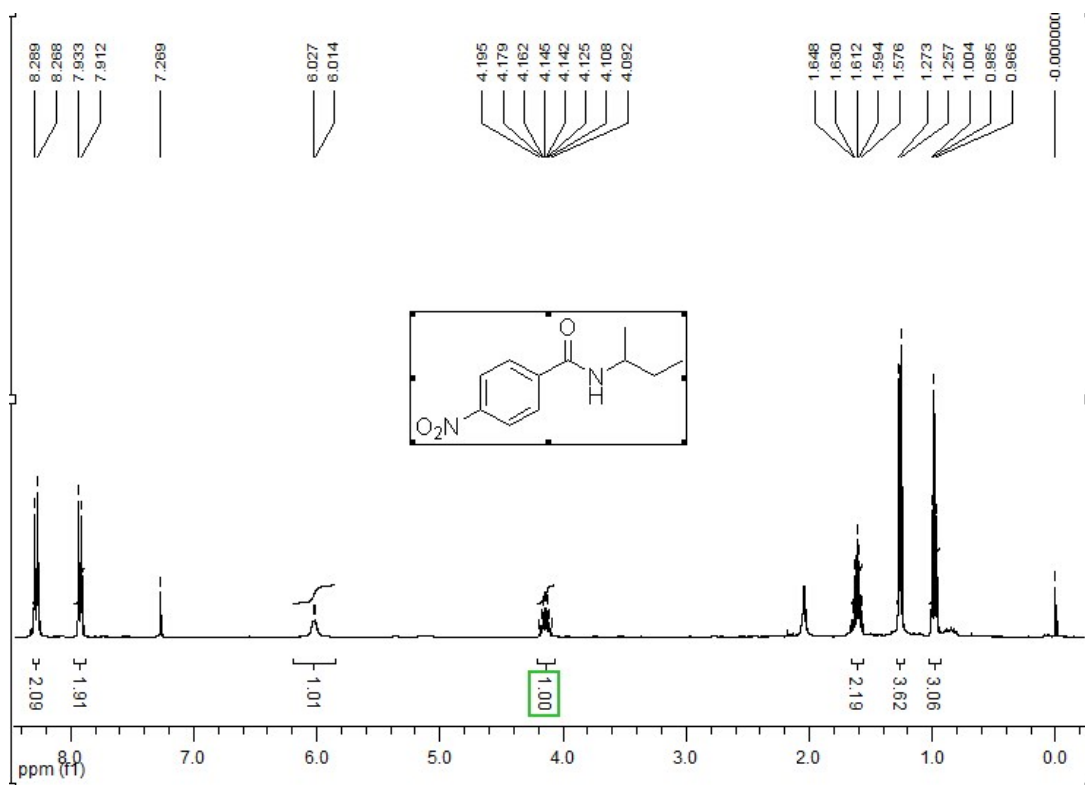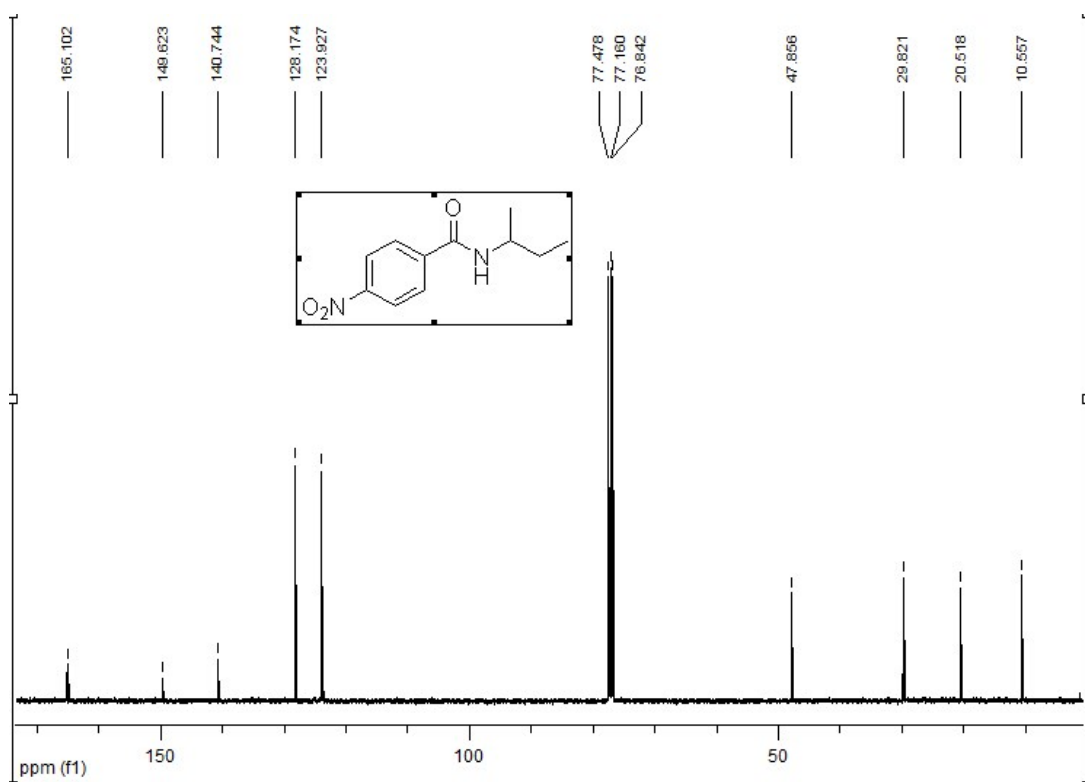

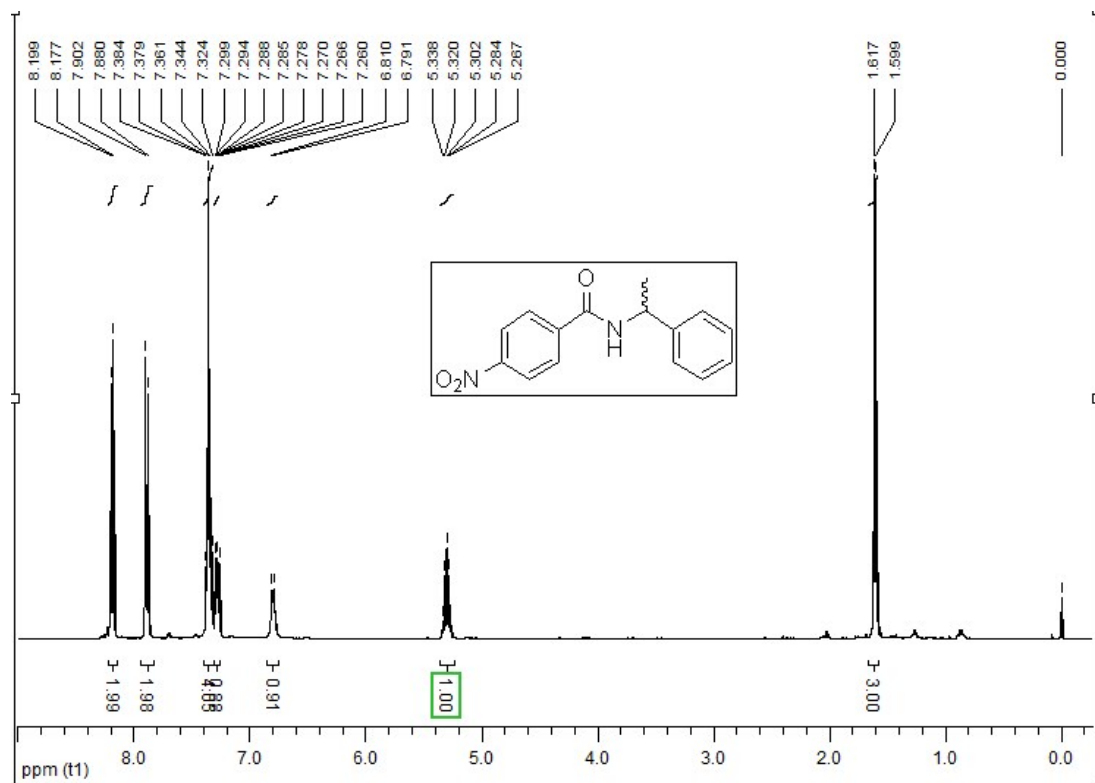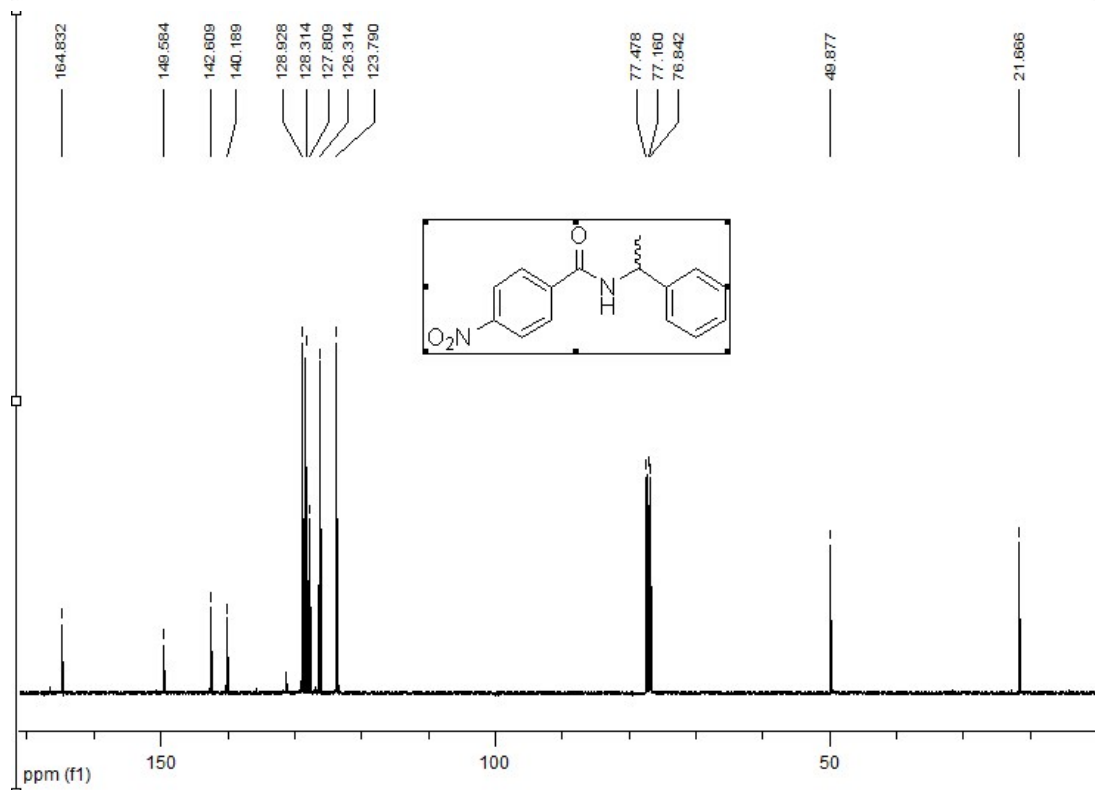

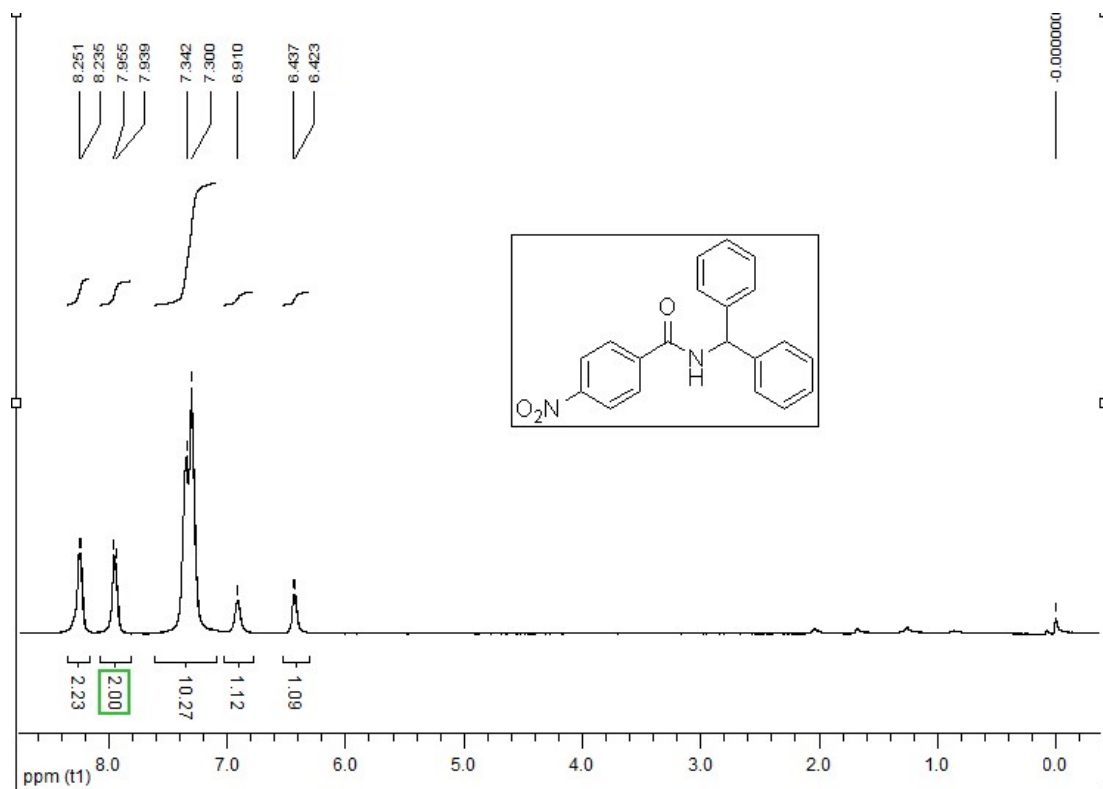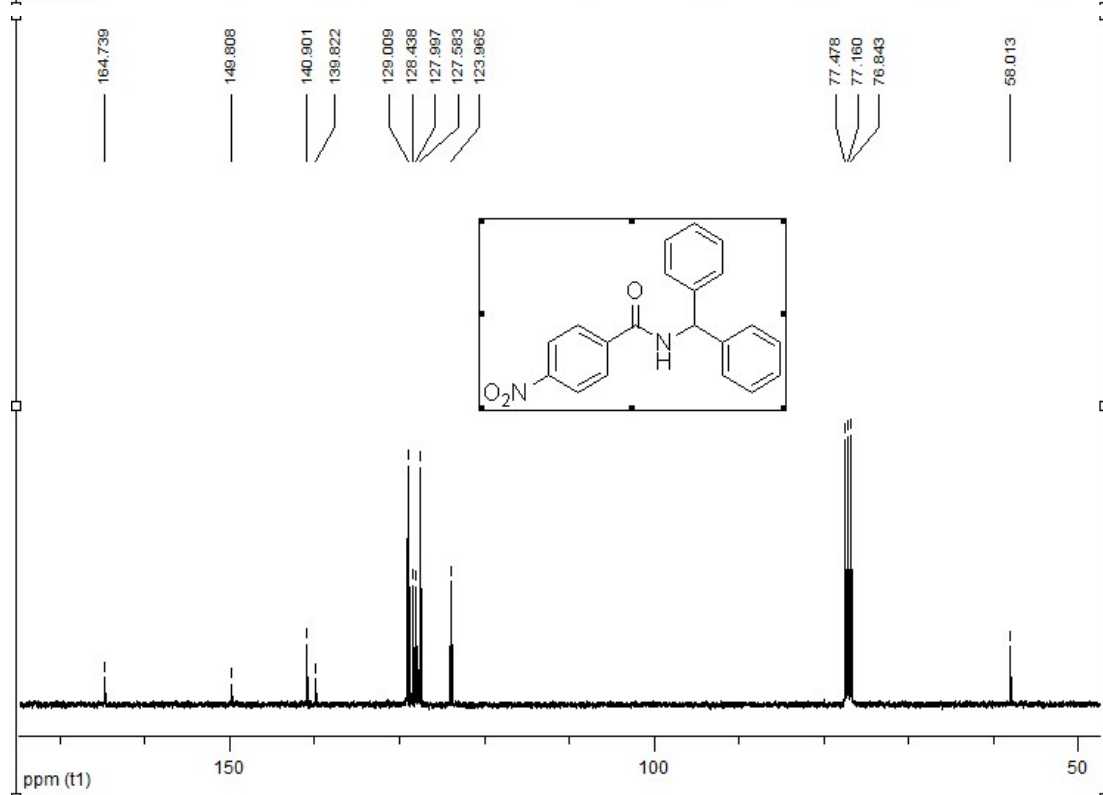

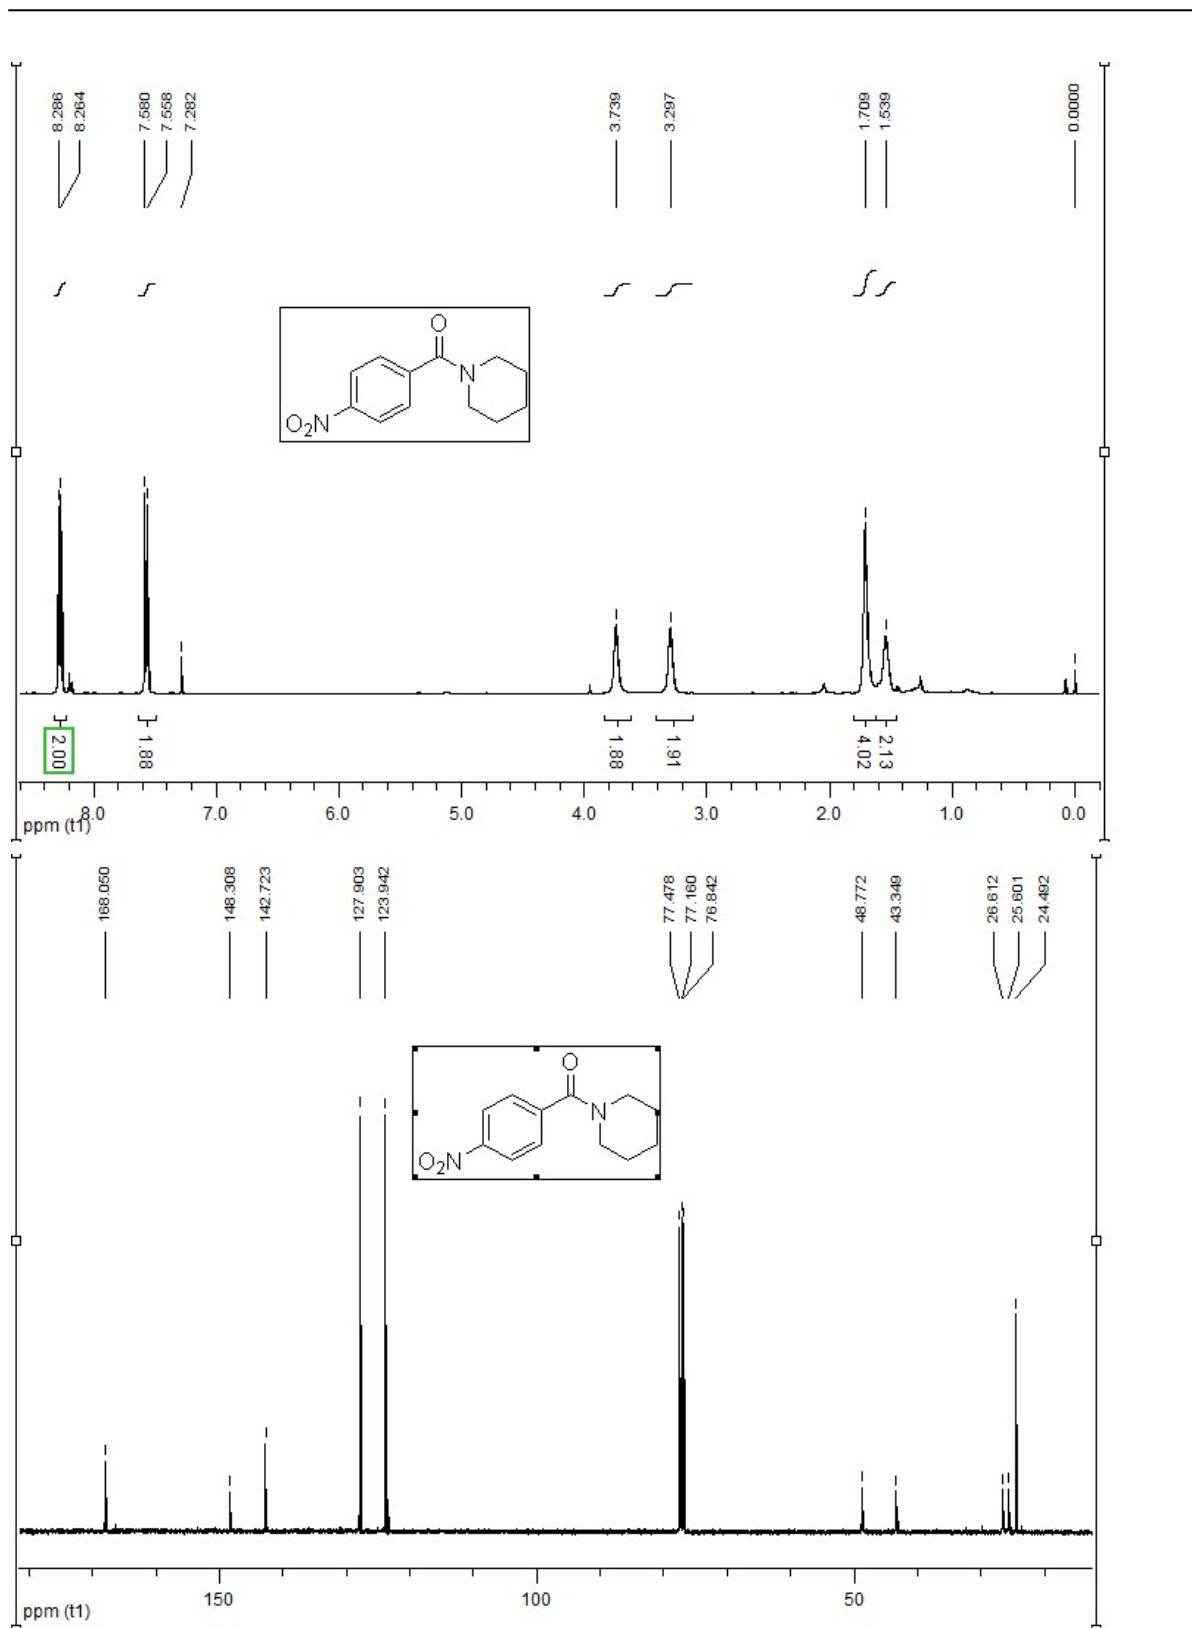

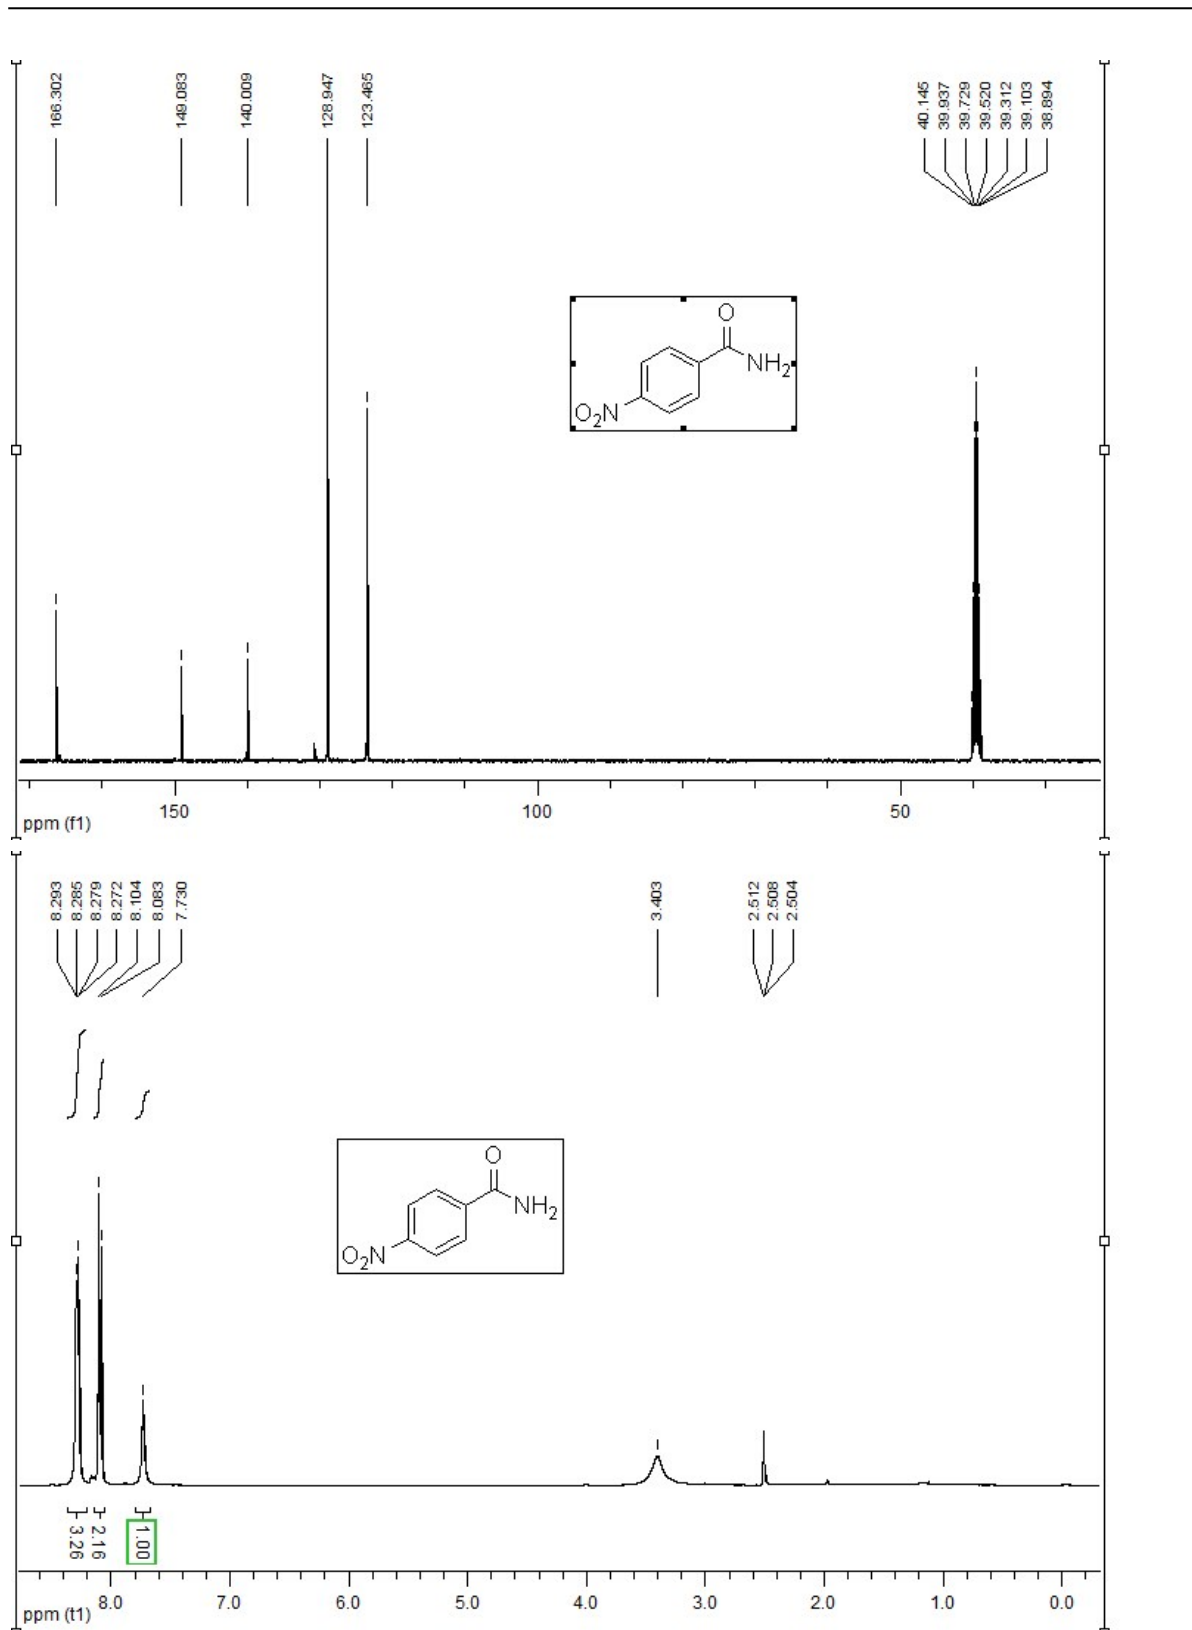

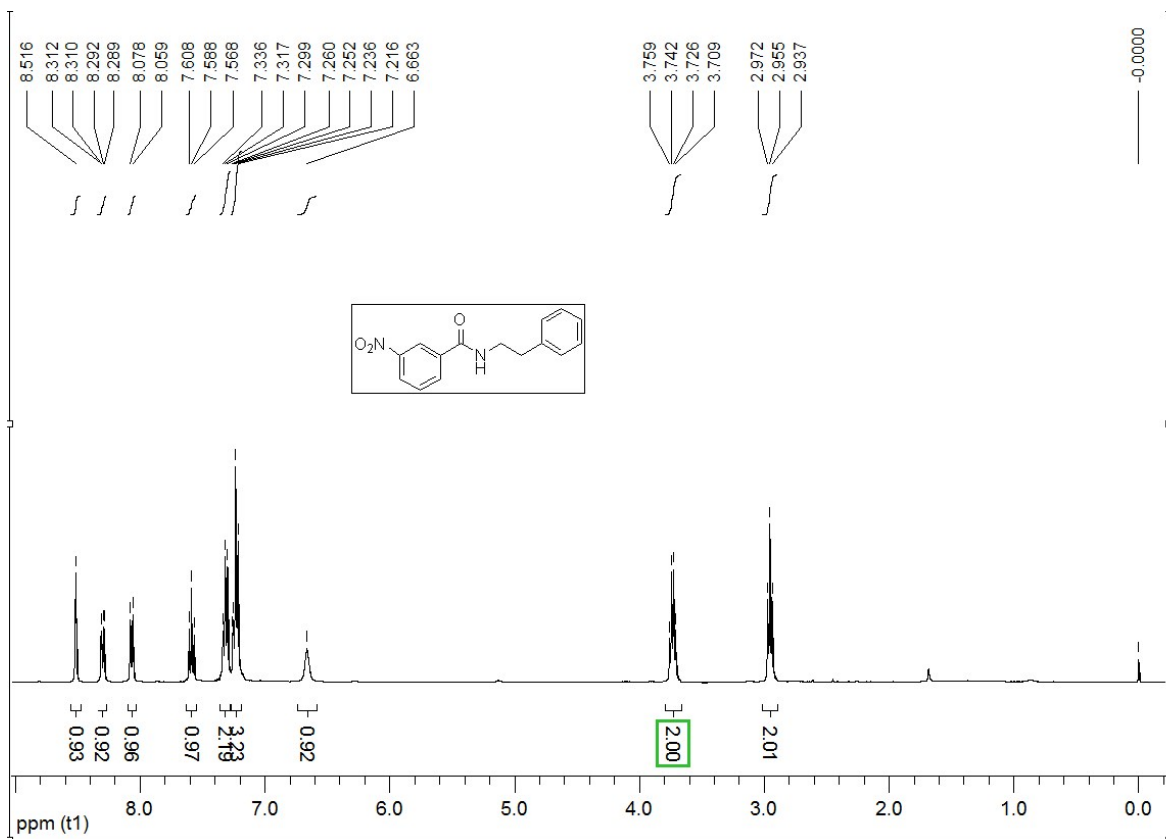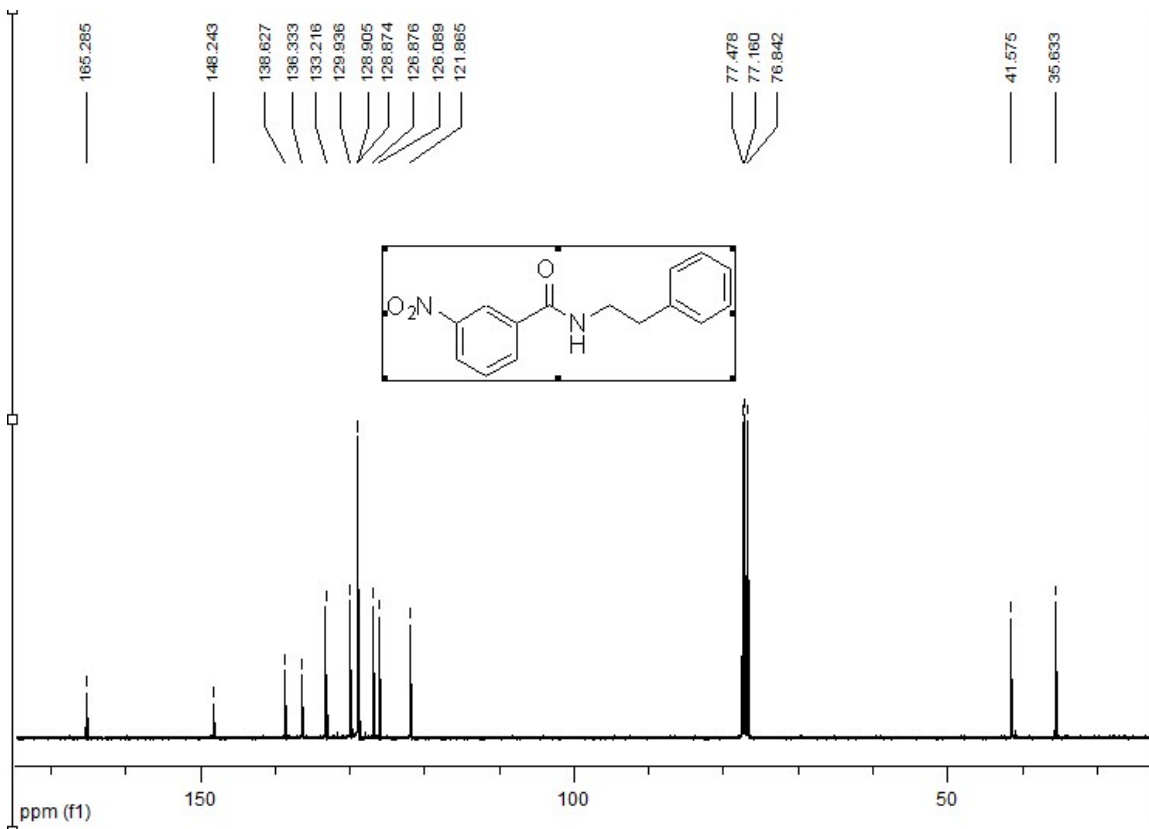

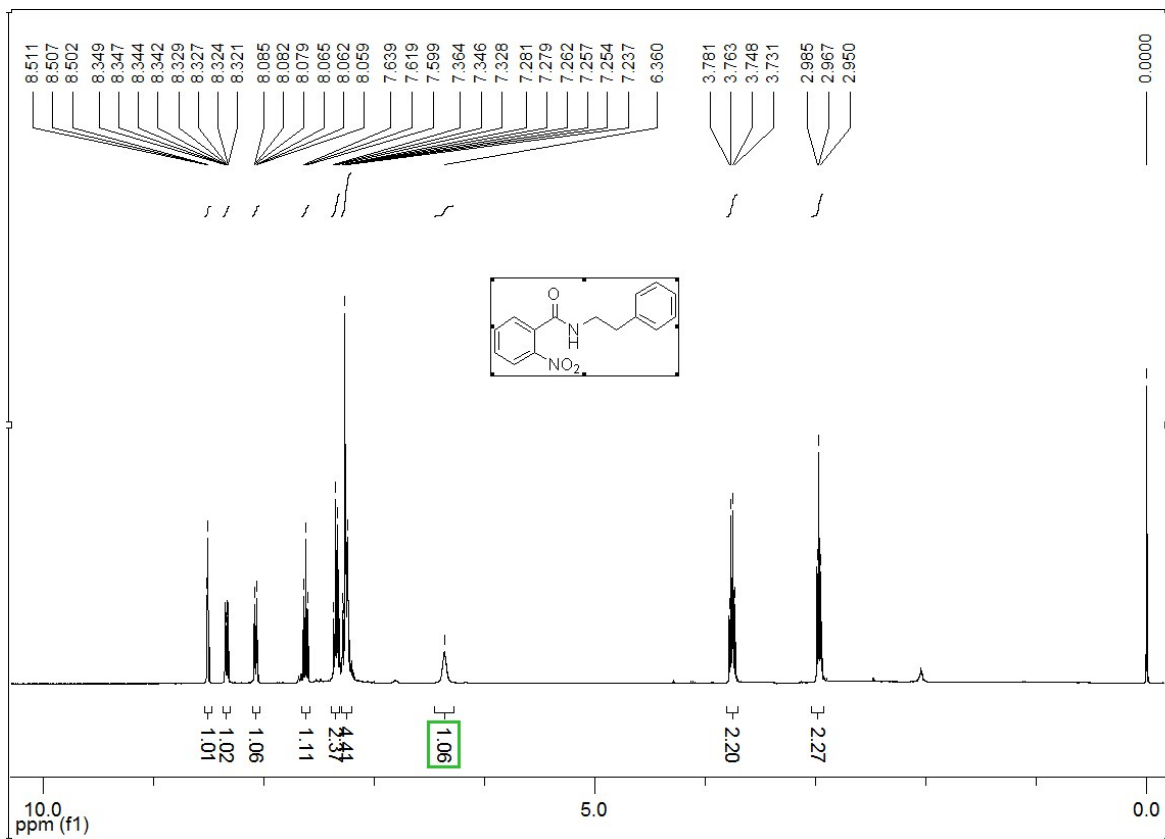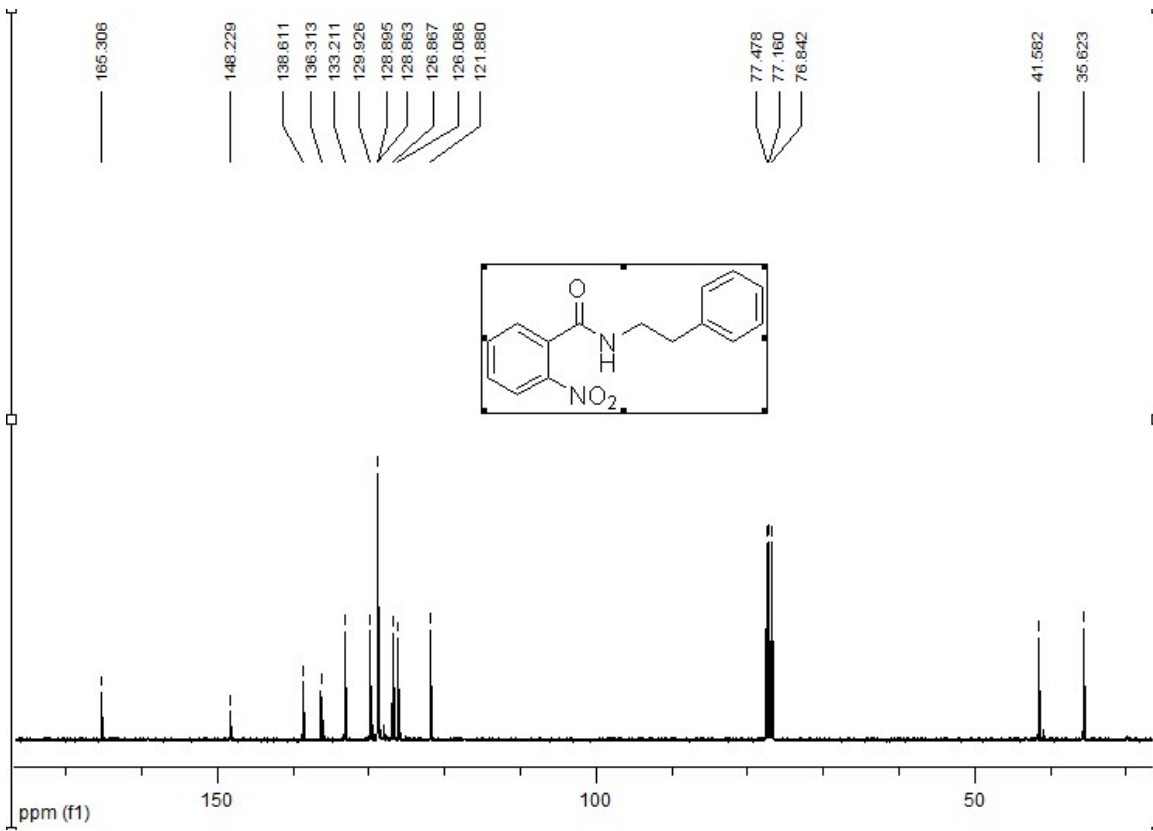

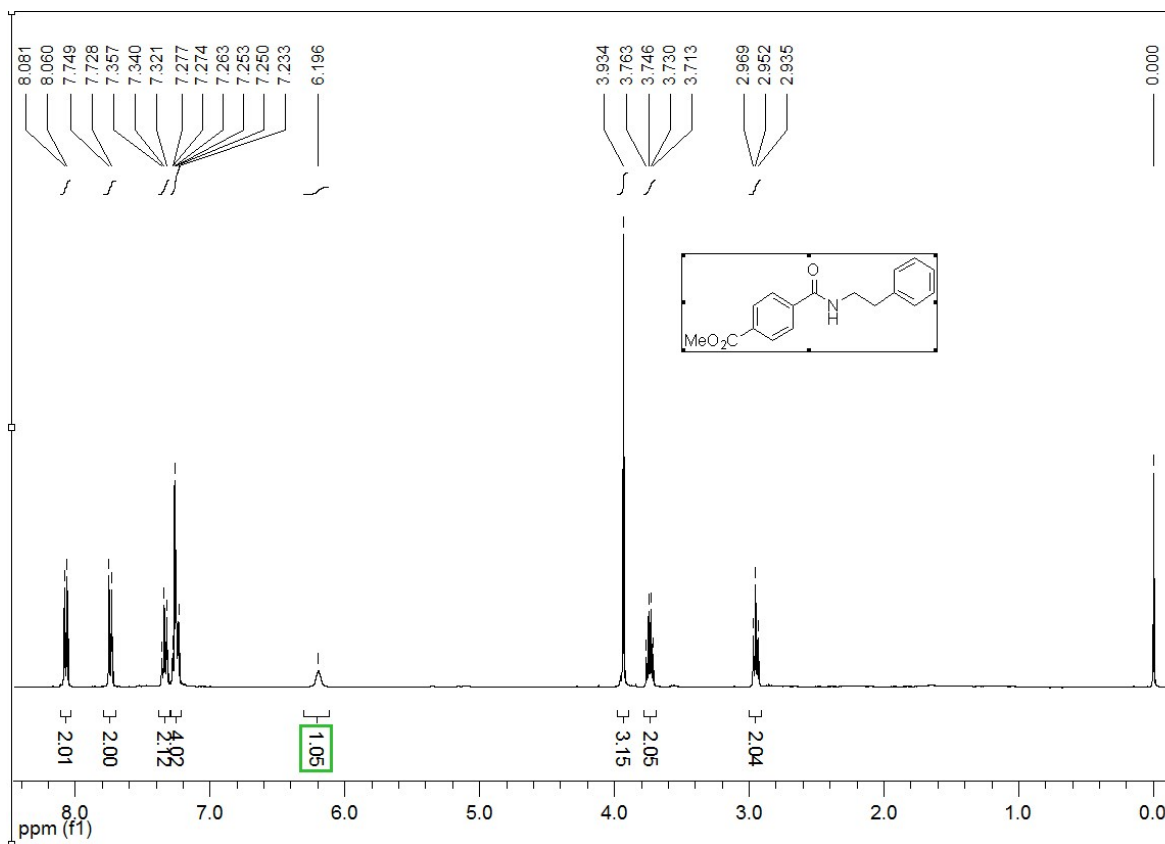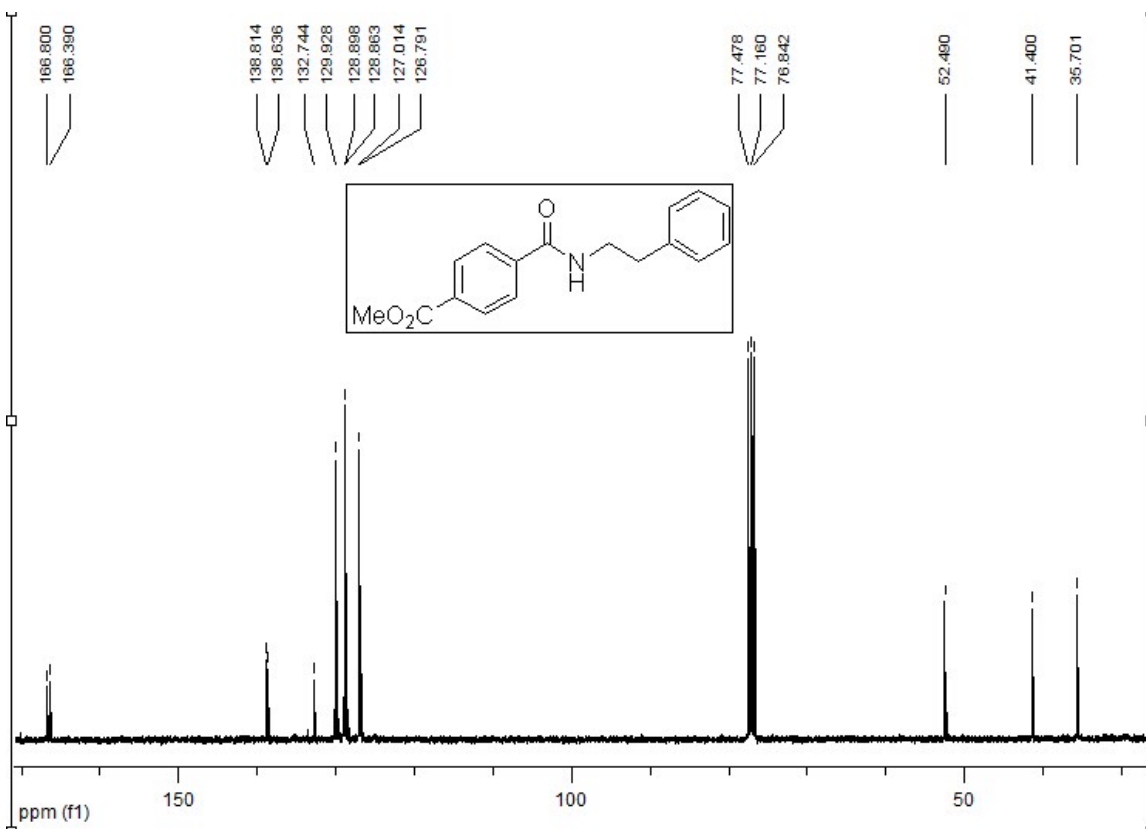



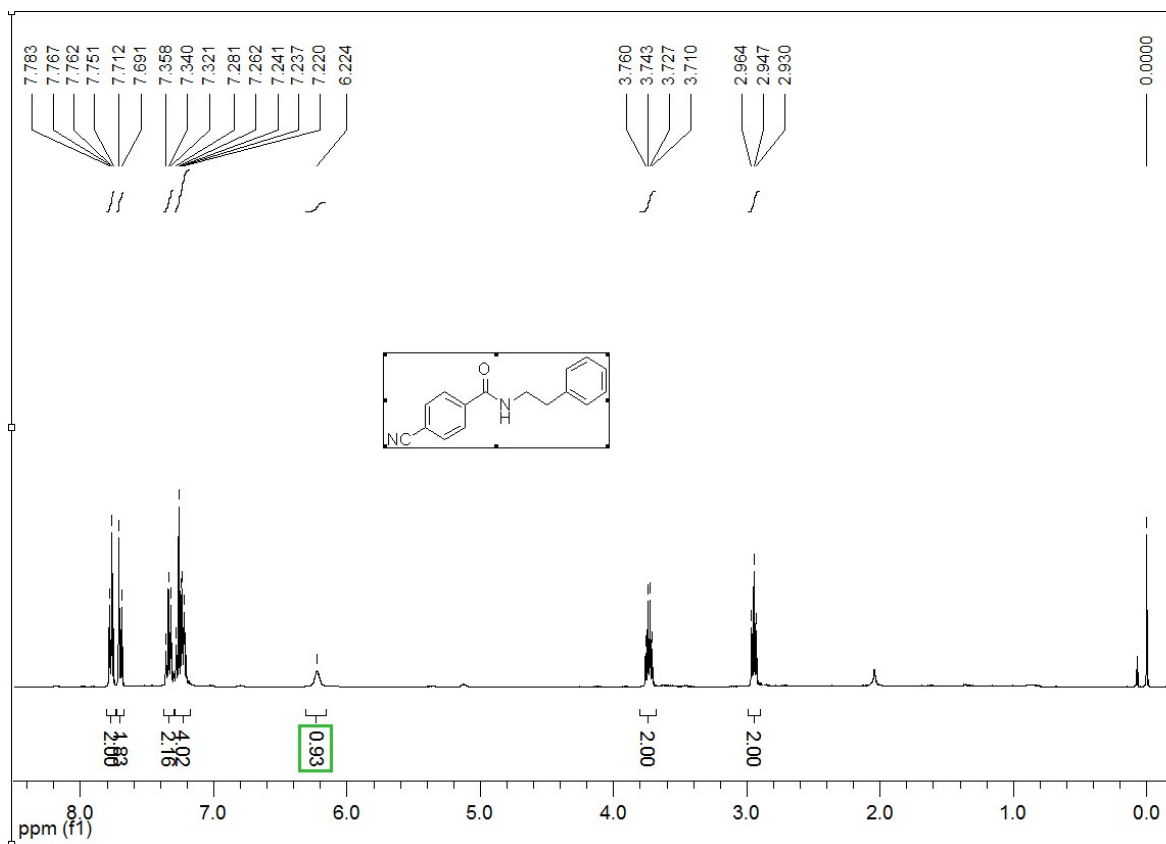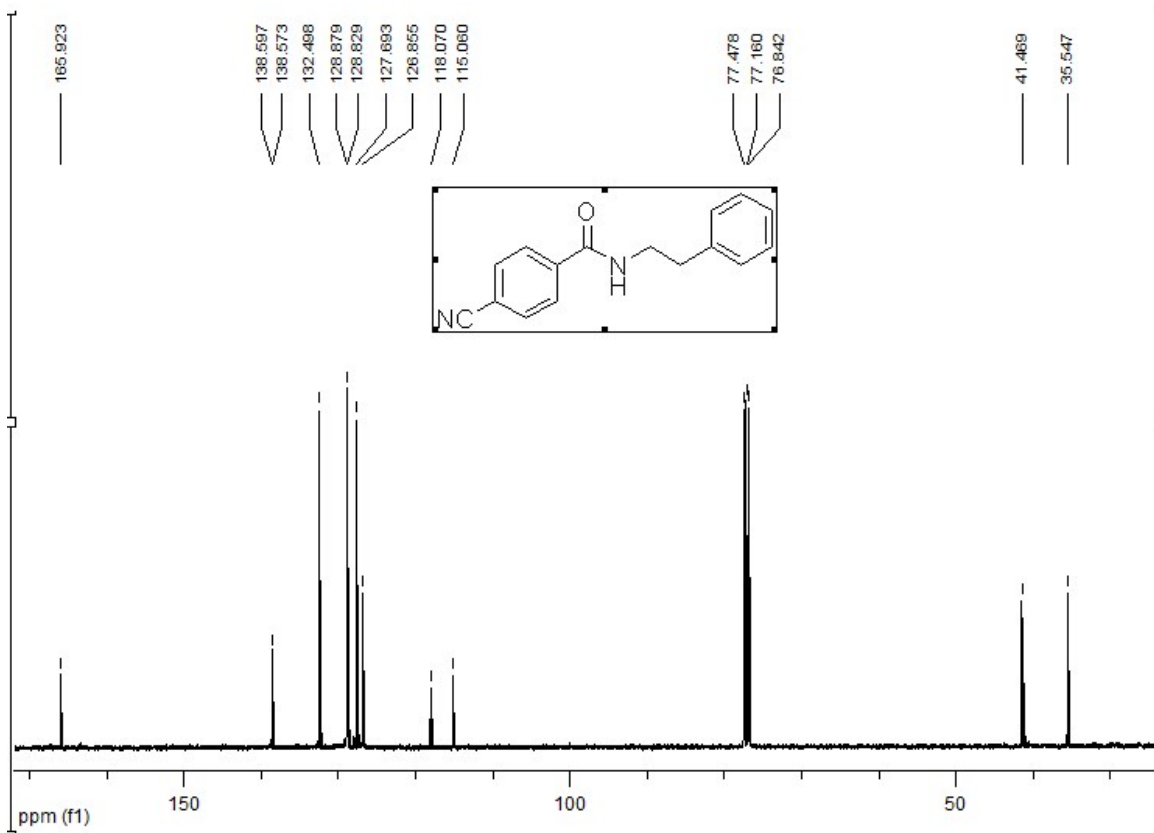

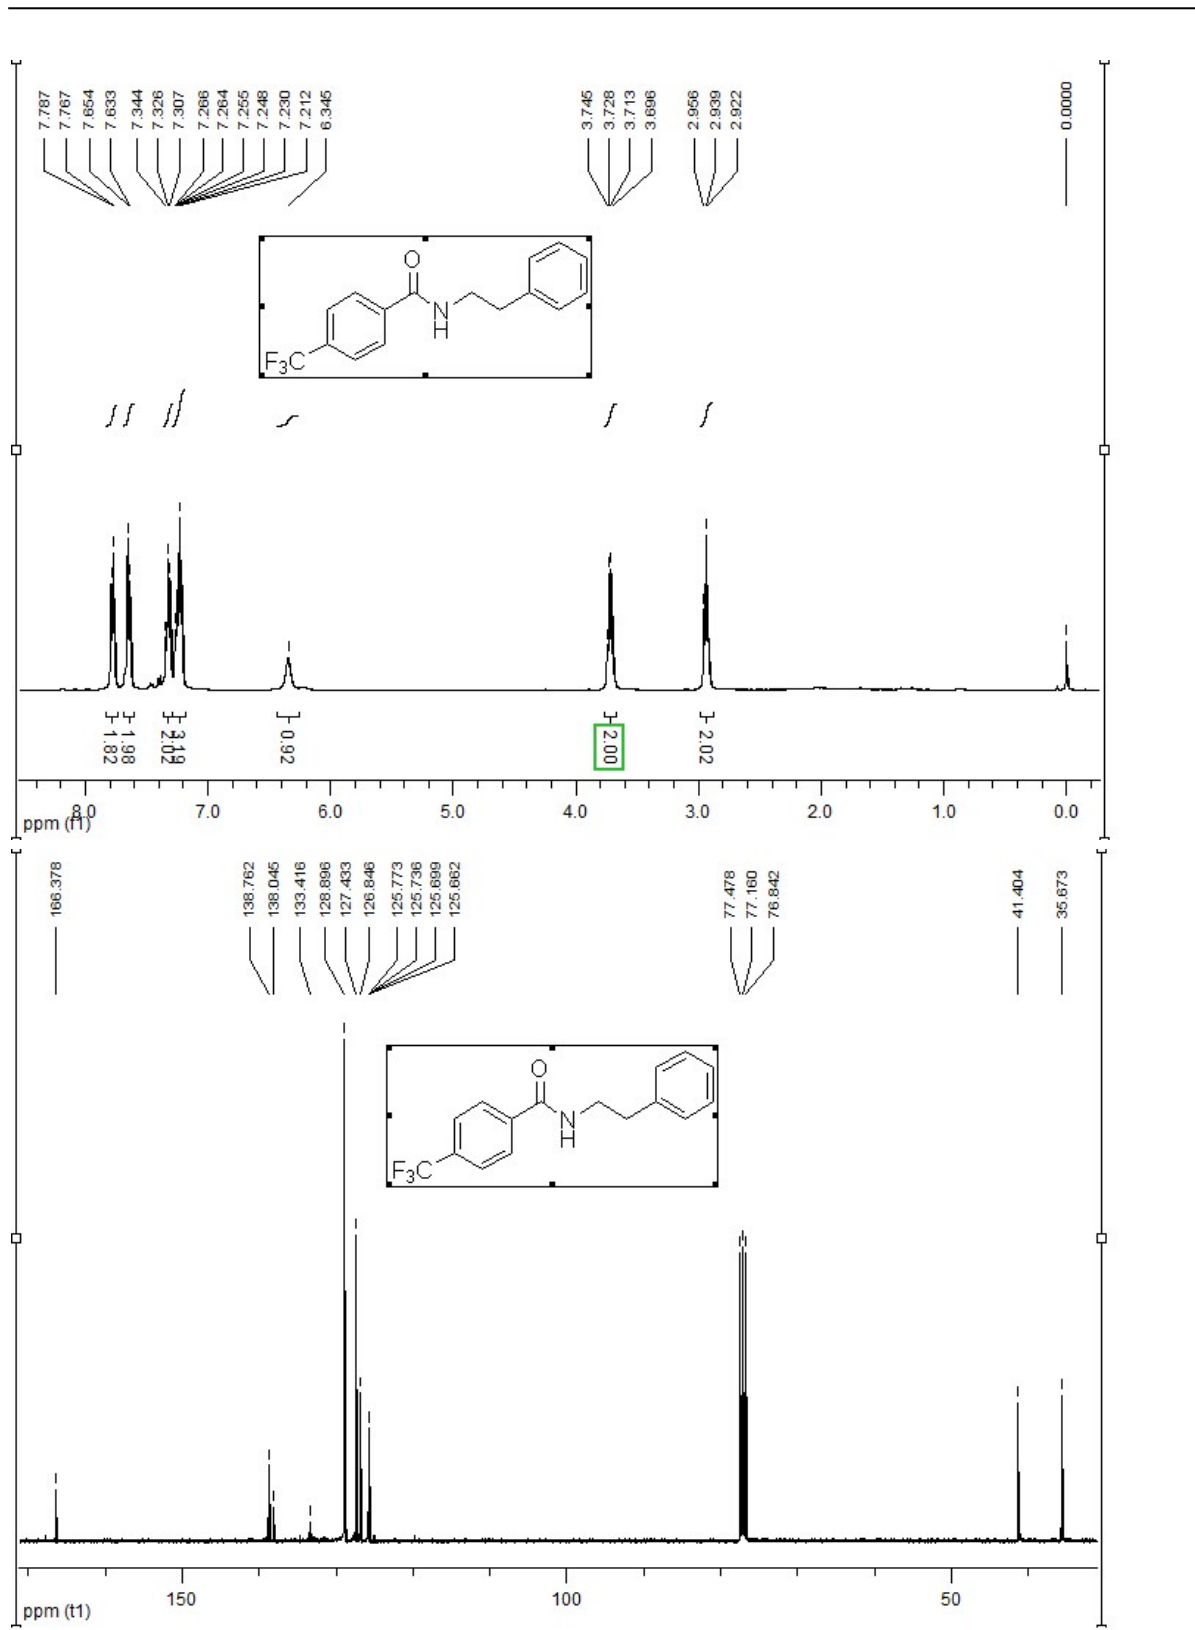

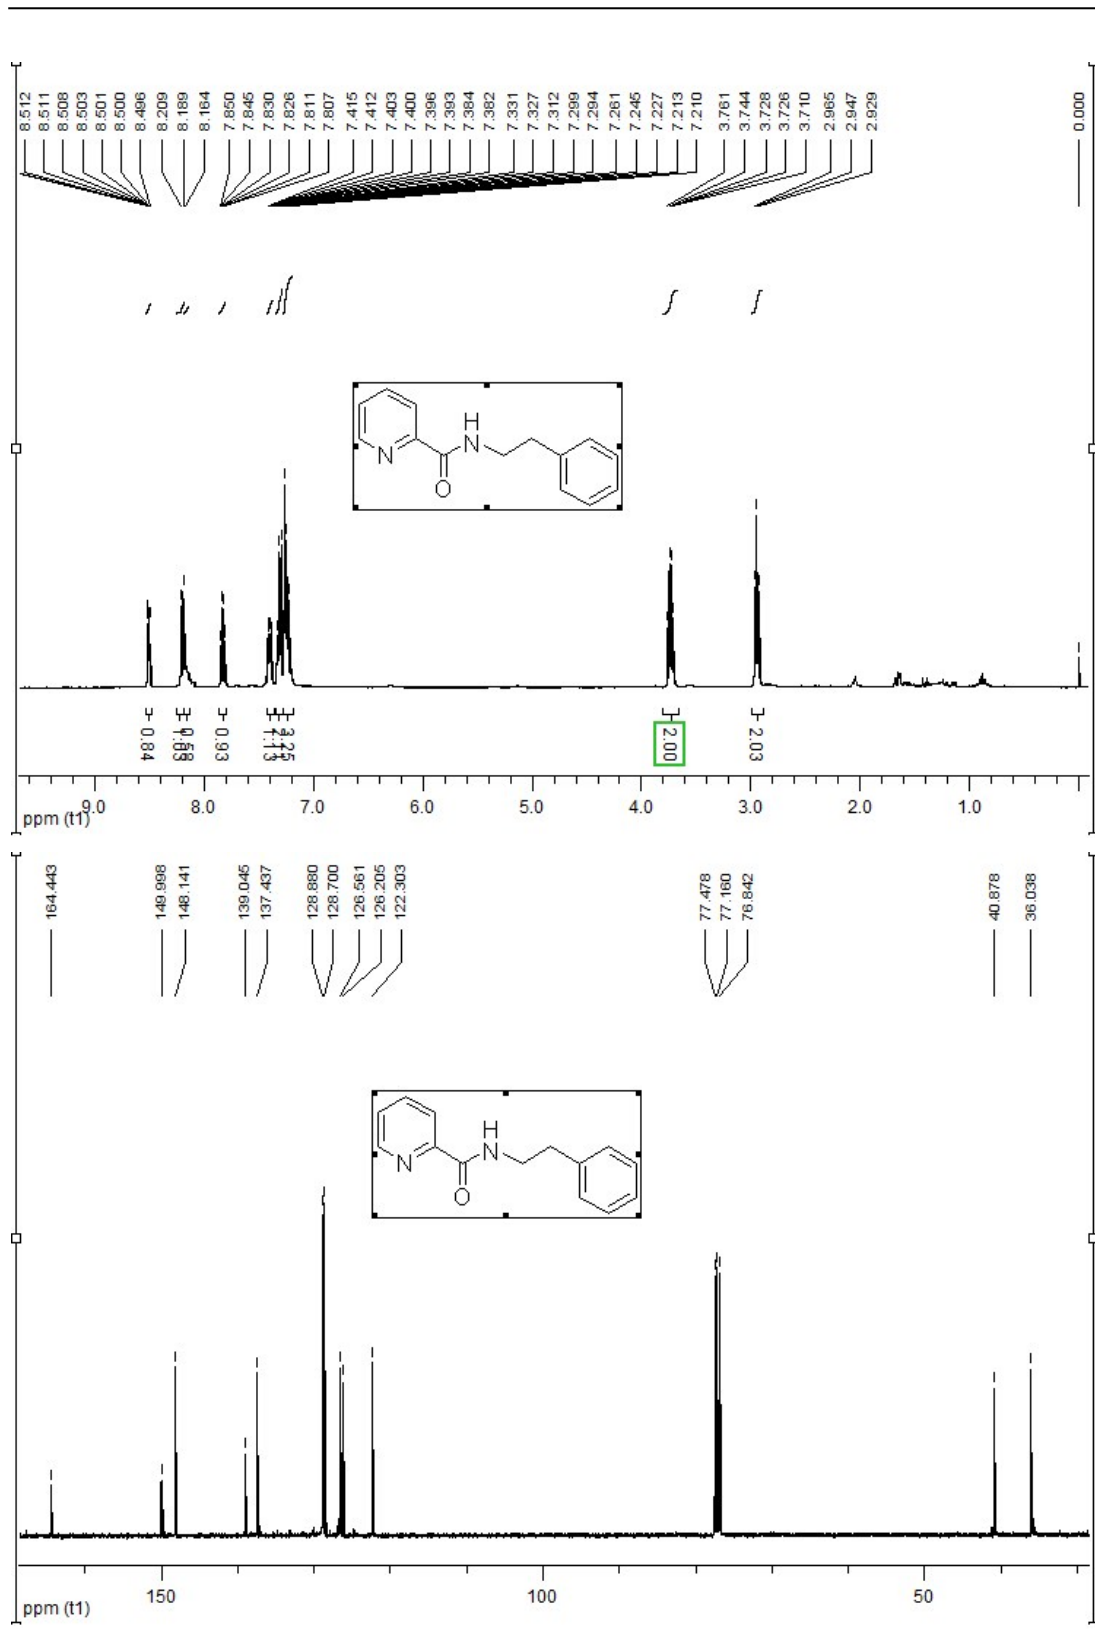

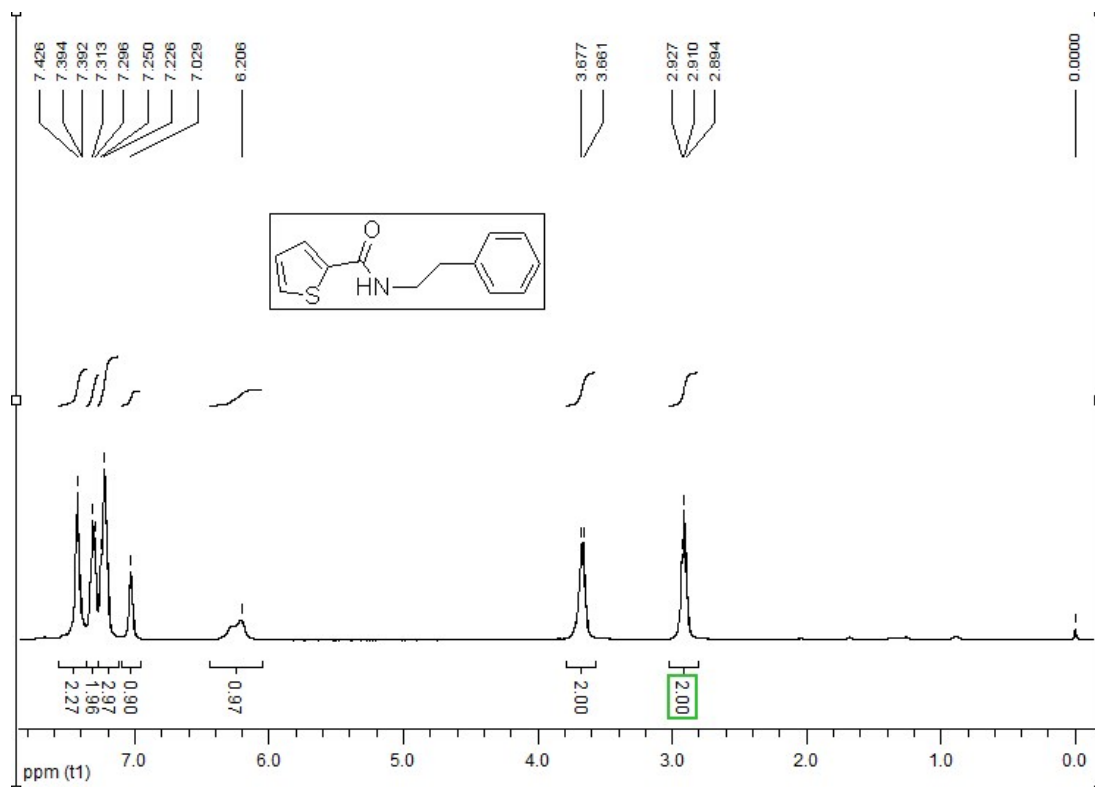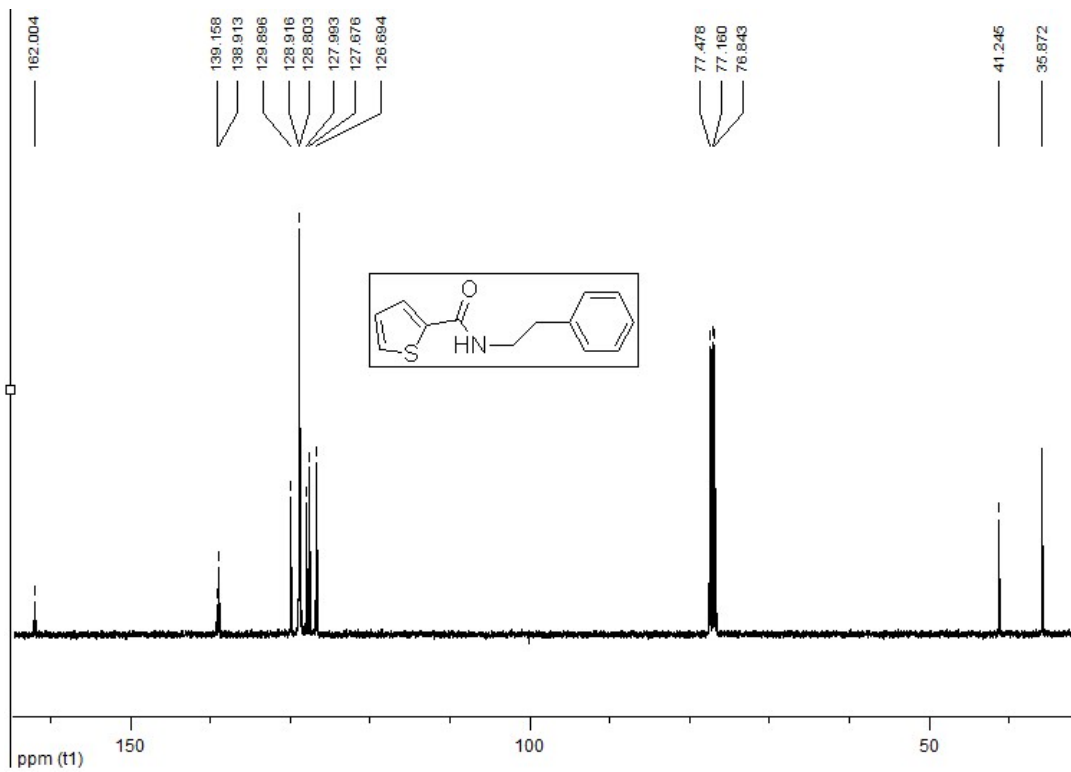

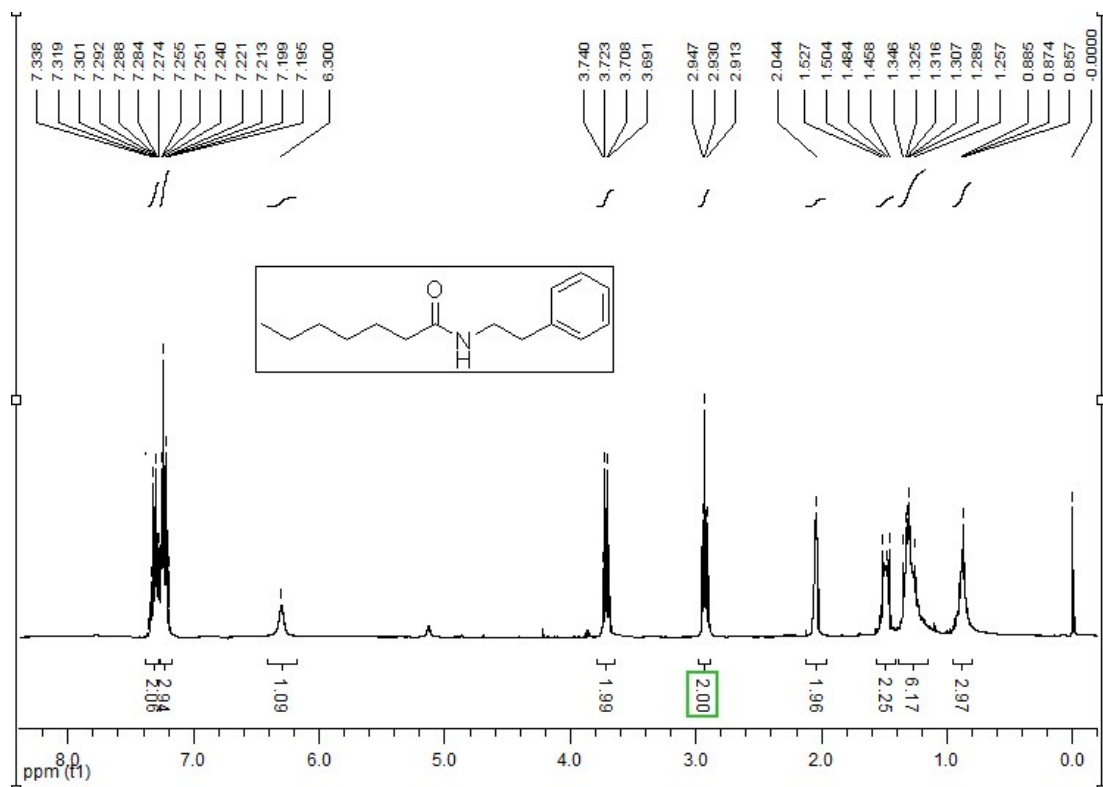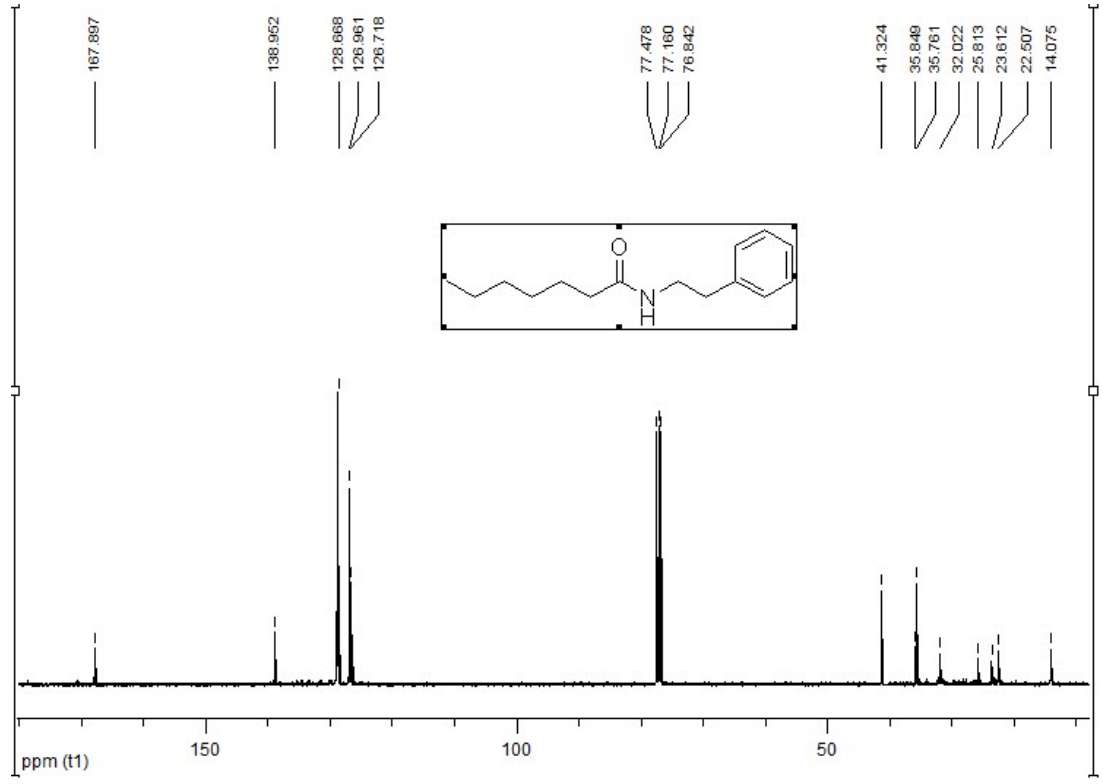

Supplement: c5ob02376a1.pdf [file c5ob02376a1.pdf]
